# Supplementary material for: Palladium-catalyzed asymmetric synthesis of 2-pyrrolidinones with a quaternary carbon stereocenter
Source: Royal Society of Chemistry journal article supplement (doi:10.1039/c2cc35259a), 2012-01-01

## Palladium-Catalyzed Asymmetric Synthesis of 2-Pyrrolidinones with Quaternary Carbon Stereocenters

Ryo Shintani,\* Tomoaki Ito, Midori Nagamoto, Haruka Otomo, and Tamio Hayashi\*

Department of Chemistry, Graduate School of Science, Kyoto University,  
Sakyo, Kyoto 606-8502, Japan, and Institute of Materials Research and Engineering,  
A\*STAR, 3 Research Link, Singapore 117602

### Supplementary Information

#### I. General

All air- and moisture-sensitive manipulations were carried out with standard Schlenk techniques under nitrogen or in a glove box under argon.

THF, Et<sub>2</sub>O, toluene, and CH<sub>2</sub>Cl<sub>2</sub> were purified by passing through neutral alumina columns under nitrogen. MeOH was distilled over Mg turnings under nitrogen. DMF was distilled over CaH<sub>2</sub> under vacuum. Et<sub>3</sub>N was distilled over KOH under nitrogen.

Benzyl isocyanate (Wako Chemicals), 4-methoxybenzyl isocyanate (Aldrich), 4-methylbenzyl isocyanate (Aldrich), 4-bromobenzyl isocyanate (Aldrich), 2-furylmethyl isocyanate (Aldrich), 2-chloroethyl isocyanate (Aldrich), ethyl 3-isocyanatopropionate (Aldrich), 4-methoxyphenyl isocyanate (TCI), phenyl isocyanate (TCI), 4-chlorophenyl isocyanate (Aldrich), 4-biphenylacetic acid (Wako Chemicals), 4-(dimethylamino)pyridine (Wako Chemicals), 1-bromo-3,5-dimethylbenzene (TCI), (*S*)-1,1'-binaphthyl-2,2'-diol (Kankyo Kagaku Center), *N,N'*-dicyclohexylcarbodiimide (Wako Chemicals), dimethyl carbonate (Aldrich), *tert*-butyl alcohol (Wako Chemicals), thionyl chloride (Wako Chemicals), PCl<sub>3</sub> (Nacalai Tesque), NaH (Kanto Chemical; 60 wt% in mineral oil), LiAlH<sub>4</sub> (Wako Chemicals), KOH (Kishida Chemical), TBAF (Aldrich; 1.0 M solution in THF), and *t*-BuLi (Kanto Chemical; 1.65 M solution in pentane) were used as received.

2-(*tert*-Butyldimethylsiloxy)methyl-2-propen-1-yl methanesulfonate,<sup>1</sup> *N,N'*-dimethoxy-*N,N'*-dimethylsuccinamide,<sup>2</sup> **1a**,<sup>3</sup> **1b**,<sup>4</sup> **1c**,<sup>3</sup> **1d**,<sup>3</sup> **1h**,<sup>3</sup> (*S,S,S*)-**L1**,<sup>5</sup> (*S,S,S*)-**L2**,<sup>6</sup> (*S,S,S*)-**L3**,<sup>7</sup> and PdCp( $\eta^3$ -C<sub>3</sub>H<sub>5</sub>)<sup>8</sup> were synthesized following the literature procedures.

All other chemicals and solvents were purchased from Aldrich, Wako Chemicals, TCI, or Kanto Chemical and used as received.

<sup>1</sup> Kitamura, T.; Sato, Y.; Mori, M. *Adv. Synth. Catal.* **2002**, 344, 678.

<sup>2</sup> Harding, M.; Hodgson, R.; Nelson, A. *J. Chem. Soc., Perkin Trans. 1* **2002**, 2403.

<sup>3</sup> Shintani, R.; Park, S.; Shirozu, F.; Murakami, M.; Hayashi, T. *J. Am. Chem. Soc.* **2008**, 130, 16174.

<sup>4</sup> Shintani, R.; Murakami, M.; Hayashi, T. *J. Am. Chem. Soc.* **2007**, 129, 12356.

<sup>5</sup> Tissot-Croset, K.; Polet, D.; Alexakis, A. *Angew. Chem., Int. Ed.* **2004**, 43, 2426.

<sup>6</sup> Alexakis, A.; Gille, S.; Prian, F.; Rosset, S.; Ditrich, K. *Tetrahedron Lett.* **2004**, 45, 1449.

<sup>7</sup> Choi, Y. H.; Choi, J. Y.; Yang, H. Y.; Kim, Y. H. *Tetrahedron: Asymmetry* **2002**, 13, 801.

<sup>8</sup> (a) Shaw, B. L. *Proc. Chem. Soc.* **1960**, 247. (b) McClellan, W. R.; Hoehn, H. H.; Cripps, H. N.; Muettterties, E. L.; Howk, B. W. *J. Am. Chem. Soc.* **1961**, 83, 1601.

## II. Synthesis of Substrates and Ligand

### Representative Procedure for Substrates 1:

#### $\alpha$ -*tert*-Butoxycarbonyl- $\alpha$ -(4-biphenyl)- $\gamma$ -methylidene- $\delta$ -valerolactone (1e)

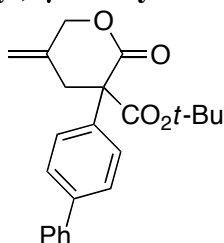

Thionyl chloride (5.50 mL, 75.4 mmol) was added to a suspension of 4-biphenylacetic acid (10.6 g, 49.9 mmol) in MeOH (170 mL) at 0 °C, and the mixture was stirred for 6 h at room temperature. After removal of the volatiles under vacuum, the residue was dissolved in dimethyl carbonate (45 mL). This solution was then added to a suspension of NaH (4.00 g, 100 mmol; 60 wt% in mineral oil) in dimethyl carbonate (15 mL) at 0 °C. The resulting mixture was stirred for 12 h while gradually raising the temperature to room temperature. The reaction was quenched with water and this was extracted with Et<sub>2</sub>O. The organic layer was washed with saturated NaCl<sub>aq</sub>, dried over MgSO<sub>4</sub>, filtered, and concentrated under vacuum. The solid thus obtained was washed with hexane to afford dimethyl 4-biphenylmalonate (CAS 156140-46-4) as a pale yellow solid (12.8 g, 45.0 mmol; 90% yield).

<sup>1</sup>H NMR (CDCl<sub>3</sub>):  $\delta$  7.61-7.56 (m, 4H), 7.47 (d, <sup>3</sup>*J*<sub>HH</sub> = 8.3 Hz, 2H), 7.44 (t, <sup>3</sup>*J*<sub>HH</sub> = 7.6 Hz, 2H), 7.35 (tt, <sup>3</sup>*J*<sub>HH</sub> = 7.4 Hz and <sup>4</sup>*J*<sub>HH</sub> = 1.3 Hz, 1H), 4.70 (s, 1H), 3.78 (s, 6H).

KOH (13.0 mL, 13.0 mmol; 1.0 M solution in MeOH) was added to a solution of dimethyl 4-biphenylmalonate (4.26 g, 15.0 mmol) in MeOH (15 mL) and the mixture was stirred for 1.5 h at room temperature. The solvent was removed under vacuum and the residue was dissolved in 5% NaHCO<sub>3</sub><sub>aq</sub>. This was washed with EtOAc (2 times) and the organic layer was extracted with 5% NaHCO<sub>3</sub><sub>aq</sub> (2 times). The combined aqueous layer was acidified with 1 M HCl<sub>aq</sub> and extracted with EtOAc (3 times). The organic layer was dried over MgSO<sub>4</sub>, filtered, and concentrated under vacuum to afford monomethyl 4-biphenylmalonate as a yellow solid (3.00 g, 11.1 mmol; 74% yield).

<sup>1</sup>H NMR (CDCl<sub>3</sub>):  $\delta$  7.60 (d, <sup>3</sup>*J*<sub>HH</sub> = 8.4 Hz, 2H), 7.59-7.55 (m, 2H), 7.47 (d, <sup>3</sup>*J*<sub>HH</sub> = 8.1 Hz, 2H), 7.44 (t, <sup>3</sup>*J*<sub>HH</sub> = 7.6 Hz, 2H), 7.36 (tt, <sup>3</sup>*J*<sub>HH</sub> = 7.3 Hz and <sup>4</sup>*J*<sub>HH</sub> = 1.3 Hz, 1H), 4.71 (s, 1H), 3.82 (s, 3H).

4-(Dimethylamino)pyridine (40.0 mg, 0.327 mmol), *tert*-butyl alcohol (1.20 mL, 12.8 mmol), and *N,N'*-dicyclohexylcarbodiimide (2.80 g, 13.6 mmol) were successively added to a solution of monomethyl 4-biphenylmalonate (2.70 g, 9.99 mmol) in CH<sub>2</sub>Cl<sub>2</sub> (60 mL) at 0 °C. The resulting mixture was stirred for 1 h while gradually raising the temperature to room temperature, and the precipitate that formed was filtered off through Celite with Et<sub>2</sub>O. After removing the solvent under vacuum, the residue was chromatographed on silica gel with EtOAc/hexane = 1/15→1/10 to afford *tert*-butyl methyl 4-biphenylmalonate as a yellow solid (3.04 g, 9.31 mmol; 93% yield).

<sup>1</sup>H NMR (CDCl<sub>3</sub>):  $\delta$  7.61-7.56 (m, 4H), 7.46 (d, <sup>3</sup>*J*<sub>HH</sub> = 8.4 Hz, 2H), 7.44 (t, <sup>3</sup>*J*<sub>HH</sub> = 7.8 Hz, 2H), 7.35 (tt, <sup>3</sup>*J*<sub>HH</sub> = 7.4 Hz and <sup>4</sup>*J*<sub>HH</sub> = 1.3 Hz, 1H), 4.60 (s, 1H), 3.77 (s, 3H), 1.47 (s, 9H).  
<sup>13</sup>C NMR (CDCl<sub>3</sub>):  $\delta$  169.1, 167.3, 141.2, 140.8, 132.2, 129.8, 128.9, 127.5, 127.4, 127.3, 82.7, 58.7, 52.8, 28.0.

A solution of *tert*-butyl methyl 4-biphenylmalonate (3.02 g, 9.25 mmol) in THF (16 mL) was added to a suspension of NaH (390 mg, 9.75 mmol; 60 wt% in mineral oil) in THF (5 mL) at 0 °C. The mixture was stirred for 40 min at 0 °C and a solution of 2-(*tert*-

butyldimethylsiloxy)methyl-2-propen-1-yl methanesulfonate (3.00 g, 10.7 mmol) in THF (12 mL) was added to it. DMF (2 mL) was then added to this mixture and it was stirred for 48 h at 55 °C. The reaction was quenched with water and extracted with Et<sub>2</sub>O. The organic layer was washed with saturated NaCl<sub>aq</sub>, dried over MgSO<sub>4</sub>, filtered, and concentrated under vacuum. The residue was chromatographed on silica gel with EtOAc/hexane = 1/15 to afford *tert*-butyl methyl (2-(*tert*-butyldimethylsiloxy)methyl-2-propen-1-yl)(4-biphenyl)malonate as a yellow oil (4.52 g, 8.85 mmol; 96% yield).

<sup>1</sup>H NMR (CDCl<sub>3</sub>): δ 7.61-7.57 (m, 4H), 7.54 (d, <sup>3</sup>J<sub>HH</sub> = 8.6 Hz, 2H), 7.43 (t, <sup>3</sup>J<sub>HH</sub> = 7.7 Hz, 2H), 7.34 (tt, <sup>3</sup>J<sub>HH</sub> = 7.4 Hz and <sup>4</sup>J<sub>HH</sub> = 1.2 Hz, 1H), 5.17-5.15 (m, 1H), 4.78-4.76 (m, 1H), 3.82 (bs, 2H), 3.76 (s, 3H), 3.12 (d, <sup>2</sup>J<sub>HH</sub> = 15.5 Hz, 1H), 3.07 (d, <sup>2</sup>J<sub>HH</sub> = 15.5 Hz, 1H), 1.44 (s, 9H), 0.88 (s, 9H), 0.01 (s, 6H). <sup>13</sup>C NMR (CDCl<sub>3</sub>): δ 171.3, 169.2, 143.7, 140.8, 140.3, 135.9, 128.89, 128.88, 127.5, 127.2, 126.7, 113.0, 82.4, 66.5, 62.8, 52.6, 38.5, 27.9, 26.0, 18.5, -5.3.

TBAF (10.0 mL, 1.0 mmol; 1.0 M solution in THF) was added to a solution of *tert*-butyl methyl (2-(*tert*-butyldimethylsiloxy)methyl-2-propen-1-yl)(4-biphenyl)malonate (4.50 g, 8.81 mmol) in THF (28 mL) at -65 °C. The mixture was stirred for 11 h while gradually raising the temperature to -5 °C and the reaction was quenched with water. After extraction with Et<sub>2</sub>O, the organic layer was washed with saturated NaCl<sub>aq</sub>, dried over MgSO<sub>4</sub>, filtered, and concentrated under vacuum. The residue was chromatographed on silica gel with EtOAc/hexane = 1/7→1/4 and the solid thus obtained was washed with hexane to afford compound **1e** as a white solid (2.25 g, 6.17 mmol; 70% yield).

<sup>1</sup>H NMR (CDCl<sub>3</sub>): δ 7.63-7.57 (m, 4H), 7.46-7.40 (m, 4H), 7.35 (tt, <sup>3</sup>J<sub>HH</sub> = 7.4 Hz and <sup>4</sup>J<sub>HH</sub> = 1.2 Hz, 1H), 5.15-5.11 (m, 1H), 5.08-5.03 (m, 1H), 4.81 (d, <sup>2</sup>J<sub>HH</sub> = 14.6 Hz, 1H), 4.68 (d, <sup>2</sup>J<sub>HH</sub> = 14.6 Hz, 1H), 3.49 (d, <sup>2</sup>J<sub>HH</sub> = 16.1 Hz, 1H), 3.25 (d, <sup>2</sup>J<sub>HH</sub> = 16.2 Hz, 1H), 1.48 (s, 9H). <sup>13</sup>C NMR (CDCl<sub>3</sub>): δ 169.5, 168.3, 141.1, 140.5, 136.6, 134.6, 128.9, 127.9, 127.7, 127.4, 127.2, 112.2, 83.7, 71.3, 59.8, 36.1, 27.9. HRMS (ESI-TOF) calcd for C<sub>23</sub>H<sub>24</sub>O<sub>4</sub>Na (M+Na<sup>+</sup>) 387.1567, found 387.1559.

#### Analytical Data for Other New Substrates:

##### α-*tert*-Butoxycarbonyl-α-(4-fluorophenyl)-γ-methylidene-δ-valerolactone (**1f**)

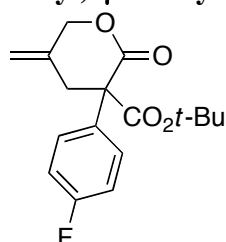

<sup>1</sup>H NMR (CDCl<sub>3</sub>): δ 7.34 (dd, <sup>3</sup>J<sub>HH</sub> = 9.0 Hz and <sup>4</sup>J<sub>HF</sub> = 5.1 Hz, 2H), 7.07 (t, <sup>3</sup>J = 8.7 Hz, 2H), 5.13-5.10 (m, 1H), 5.07-5.03 (m, 1H), 4.80 (d, <sup>2</sup>J<sub>HH</sub> = 14.6 Hz, 1H), 4.65 (d, <sup>2</sup>J<sub>HH</sub> = 14.8 Hz, 1H), 3.45 (d, <sup>2</sup>J<sub>HH</sub> = 16.0 Hz, 1H), 3.16 (d, <sup>2</sup>J<sub>HH</sub> = 16.1 Hz, 1H), 1.45 (s, 9H). <sup>13</sup>C NMR (CDCl<sub>3</sub>): δ 169.2, 168.2, 162.6 (d, <sup>1</sup>J<sub>CF</sub> = 248 Hz), 136.4, 131.4 (d, <sup>4</sup>J<sub>CF</sub> = 3.1 Hz), 129.4 (d, <sup>3</sup>J<sub>CF</sub> = 8.3 Hz), 115.6 (d, <sup>2</sup>J<sub>CF</sub> = 21.7 Hz), 112.3, 83.8, 71.3, 59.4, 36.2, 27.8. HRMS (ESI-TOF) calcd for C<sub>17</sub>H<sub>19</sub>FO<sub>4</sub>Na (M+Na<sup>+</sup>) 329.1160, found 329.1157.

##### α-*tert*-Butoxycarbonyl-α-(3,4-methylenedioxyphenyl)-γ-methylidene-δ-valerolactone (**1g**)

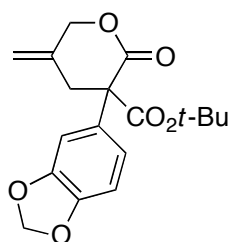

$^1\text{H}$  NMR ( $\text{CDCl}_3$ ):  $\delta$  6.85 (dd,  $^4J_{\text{HH}} = 1.3$  Hz and  $^5J_{\text{HH}} = 0.9$  Hz, 1H), 6.82-6.78 (m, 2H), 5.98-5.96 (m, 2H), 5.12-5.09 (m, 1H), 5.05-5.01 (m, 1H), 4.77 (d,  $^2J_{\text{HH}} = 14.7$  Hz, 1H), 4.65 (d,  $^2J_{\text{HH}} = 14.6$  Hz, 1H), 3.42 (d,  $^2J_{\text{HH}} = 16.2$  Hz, 1H), 3.14 (d,  $^2J_{\text{HH}} = 16.3$  Hz, 1H), 1.46 (s, 9H).  $^{13}\text{C}$  NMR ( $\text{CDCl}_3$ ):  $\delta$  169.5, 168.3, 148.1, 147.6, 136.6, 129.1, 120.9, 112.0, 108.4, 108.3, 101.5, 83.6, 71.2, 59.6, 36.0, 27.9. HRMS (ESI-TOF) calcd for  $\text{C}_{18}\text{H}_{20}\text{O}_6\text{Na}$  ( $\text{M}+\text{Na}^+$ ) 355.1152, found 355.1148.

**$\alpha$ -tert-Butoxycarbonyl- $\alpha$ -(2-methoxyphenyl)- $\gamma$ -methylidene- $\delta$ -valerolactone (1i)**

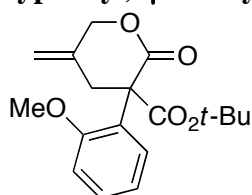

$^1\text{H}$  NMR ( $\text{CDCl}_3$ ):  $\delta$  7.32-7.27 (m, 1H), 7.11 (dd,  $^3J_{\text{HH}} = 7.9$  Hz and  $^4J_{\text{HH}} = 1.6$  Hz, 1H), 6.95-6.91 (m, 2H), 4.96-4.92 (m, 2H), 4.88-4.80 (m, 2H), 3.82 (s, 3H), 3.38 (d,  $^2J_{\text{HH}} = 15.1$  Hz, 1H), 3.21 (d,  $^2J_{\text{HH}} = 15.1$  Hz, 1H), 1.47 (s, 9H).  $^{13}\text{C}$  NMR ( $\text{CDCl}_3$ ):  $\delta$  169.1, 168.4, 157.1, 137.1, 129.4, 127.9, 126.8, 120.9, 112.2, 111.9, 83.0, 72.1, 60.2, 55.7, 36.9, 27.9. HRMS (ESI-TOF) calcd for  $\text{C}_{18}\text{H}_{22}\text{O}_5\text{Na}$  ( $\text{M}+\text{Na}^+$ ) 341.1359, found 341.1350.

**1,4-Bis(3,5-dimethylphenyl)-1,4-butanedione (CAS 860704-61-6)**

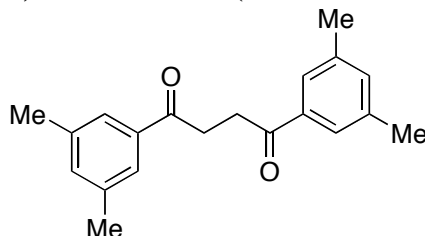

*t*-BuLi (15.0 mL, 24.8 mmol; 1.65 M solution in pentane) was added slowly over 9 min to a solution of 1-bromo-3,5-dimethylbenzene (1.65 mL, 12.0 mmol) in  $\text{Et}_2\text{O}$  (12 mL) at  $-75^\circ\text{C}$  and the mixture was stirred for 30 min at  $-75^\circ\text{C}$  and for 10 min at room temperature. This was cooled to  $0^\circ\text{C}$  and a solution of *N,N'*-dimethoxy-*N,N'*-dimethylsuccinamide (1.02 g, 4.99 mmol) in THF (10 mL) was added to it. The mixture was stirred for 1 h at  $0^\circ\text{C}$  and for 1 h at room temperature. The reaction was quenched with saturated  $\text{NH}_4\text{Cl}$  and diluted with  $\text{H}_2\text{O}$ . After extraction with  $\text{CHCl}_3$ , the organic layer was washed with saturated  $\text{NaCl}$ , dried over  $\text{MgSO}_4$ , filtered, and concentrated under vacuum. The resulting solid was washed with  $\text{Et}_2\text{O}$ /hexane to afford 1,4-bis(3,5-dimethylphenyl)-1,4-butanedione as a white solid (952 mg, 3.23 mmol; 65% yield).

$^1\text{H}$  NMR ( $\text{CDCl}_3$ ):  $\delta$  7.65 (s, 4H), 7.21 (s, 2H), 3.42 (s, 4H), 2.38 (s, 12H).  $^{13}\text{C}$  NMR ( $\text{CDCl}_3$ ):  $\delta$  199.3, 138.3, 137.1, 134.9, 126.1, 32.9, 21.4.

**(*S,S*)-2,5-Bis(3,5-dimethylphenyl)pyrrolidine (CAS 1269808-63-0)**

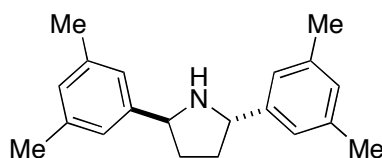

This was synthesized from 1,4-bis(3,5-dimethylphenyl)-1,4-butanedione, following the literature procedure for (*S,S*)-2,5-diphenylpyrrolidine.<sup>9</sup> 44% overall yield. Pale yellow oil.  $[\alpha]_{\text{D}}^{30} -75.4$  (*c* 0.90, CHCl<sub>3</sub>).

<sup>1</sup>H NMR (CDCl<sub>3</sub>):  $\delta$  7.03 (s, 4H), 6.89 (s, 2H), 4.51-4.34 (m, 2H), 2.41-2.32 (m, 2H), 2.33 (s, 12H), 1.95-1.83 (m, 2H), 1.83 (bs, 1H). <sup>13</sup>C NMR (CDCl<sub>3</sub>):  $\delta$  146.0, 138.1, 128.6, 124.3, 62.4, 35.7, 21.5.

### (*S,S,S*)-L4

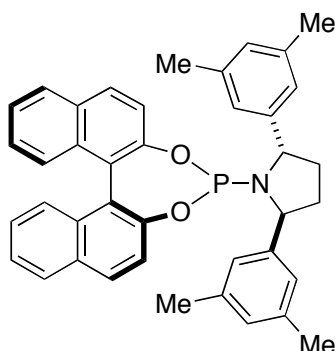

A solution of (*S,S*)-2,5-bis(3,5-dimethylphenyl)pyrrolidine (252 mg, 0.902 mmol) and Et<sub>3</sub>N (150  $\mu$ L, 1.08 mmol) in toluene (4.5 mL) was added dropwise over 50 min to a solution of PCl<sub>3</sub> (78.5  $\mu$ L, 0.900 mmol) in toluene (4.5 mL) at room temperature. The mixture was stirred for 5.5 h at 70 °C and cooled to room temperature. Et<sub>3</sub>N (414  $\mu$ L, 2.97 mmol) was added to it and the mixture was cooled to -75 °C. A solution of (*S*)-1,1'-binaphthyl-2,2'-diol (258 mg, 0.901 mmol) in toluene (3.0 mL) and THF (0.5 mL) was then added to it slowly over 5 min, and the resulting mixture was stirred for 16 h at room temperature. The precipitate was filtered off through Celite with toluene and the solvent was removed under vacuum. The residue was chromatographed on silica gel with EtOAc/hexane = 1/15 and the solid thus obtained was washed with hexane to afford compound (*S,S,S*)-L4 as a white solid (365 mg, 0.615 mmol; 68% yield).  $[\alpha]_{\text{D}}^{30} +158$  (*c* 0.41, CHCl<sub>3</sub>).

<sup>1</sup>H NMR (CDCl<sub>3</sub>):  $\delta$  7.89-7.84 (m, 2H), 7.73 (d, <sup>3</sup>*J*<sub>HH</sub> = 8.0 Hz, 1H), 7.37-7.31 (m, 2H), 7.29 (d, <sup>3</sup>*J*<sub>HH</sub> = 8.5 Hz, 1H), 7.24 (d, <sup>3</sup>*J*<sub>HH</sub> = 8.8 Hz, 1H), 7.18 (t, <sup>3</sup>*J*<sub>HH</sub> = 7.6 Hz, 1H), 7.16-7.10 (m, 3H), 6.97 (s, 2H), 6.90 (s, 4H), 6.02 (d, <sup>3</sup>*J*<sub>HH</sub> = 8.8 Hz, 1H), 5.04 (d, <sup>3</sup>*J*<sub>HH</sub> = 6.8 Hz, 2H), 2.43-2.33 (m, 2H), 2.38 (s, 12H), 1.69-1.59 (m, 2H). <sup>31</sup>P{<sup>1</sup>H} NMR (CDCl<sub>3</sub>):  $\delta$  144.6 (s). HRMS (ESI-TOF) calcd for C<sub>40</sub>H<sub>36</sub>NO<sub>2</sub>PNa (M+Na<sup>+</sup>) 616.2367, found 616.2375.

## III. Catalytic Reactions

### General Procedure for Table 1 (entries 5 and 6), Table 2, and Table 3.

Isocyanate **2** (0.200 mmol) and toluene (0.50 mL) were successively added to a solution of PdCp(η<sup>3</sup>-C<sub>3</sub>H<sub>5</sub>) (2.1 mg, 9.9  $\mu$ mol), ligand (*S,S,S*)-L4 (11.9 mg, 20.0  $\mu$ mol), and lactone **1** (0.24 mmol) in toluene (0.50 mL), and the resulting solution was stirred for 12 h at 30 °C. The reaction mixture was directly passed through a pad of silica gel with EtOAc and the

<sup>9</sup> Aldous, D. J.; Dutton, W. M.; Steel, P. G. *Tetrahedron: Asymmetry* **2000**, *11*, 2455.

solvent was removed under vacuum. The residue was purified by silica gel preparative TLC to afford compounds **3/4**.

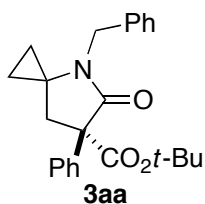

**Table 1, Entry 5.** (CAS 1086018-79-2) EtOAc/hexane = 1/3 was used for preparative TLC. Yellow oil. 89% yield (**3aa/4aa** = 90/10). The ee was determined on a Daicel Chiralpak AD-H column with hexane/2-propanol = 85/15, flow = 0.5 mL/min. Retention times: 30.1 min [major enantiomer], 32.9 min [minor enantiomer]. 92% ee.  $[\alpha]_D^{25} +14.2$  (*c* 0.88, CHCl<sub>3</sub>). The absolute configuration was assigned by analogy with Table 2, entry 5.

<sup>1</sup>H NMR (CDCl<sub>3</sub>): δ 7.59-7.55 (m, 2H), 7.37 (t, <sup>3</sup>*J*<sub>HH</sub> = 7.6 Hz, 2H), 7.34-7.21 (m, 6H), 4.48 (d, <sup>2</sup>*J*<sub>HH</sub> = 15.9 Hz, 1H), 4.15 (d, <sup>2</sup>*J*<sub>HH</sub> = 15.8 Hz, 1H), 2.88 (d, <sup>2</sup>*J*<sub>HH</sub> = 12.5 Hz, 1H), 2.64 (d, <sup>2</sup>*J*<sub>HH</sub> = 12.5 Hz, 1H), 1.47 (s, 9H), 0.89 (dt, <sup>2</sup>*J*<sub>HH</sub> = 10.8 Hz and <sup>3</sup>*J*<sub>HH</sub> = 6.4 Hz, 1H), 0.71 (dt, <sup>2</sup>*J*<sub>HH</sub> = 10.8 Hz and <sup>3</sup>*J*<sub>HH</sub> = 6.4 Hz, 1H), 0.59 (dt, <sup>2</sup>*J*<sub>HH</sub> = 10.1 Hz and <sup>3</sup>*J*<sub>HH</sub> = 6.4 Hz, 1H), 0.50 (dt, <sup>2</sup>*J*<sub>HH</sub> = 10.4 Hz and <sup>3</sup>*J*<sub>HH</sub> = 6.5 Hz, 1H). <sup>13</sup>C NMR (CDCl<sub>3</sub>): δ 171.8, 170.2, 138.0, 137.7, 128.6, 128.4, 127.52, 127.48, 127.3, 127.1, 82.4, 61.4, 42.6, 42.1, 40.7, 27.9, 7.8, 6.7.

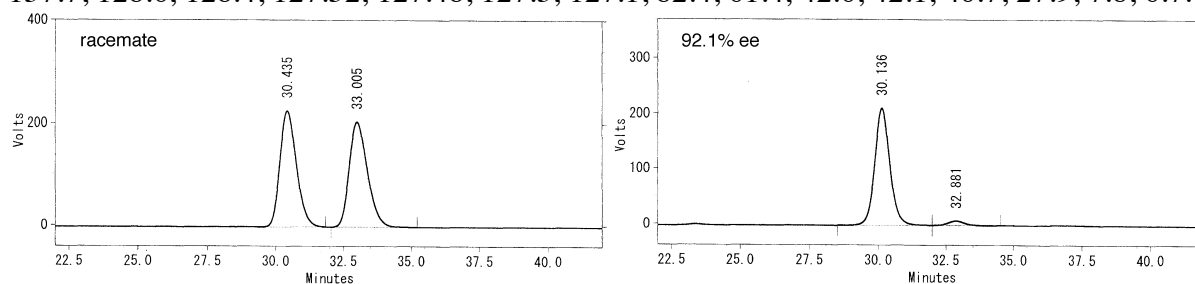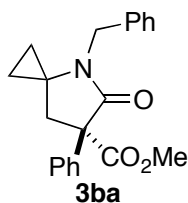

**Table 1, Entry 6.** (CAS 1225039-67-7) CH<sub>2</sub>Cl<sub>2</sub>/EtOAc/hexane = 1/2/6 was used for preparative TLC. Pale yellow oil. 89% yield (**3ba/4ba** = 92/8). The ee was determined on two Daicel Chiralcel OD-H columns with hexane/2-propanol = 95/5, flow = 0.5 mL/min. Retention times: 99.8 min [minor enantiomer], 105.9 min [major enantiomer]. 78% ee.  $[\alpha]_D^{30} +19.3$  (*c* 0.92, CHCl<sub>3</sub>). The absolute configuration was assigned by analogy with Table 2, entry 5.

<sup>1</sup>H NMR (CDCl<sub>3</sub>): δ 7.55-7.50 (m, 2H), 7.38 (t, <sup>3</sup>*J*<sub>HH</sub> = 7.5 Hz, 2H), 7.33-7.27 (m, 3H), 7.26-7.18 (m, 3H), 4.34 (d, <sup>2</sup>*J*<sub>HH</sub> = 15.9 Hz, 1H), 4.30 (d, <sup>2</sup>*J*<sub>HH</sub> = 15.9 Hz, 1H), 3.80 (s, 3H), 3.04 (d, <sup>2</sup>*J*<sub>HH</sub> = 12.7 Hz, 1H), 2.57 (d, <sup>2</sup>*J*<sub>HH</sub> = 12.7 Hz, 1H), 0.85-0.76 (m, 2H), 0.66-0.57 (m, 1H), 0.52-0.42 (m, 1H). <sup>13</sup>C NMR (CDCl<sub>3</sub>): δ 171.7, 171.3, 138.1, 137.5, 128.8, 128.7, 127.8, 127.5, 127.4, 127.1, 60.9, 53.3, 42.7, 42.4, 40.7, 7.3, 7.1.



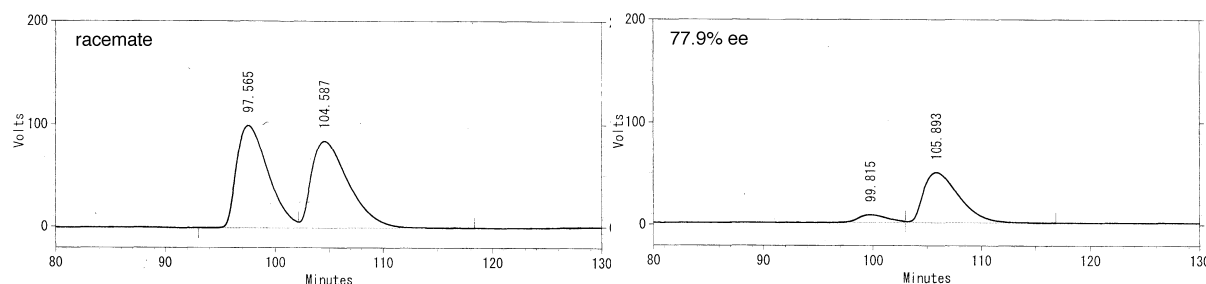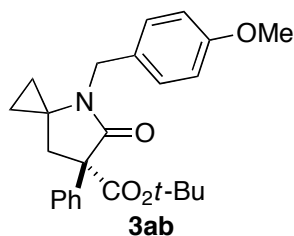

**Table 2, Entry 1.** EtOAc/hexane = 1/3 and then hexane/CH<sub>2</sub>Cl<sub>2</sub> = 1/4 were used for preparative TLC. Yellow oil. 86% yield (**3ab/4ab** = 88/12). The ee was determined on a Daicel Chiralpak AS-H column with hexane/2-propanol = 97/3, flow = 0.8 mL/min. Retention times: 24.9 min [major enantiomer], 29.8 min [minor enantiomer]. 93% ee.  $[\alpha]_D^{25} +15.9$  (*c* 0.86, CHCl<sub>3</sub>). The absolute configuration was assigned by analogy with Table 2, entry 5.

<sup>1</sup>H NMR (CDCl<sub>3</sub>): δ 7.58-7.54 (m, 2H), 7.36 (t, <sup>3</sup>J<sub>HH</sub> = 7.6 Hz, 2H), 7.29 (t, <sup>3</sup>J<sub>HH</sub> = 7.5 Hz, 1H), 7.16 (d, <sup>3</sup>J<sub>HH</sub> = 8.4 Hz, 2H), 6.82 (d, <sup>3</sup>J<sub>HH</sub> = 8.7 Hz, 2H), 4.42 (d, <sup>2</sup>J<sub>HH</sub> = 15.6 Hz, 1H), 4.10 (d, <sup>2</sup>J<sub>HH</sub> = 15.5 Hz, 1H), 3.78 (s, 3H), 2.85 (d, <sup>2</sup>J<sub>HH</sub> = 12.5 Hz, 1H), 2.61 (d, <sup>2</sup>J<sub>HH</sub> = 12.5 Hz, 1H), 1.46 (s, 9H), 0.90 (dt, <sup>2</sup>J<sub>HH</sub> = 10.7 Hz and <sup>3</sup>J<sub>HH</sub> = 6.4 Hz, 1H), 0.72 (dt, <sup>2</sup>J<sub>HH</sub> = 10.8 Hz and <sup>3</sup>J<sub>HH</sub> = 6.3 Hz, 1H), 0.58 (dt, <sup>2</sup>J<sub>HH</sub> = 10.3 Hz and <sup>3</sup>J<sub>HH</sub> = 6.3 Hz, 1H), 0.49 (dt, <sup>2</sup>J<sub>HH</sub> = 10.3 Hz and <sup>3</sup>J<sub>HH</sub> = 6.5 Hz, 1H). <sup>13</sup>C NMR (CDCl<sub>3</sub>): δ 171.7, 170.2, 158.9, 129.8, 129.7, 128.4, 128.3, 127.5, 127.4, 114.0, 82.3, 61.3, 55.3, 42.11, 42.09, 40.7, 27.9, 7.8, 6.6. HRMS (ESI-TOF) calcd for C<sub>25</sub>H<sub>29</sub>NO<sub>4</sub>Na (M+Na<sup>+</sup>) 430.1989, found 430.1988

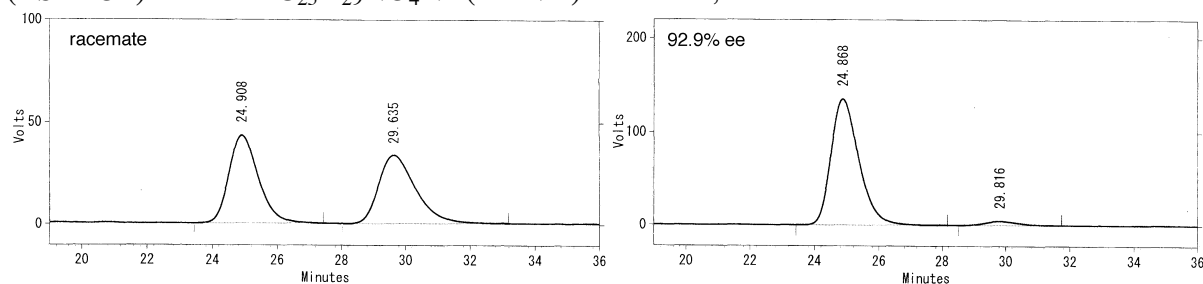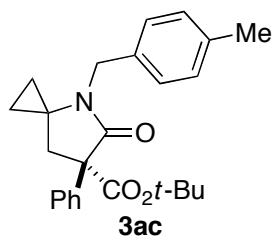

**Table 2, Entry 2.** EtOAc/hexane = 1/3 was used for preparative TLC. Pale yellow oil. 92% yield (**3ac/4ac** = 89/11). The ee was determined on two Daicel Chiralpak AS-H columns with hexane/2-propanol = 98/2, flow = 0.4 mL/min. Retention times: 63.7 min [major enantiomer], 71.0 min [minor enantiomer]. 92% ee.  $[\alpha]_D^{25} +12.2$  (*c* 0.85, CHCl<sub>3</sub>). The absolute configuration was assigned by analogy with Table 2, entry 5.

$^1\text{H}$  NMR ( $\text{CDCl}_3$ ):  $\delta$  7.59-7.54 (m, 2H), 7.36 (t,  $^3J_{\text{HH}} = 7.6$  Hz, 2H), 7.29 (tt,  $^3J_{\text{HH}} = 7.3$  Hz and  $^4J_{\text{HH}} = 1.2$  Hz, 1H), 7.12 (d,  $^3J_{\text{HH}} = 8.2$  Hz, 2H), 7.09 (d,  $^3J_{\text{HH}} = 8.0$  Hz, 2H), 4.44 (d,  $^2J_{\text{HH}} = 15.8$  Hz, 1H), 4.12 (d,  $^2J_{\text{HH}} = 15.6$  Hz, 1H), 2.87 (d,  $^2J_{\text{HH}} = 12.5$  Hz, 1H), 2.62 (d,  $^2J_{\text{HH}} = 12.5$  Hz, 1H), 2.32 (s, 3H), 1.47 (s, 9H), 0.89 (dt,  $^2J_{\text{HH}} = 10.8$  Hz and  $^3J_{\text{HH}} = 6.3$  Hz, 1H), 0.72 (dt,  $^2J_{\text{HH}} = 10.8$  Hz and  $^3J_{\text{HH}} = 6.4$  Hz, 1H), 0.58 (dt,  $^2J_{\text{HH}} = 10.2$  Hz and  $^3J_{\text{HH}} = 6.3$  Hz, 1H), 0.48 (dt,  $^2J_{\text{HH}} = 10.3$  Hz and  $^3J_{\text{HH}} = 6.5$  Hz, 1H).  $^{13}\text{C}$  NMR ( $\text{CDCl}_3$ ):  $\delta$  171.7, 170.2, 138.1, 136.9, 134.7, 129.3, 128.3, 127.5, 127.4, 127.1, 82.4, 61.4, 42.4, 42.1, 40.7, 27.9, 21.1, 7.8, 6.7. HRMS (ESI-TOF) calcd for  $\text{C}_{25}\text{H}_{29}\text{NO}_3\text{Na}$  ( $\text{M}+\text{Na}^+$ ) 414.2040, found 414.2049.

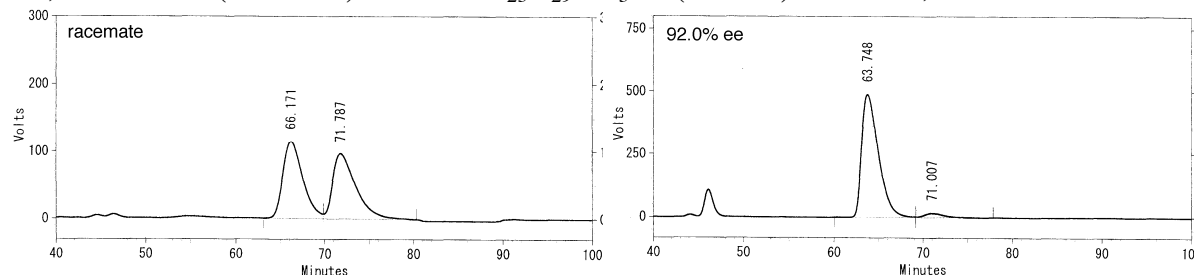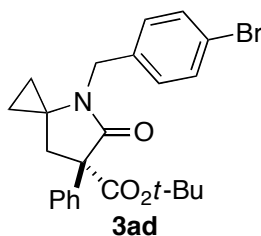

**Table 2, Entry 3.** EtOAc/hexane = 1/4 was used for preparative TLC. Yellow oil. 76% yield (**3ad**/**4ad** = 93/7). The ee was determined on two Daicel Chiralcel OD-H columns + a Daicel Chiralcel OF column with hexane/2-propanol = 85/15, flow = 0.3 mL/min. Retention times: 92.1 min [major enantiomer], 103.3 min [minor enantiomer]. 92% ee.  $[\alpha]_{\text{D}}^{30} +11.5$  ( $c$  1.17,  $\text{CHCl}_3$ ). The absolute configuration was assigned by analogy with Table 2, entry 5.

$^1\text{H}$  NMR ( $\text{CDCl}_3$ ):  $\delta$  7.58-7.53 (m, 2H), 7.41 (d,  $^3J_{\text{HH}} = 8.3$  Hz, 2H), 7.37 (t,  $^3J_{\text{HH}} = 7.6$  Hz, 2H), 7.30 (tt,  $^3J_{\text{HH}} = 7.3$  Hz and  $^4J_{\text{HH}} = 1.2$  Hz, 1H), 7.11 (d,  $^3J_{\text{HH}} = 8.4$  Hz, 2H), 4.40 (d,  $^2J_{\text{HH}} = 16.0$  Hz, 1H), 4.09 (d,  $^2J_{\text{HH}} = 16.0$  Hz, 1H), 2.88 (d,  $^2J_{\text{HH}} = 12.6$  Hz, 1H), 2.64 (d,  $^2J_{\text{HH}} = 12.5$  Hz, 1H), 1.46 (s, 9H), 0.85 (dt,  $^2J_{\text{HH}} = 10.9$  Hz and  $^3J_{\text{HH}} = 6.5$  Hz, 1H), 0.70 (dt,  $^2J_{\text{HH}} = 10.9$  Hz and  $^3J_{\text{HH}} = 6.5$  Hz, 1H), 0.61 (dt,  $^2J_{\text{HH}} = 10.3$  Hz and  $^3J_{\text{HH}} = 6.4$  Hz, 1H), 0.52 (dt,  $^2J_{\text{HH}} = 10.4$  Hz and  $^3J_{\text{HH}} = 6.5$  Hz, 1H).  $^{13}\text{C}$  NMR ( $\text{CDCl}_3$ ):  $\delta$  171.9, 170.1, 137.8, 136.8, 131.8, 128.9, 128.4, 127.6, 127.5, 121.3, 82.5, 61.3, 42.03, 41.97, 40.7, 28.0, 7.8, 6.7. HRMS (ESI-TOF) calcd for  $\text{C}_{24}\text{H}_{26}\text{BrNO}_3\text{Na}$  ( $\text{M}+\text{Na}^+$ ) 478.0988, found 478.0987.

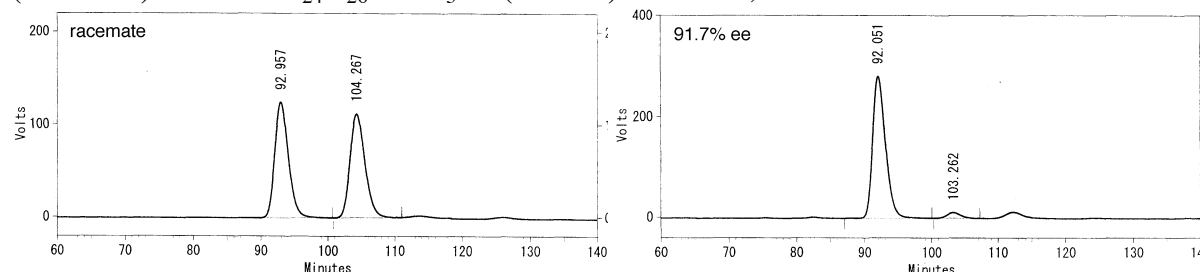



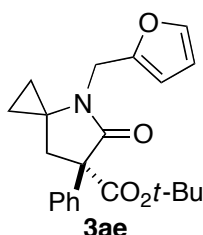

**Table 2, Entry 4.** The reaction was conducted with 1.6 equiv of **1a**. MeOH/EtOAc/hexane = 1/2/8 and then EtOAc/hexane/C<sub>6</sub>H<sub>6</sub> = 1/5/5 were used for preparative TLC. Yellow oil. 82% yield (**3ae/4ae** = 90/10). The ee was determined on a Daicel Chiralpak AD-H column with hexane/2-propanol = 95/5, flow = 0.8 mL/min. Retention times: 21.7 min [minor enantiomer], 27.7 min [major enantiomer]. 93% ee.  $[\alpha]_D^{25} +2.1$  (*c* 0.71, CHCl<sub>3</sub>). The absolute configuration was assigned by analogy with Table 2, entry 5.

<sup>1</sup>H NMR (CDCl<sub>3</sub>): δ 7.53-7.48 (m, 2H), 7.34 (t, <sup>3</sup>*J*<sub>HH</sub> = 7.6 Hz, 2H), 7.30 (dd, <sup>3</sup>*J*<sub>HH</sub> = 1.8 Hz and <sup>4</sup>*J*<sub>HH</sub> = 0.7 Hz, 1H), 7.27 (tt, <sup>3</sup>*J*<sub>HH</sub> = 7.3 Hz and <sup>4</sup>*J*<sub>HH</sub> = 1.3 Hz, 1H), 6.30 (dd, <sup>3</sup>*J*<sub>HH</sub> = 3.2 and 1.9 Hz, 1H), 6.25 (d, <sup>3</sup>*J*<sub>HH</sub> = 3.2 Hz, 1H), 4.32 (d, <sup>2</sup>*J*<sub>HH</sub> = 16.1 Hz, 1H), 4.23 (d, <sup>2</sup>*J*<sub>HH</sub> = 15.9 Hz, 1H), 2.84 (d, <sup>2</sup>*J*<sub>HH</sub> = 12.4 Hz, 1H), 2.58 (d, <sup>2</sup>*J*<sub>HH</sub> = 12.3 Hz, 1H), 1.42 (s, 9H), 1.01 (dt, <sup>2</sup>*J*<sub>HH</sub> = 10.9 Hz and <sup>3</sup>*J*<sub>HH</sub> = 6.5 Hz, 1H), 0.87 (dt, <sup>2</sup>*J*<sub>HH</sub> = 10.8 Hz and <sup>3</sup>*J*<sub>HH</sub> = 6.5 Hz, 1H), 0.66 (dt, <sup>2</sup>*J*<sub>HH</sub> = 10.3 Hz and <sup>3</sup>*J*<sub>HH</sub> = 6.3 Hz, 1H), 0.53 (dt, <sup>2</sup>*J*<sub>HH</sub> = 10.4 Hz and <sup>3</sup>*J*<sub>HH</sub> = 6.6 Hz, 1H). <sup>13</sup>C NMR (CDCl<sub>3</sub>): δ 171.4, 170.0, 150.5, 141.8, 138.2, 128.4, 127.47, 127.45, 110.8, 108.2, 82.4, 61.3, 42.2, 40.6, 35.9, 27.9, 7.8, 6.7. HRMS (ESI-TOF) calcd for C<sub>22</sub>H<sub>25</sub>NO<sub>4</sub>Na (M+Na<sup>+</sup>) 390.1676, found 390.1665.

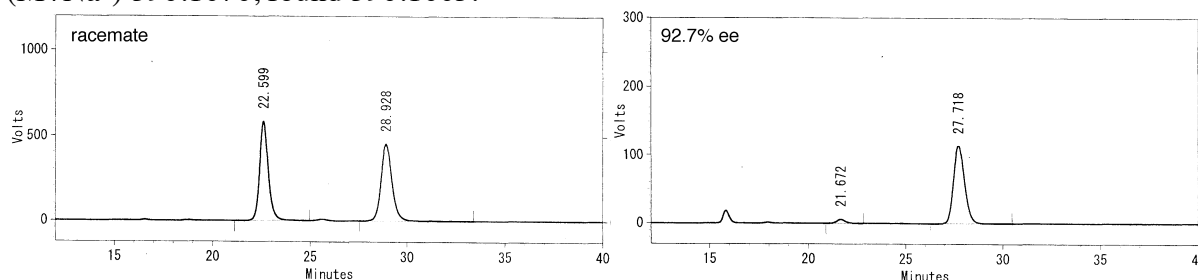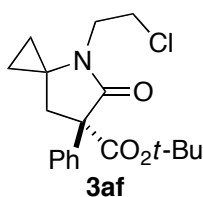

**Table 2, Entry 5.** The reaction was conducted for 45 h. EtOAc/hexane = 1/3, EtOAc/CH<sub>2</sub>Cl<sub>2</sub>/hexane = 1/4/12, and then EtOAc/hexane/toluene = 2/5/5 were used for preparative TLC. White solid. 77% yield (**3af/4af** = 91/9). The ee was determined on a Daicel Chiralpak AD-H column with hexane/2-propanol = 95/5, flow = 0.8 mL/min. Retention times: 14.0 min [minor enantiomer], 19.0 min [major enantiomer]. 90% ee.  $[\alpha]_D^{25} -2.1$  (*c* 0.76, CHCl<sub>3</sub>). The absolute configuration was determined by X-ray crystallographic analysis after recrystallization from Et<sub>2</sub>O.

<sup>1</sup>H NMR (CDCl<sub>3</sub>): δ 7.53-7.49 (m, 2H), 7.35 (t, <sup>3</sup>*J*<sub>HH</sub> = 7.5 Hz, 2H), 7.29 (tt, <sup>3</sup>*J*<sub>HH</sub> = 7.3 Hz and <sup>4</sup>*J*<sub>HH</sub> = 1.3 Hz, 1H), 3.62 (t, <sup>3</sup>*J*<sub>HH</sub> = 6.9 Hz, 2H), 3.30 (dt, <sup>2</sup>*J*<sub>HH</sub> = 14.5 Hz and <sup>3</sup>*J*<sub>HH</sub> = 6.8 Hz, 1H), 3.18 (dt, <sup>2</sup>*J*<sub>HH</sub> = 14.3 Hz and <sup>3</sup>*J*<sub>HH</sub> = 6.9 Hz, 1H), 2.85 (d, <sup>2</sup>*J*<sub>HH</sub> = 12.6 Hz, 1H), 2.64 (d, <sup>2</sup>*J*<sub>HH</sub> = 12.6 Hz, 1H), 1.44 (s, 9H), 0.99-0.90 (m, 2H), 0.83-0.75 (m, 1H), 0.68-0.61 (m, 1H). <sup>13</sup>C NMR (CDCl<sub>3</sub>): δ 171.9, 169.9, 137.9, 128.4, 127.6, 127.4, 82.5, 61.0, 41.9, 41.2, 40.4, 40.2, 27.9, 8.5, 7.4. HRMS (ESI-TOF) calcd for C<sub>19</sub>H<sub>24</sub>ClNO<sub>3</sub>Na (M+Na<sup>+</sup>) 372.1337,

found 372.1334.

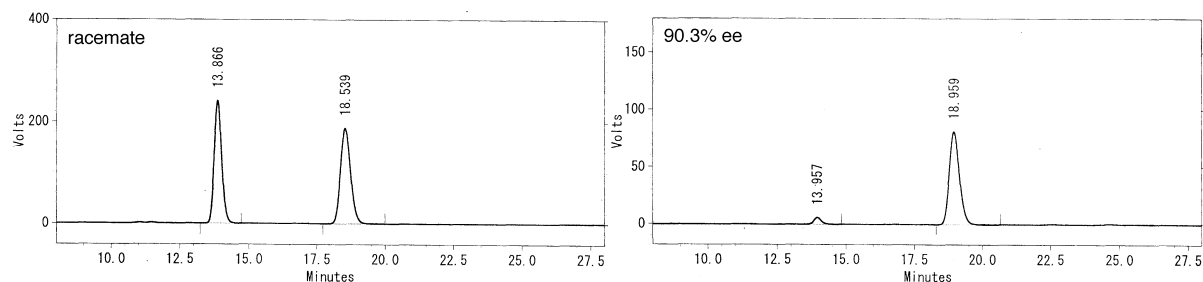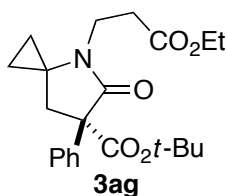

**Table 2, Entry 6.** The reaction was conducted with 1.6 equiv of **1a**. EtOAc/hexane = 1/3 and then Et<sub>2</sub>O/hexane = 1/3 were used for preparative TLC. Pale yellow oil. 72% yield (**3ag/4ag** > 99/1). The ee was determined on a Daicel Chiralpak AD-H column with hexane/2-propanol = 95/5, flow = 0.8 mL/min. Retention times: 19.7 min [minor enantiomer], 21.4 min [major enantiomer]. 92% ee. [ $\alpha$ ]<sub>D</sub><sup>25</sup> -2.2 (c 0.86, CHCl<sub>3</sub>). The absolute configuration was assigned by analogy with Table 2, entry 5.

<sup>1</sup>H NMR (CDCl<sub>3</sub>):  $\delta$  7.52-7.46 (m, 2H), 7.33 (t, <sup>3</sup>J<sub>HH</sub> = 7.5 Hz, 2H), 7.27 (tt, <sup>3</sup>J<sub>HH</sub> = 7.3 Hz and <sup>4</sup>J<sub>HH</sub> = 1.3 Hz, 1H), 4.11 (q, <sup>3</sup>J<sub>HH</sub> = 7.1 Hz, 2H), 3.28 (ddd, <sup>2</sup>J<sub>HH</sub> = 14.3 Hz and <sup>3</sup>J<sub>HH</sub> = 8.7 and 6.1 Hz, 1H), 3.15 (ddd, <sup>2</sup>J<sub>HH</sub> = 14.1 Hz and <sup>3</sup>J<sub>HH</sub> = 8.8 and 6.3 Hz, 1H), 2.82 (d, <sup>2</sup>J<sub>HH</sub> = 12.5 Hz, 1H), 2.62 (ddd, <sup>2</sup>J<sub>HH</sub> = 16.0 Hz and <sup>3</sup>J<sub>HH</sub> = 8.8 and 6.3 Hz, 1H), 2.58 (d, <sup>2</sup>J<sub>HH</sub> = 12.3 Hz, 1H), 2.56 (ddd, <sup>2</sup>J<sub>HH</sub> = 16.1 Hz and <sup>3</sup>J<sub>HH</sub> = 8.7 and 6.1 Hz, 1H), 1.43 (s, 9H), 1.23 (t, <sup>3</sup>J<sub>HH</sub> = 7.1 Hz, 3H), 0.98-0.85 (m, 2H), 0.73 (dt, <sup>2</sup>J<sub>HH</sub> = 10.4 Hz and <sup>3</sup>J<sub>HH</sub> = 6.0 Hz, 1H), 0.59 (dt, <sup>2</sup>J<sub>HH</sub> = 10.4 Hz and <sup>3</sup>J<sub>HH</sub> = 6.0 Hz, 1H). <sup>13</sup>C NMR (CDCl<sub>3</sub>):  $\delta$  171.6, 171.5, 170.1, 138.2, 128.3, 127.44, 127.37, 82.3, 61.0, 60.7, 42.0, 40.0, 35.1, 33.1, 27.9, 14.3, 8.2, 7.1. HRMS (ESI-TOF) calcd for C<sub>22</sub>H<sub>29</sub>NO<sub>5</sub>Na (M+Na<sup>+</sup>) 410.1938, found 410.1941.

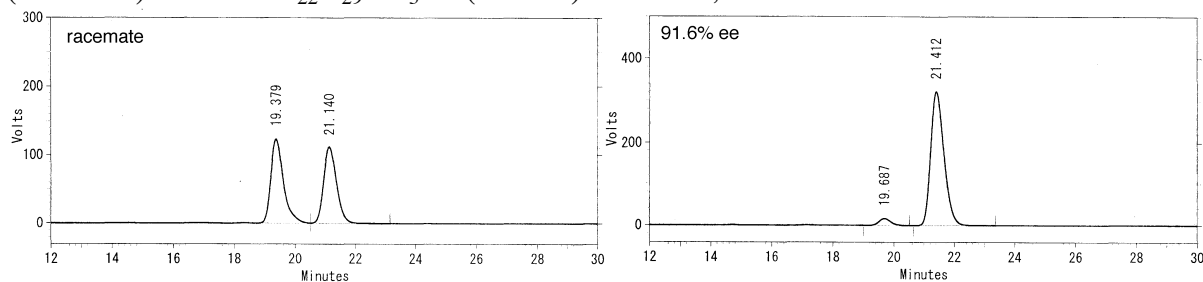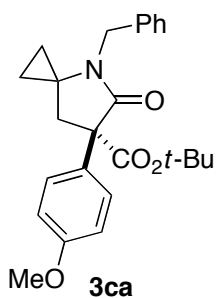

**Table 2, Entry 7.** EtOAc/hexane = 1/3 and then hexane/CH<sub>2</sub>Cl<sub>2</sub> = 1/4 were used for preparative TLC. Yellow oil. 81% yield (**3ca/4ca** = 89/11). The ee was determined on a

Daicel Chiralpak AD-H column with hexane/2-propanol = 90/10, flow = 0.8 mL/min. Retention times: 42.7 min [major enantiomer], 55.0 min [minor enantiomer]. 93% ee.  $[\alpha]_D^{25} +10.6$  ( $c$  1.03,  $\text{CHCl}_3$ ). The absolute configuration was assigned by analogy with Table 2, entry 5.

$^1\text{H}$  NMR ( $\text{CDCl}_3$ ):  $\delta$  7.52 (d,  $^3J_{\text{HH}} = 9.0$  Hz, 2H), 7.33-7.21 (m, 5H), 6.90 (d,  $^3J_{\text{HH}} = 8.9$  Hz, 2H), 4.48 (d,  $^2J_{\text{HH}} = 15.9$  Hz, 1H), 4.13 (d,  $^2J_{\text{HH}} = 15.9$  Hz, 1H), 3.81 (s, 3H), 2.85 (d,  $^2J_{\text{HH}} = 12.4$  Hz, 1H), 2.62 (d,  $^2J_{\text{HH}} = 12.5$  Hz, 1H), 1.47 (s, 9H), 0.89 (dt,  $^2J_{\text{HH}} = 10.7$  Hz and  $^3J_{\text{HH}} = 6.3$  Hz, 1H), 0.70 (dt,  $^2J_{\text{HH}} = 10.7$  Hz and  $^3J_{\text{HH}} = 6.4$  Hz, 1H), 0.58 (dt,  $^2J_{\text{HH}} = 10.2$  Hz and  $^3J_{\text{HH}} = 6.2$  Hz, 1H), 0.50 (dt,  $^2J_{\text{HH}} = 10.2$  Hz and  $^3J_{\text{HH}} = 6.4$  Hz, 1H).  $^{13}\text{C}$  NMR ( $\text{CDCl}_3$ ):  $\delta$  172.1, 170.5, 159.0, 137.8, 128.73, 128.71, 128.67, 127.4, 127.2, 113.8, 82.3, 60.6, 55.4, 42.6, 42.0, 40.7, 28.0, 7.8, 6.7. HRMS (ESI-TOF) calcd for  $\text{C}_{25}\text{H}_{29}\text{NO}_4\text{Na}$  ( $\text{M}+\text{Na}^+$ ) 430.1989, found 430.1983.

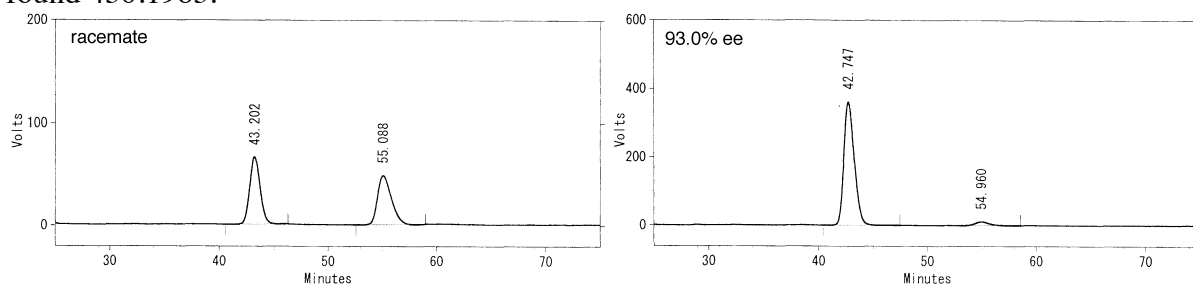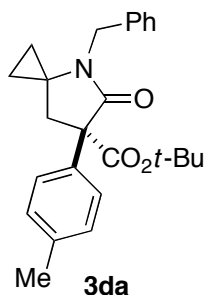

**Table 2, Entry 8.** EtOAc/hexane = 1/3 was used for preparative TLC. Yellow oil. 83% yield (**3da/4da** = 89/11). The ee was determined on two Daicel Chiralpak AS-H columns with hexane/2-propanol = 98/2, flow = 0.4 mL/min. Retention times: 65.1 min [minor enantiomer], 70.9 min [major enantiomer]. 93% ee.  $[\alpha]_D^{25} +5.7$  ( $c$  1.23,  $\text{CHCl}_3$ ). The absolute configuration was assigned by analogy with Table 2, entry 5.

$^1\text{H}$  NMR ( $\text{CDCl}_3$ ):  $\delta$  7.46 (d,  $^3J_{\text{HH}} = 8.3$  Hz, 2H), 7.32-7.20 (m, 5H), 7.18 (d,  $^3J_{\text{HH}} = 8.5$  Hz, 2H), 4.48 (d,  $^2J_{\text{HH}} = 15.9$  Hz, 1H), 4.14 (d,  $^2J_{\text{HH}} = 15.9$  Hz, 1H), 2.86 (d,  $^2J_{\text{HH}} = 12.5$  Hz, 1H), 2.63 (d,  $^2J_{\text{HH}} = 12.5$  Hz, 1H), 2.34 (s, 3H), 1.47 (s, 9H), 0.89 (dt,  $^2J_{\text{HH}} = 10.8$  Hz and  $^3J_{\text{HH}} = 6.3$  Hz, 1H), 0.70 (dt,  $^2J_{\text{HH}} = 10.9$  Hz and  $^3J_{\text{HH}} = 6.3$  Hz, 1H), 0.58 (dt,  $^2J_{\text{HH}} = 10.3$  Hz and  $^3J_{\text{HH}} = 6.2$  Hz, 1H), 0.50 (dt,  $^2J_{\text{HH}} = 10.2$  Hz and  $^3J_{\text{HH}} = 6.4$  Hz, 1H).  $^{13}\text{C}$  NMR ( $\text{CDCl}_3$ ):  $\delta$  171.9, 170.4, 137.8, 137.1, 134.9, 129.0, 128.6, 127.4, 127.3, 127.1, 82.3, 61.0, 42.5, 42.0, 40.7, 27.9, 21.1, 7.8, 6.6. HRMS (ESI-TOF) calcd for  $\text{C}_{25}\text{H}_{29}\text{NO}_3\text{Na}$  ( $\text{M}+\text{Na}^+$ ) 414.2040, found 414.2050.

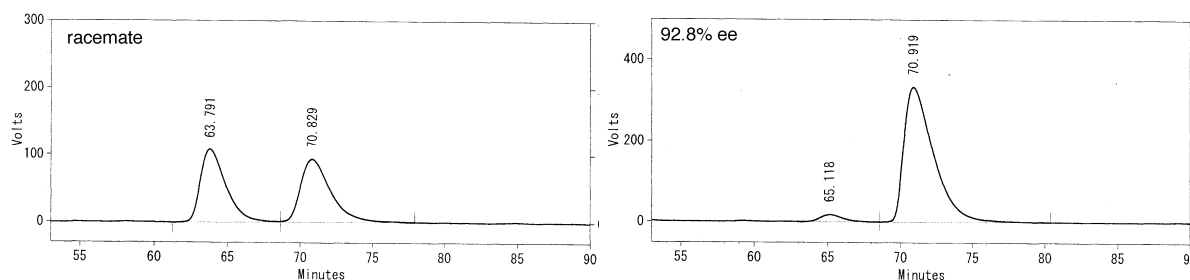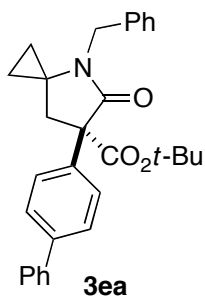

**Table 2, Entry 9.** EtOAc/hexane = 1/4 was used for preparative TLC. Brown oil. 93% yield (**3ea/4ea** = 92/8). The ee was determined on a Daicel Chiralpak AD-H column with hexane/2-propanol = 85/15, flow = 0.8 mL/min. Retention times: 33.2 min [major enantiomer], 45.8 min [minor enantiomer]. 93% ee.  $[\alpha]_D^{25} -11.3$  (*c* 0.75, CHCl<sub>3</sub>). The absolute configuration was assigned by analogy with Table 2, entry 5.

<sup>1</sup>H NMR (CDCl<sub>3</sub>): δ 7.66 (d, <sup>3</sup>*J*<sub>HH</sub> = 8.7 Hz, 2H), 7.63-7.58 (m, 4H), 7.44 (t, <sup>3</sup>*J*<sub>HH</sub> = 7.7 Hz, 2H), 7.37-7.27 (m, 3H), 7.27-7.22 (m, 3H), 4.51 (d, <sup>2</sup>*J*<sub>HH</sub> = 15.9 Hz, 1H), 4.17 (d, <sup>2</sup>*J*<sub>HH</sub> = 15.9 Hz, 1H), 2.91 (d, <sup>2</sup>*J*<sub>HH</sub> = 12.6 Hz, 1H), 2.70 (d, <sup>2</sup>*J*<sub>HH</sub> = 12.5 Hz, 1H), 1.50 (s, 9H), 0.93 (dt, <sup>2</sup>*J*<sub>HH</sub> = 10.8 Hz and <sup>3</sup>*J*<sub>HH</sub> = 6.3 Hz, 1H), 0.73 (dt, <sup>2</sup>*J*<sub>HH</sub> = 10.8 Hz and <sup>3</sup>*J*<sub>HH</sub> = 6.3 Hz, 1H), 0.61 (dt, <sup>2</sup>*J*<sub>HH</sub> = 10.4 Hz and <sup>3</sup>*J*<sub>HH</sub> = 6.2 Hz, 1H), 0.54 (dt, <sup>2</sup>*J*<sub>HH</sub> = 10.3 Hz and <sup>3</sup>*J*<sub>HH</sub> = 6.4 Hz, 1H). <sup>13</sup>C NMR (CDCl<sub>3</sub>): δ 171.8, 170.2, 140.9, 140.3, 137.7, 137.0, 128.8, 128.7, 128.0, 127.38, 127.37, 127.2, 127.14, 127.10, 82.6, 61.2, 42.7, 42.0, 40.8, 28.0, 7.9, 6.7. HRMS (ESI-TOF) calcd for C<sub>30</sub>H<sub>31</sub>NO<sub>3</sub>Na (M+Na<sup>+</sup>) 476.2196, found 476.2195.

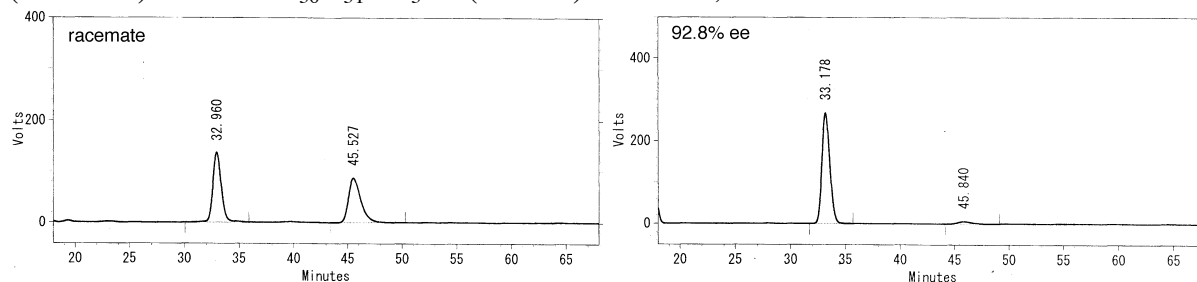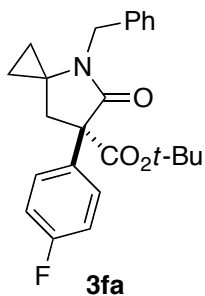

**Table 2, Entry 10.** EtOAc/hexane = 1/3 was used for preparative TLC. Yellow oil. 94% yield (**3fa/4fa** = 90/10). The ee was determined on a Daicel Chiralpak AD-H column with hexane/2-propanol = 85/15, flow = 0.8 mL/min. Retention times: 18.1 min [major

enantiomer], 25.8 min [minor enantiomer]. 93% ee.  $[\alpha]^{30}_D +10.7$  (*c* 0.75, CHCl<sub>3</sub>). The absolute configuration was assigned by analogy with Table 2, entry 5.

<sup>1</sup>H NMR (CDCl<sub>3</sub>): δ 7.58 (dd, <sup>3</sup>*J*<sub>HH</sub> = 8.6 Hz and <sup>4</sup>*J*<sub>HF</sub> = 5.2 Hz, 2H), 7.33-7.20 (m, 5H), 7.05 (t, <sup>3</sup>*J* = 8.8 Hz, 2H), 4.48 (d, <sup>2</sup>*J*<sub>HH</sub> = 15.8 Hz, 1H), 4.14 (d, <sup>2</sup>*J*<sub>HH</sub> = 15.9 Hz, 1H), 2.86 (d, <sup>2</sup>*J*<sub>HH</sub> = 12.4 Hz, 1H), 2.62 (d, <sup>2</sup>*J*<sub>HH</sub> = 12.5 Hz, 1H), 1.46 (s, 9H), 0.90 (dt, <sup>2</sup>*J*<sub>HH</sub> = 11.0 Hz and <sup>3</sup>*J*<sub>HH</sub> = 6.4 Hz, 1H), 0.71 (dt, <sup>2</sup>*J*<sub>HH</sub> = 10.9 Hz and <sup>3</sup>*J*<sub>HH</sub> = 6.4 Hz, 1H), 0.59 (dt, <sup>2</sup>*J*<sub>HH</sub> = 10.2 Hz and <sup>3</sup>*J*<sub>HH</sub> = 6.4 Hz, 1H), 0.51 (dt, <sup>2</sup>*J*<sub>HH</sub> = 10.3 Hz and <sup>3</sup>*J*<sub>HH</sub> = 6.5 Hz, 1H). <sup>13</sup>C NMR (CDCl<sub>3</sub>): δ 171.7, 170.1, 162.2 (d, <sup>1</sup>*J*<sub>CF</sub> = 246 Hz), 137.6, 133.7 (d, <sup>4</sup>*J*<sub>CF</sub> = 3.1 Hz), 129.3 (d, <sup>3</sup>*J*<sub>CF</sub> = 7.7 Hz), 128.7, 127.4, 127.1, 115.1 (d, <sup>2</sup>*J*<sub>CF</sub> = 21.2 Hz), 82.6, 60.6, 42.6, 42.0, 40.7, 27.9, 7.9, 6.6. HRMS (ESI-TOF) calcd for C<sub>24</sub>H<sub>26</sub>FNO<sub>3</sub>Na (M+Na<sup>+</sup>) 418.1789, found 418.1798.

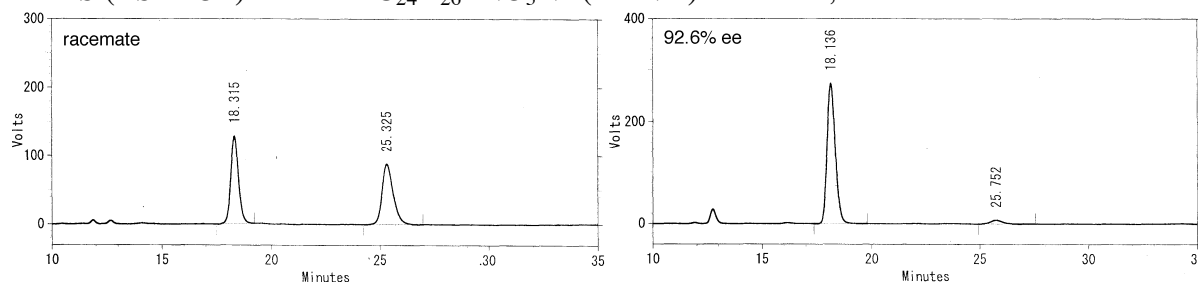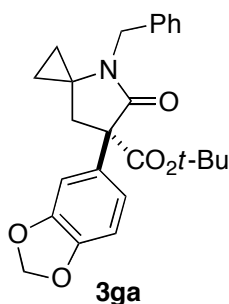

**Table 2, Entry 11.** EtOAc/hexane = 1/3 and then EtOAc/CH<sub>2</sub>Cl<sub>2</sub>/hexane = 1/2/3 were used for preparative TLC. Pale yellow oil. 85% yield (**3ga**/**4ga** = 91/9). The ee was determined on a Daicel Chiralpak AD-H column with hexane/2-propanol = 85/15, flow = 0.5 mL/min. Retention times: 43.3 min [minor enantiomer], 49.3 min [major enantiomer]. 92% ee.  $[\alpha]^{30}_D -4.3$  (*c* 0.80, CHCl<sub>3</sub>). The absolute configuration was assigned by analogy with Table 2, entry 5.

<sup>1</sup>H NMR (CDCl<sub>3</sub>): δ 7.33-7.20 (m, 5H), 7.17 (d, <sup>4</sup>*J*<sub>HH</sub> = 2.0 Hz, 1H), 7.02 (dd, <sup>3</sup>*J*<sub>HH</sub> = 8.1 Hz and <sup>4</sup>*J*<sub>HH</sub> = 1.8 Hz, 1H), 6.79 (d, <sup>3</sup>*J*<sub>HH</sub> = 8.1 Hz, 1H), 5.954 (d, <sup>2</sup>*J*<sub>HH</sub> = 1.4 Hz, 1H), 5.947 (d, <sup>2</sup>*J*<sub>HH</sub> = 1.4 Hz, 1H), 4.47 (d, <sup>2</sup>*J*<sub>HH</sub> = 15.9 Hz, 1H), 4.13 (d, <sup>2</sup>*J*<sub>HH</sub> = 15.9 Hz, 1H), 2.82 (d, <sup>2</sup>*J*<sub>HH</sub> = 12.4 Hz, 1H), 2.60 (d, <sup>2</sup>*J*<sub>HH</sub> = 12.3 Hz, 1H), 1.47 (s, 9H), 0.91 (dt, <sup>2</sup>*J*<sub>HH</sub> = 10.8 Hz and <sup>3</sup>*J*<sub>HH</sub> = 6.1 Hz, 1H), 0.69 (dt, <sup>2</sup>*J*<sub>HH</sub> = 10.8 Hz and <sup>3</sup>*J*<sub>HH</sub> = 6.4 Hz, 1H), 0.58 (dt, <sup>2</sup>*J*<sub>HH</sub> = 10.3 Hz and <sup>3</sup>*J*<sub>HH</sub> = 6.1 Hz, 1H), 0.51 (dt, <sup>2</sup>*J*<sub>HH</sub> = 10.2 Hz and <sup>3</sup>*J*<sub>HH</sub> = 6.3 Hz, 1H). <sup>13</sup>C NMR (CDCl<sub>3</sub>): δ 171.9, 170.3, 147.7, 147.1, 137.7, 131.7, 128.7, 127.4, 127.2, 120.8, 108.7, 108.1, 101.2, 82.5, 60.9, 42.7, 42.2, 40.7, 28.0, 7.9, 6.6. HRMS (ESI-TOF) calcd for C<sub>25</sub>H<sub>27</sub>NO<sub>5</sub>Na (M+Na<sup>+</sup>) 444.1781, found 444.1786.

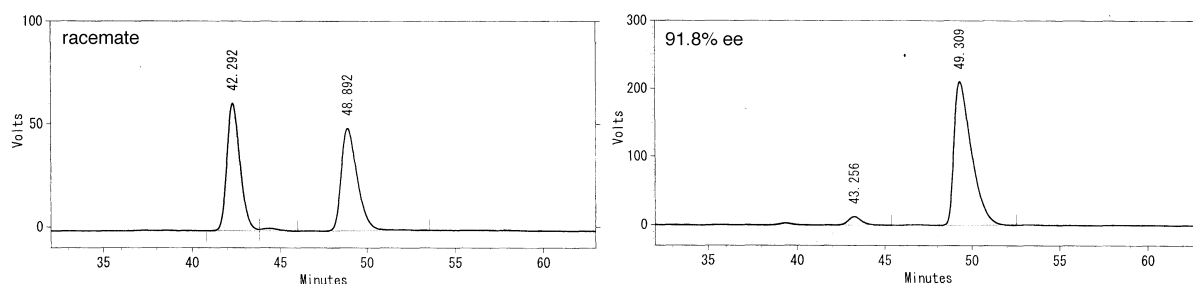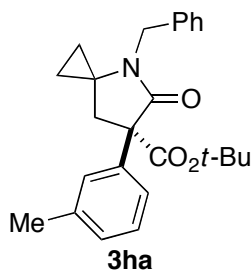

**Table 2, Entry 12.** EtOAc/hexane = 1/3 was used for preparative TLC. Yellow oil. 83% yield (**3ha**/**4ha** = 90/10). The ee was determined on a Daicel Chiralpak AD-H column with hexane/2-propanol = 95/5, flow = 0.5 mL/min. Retention times: 61.8 min [major enantiomer], 70.8 min [minor enantiomer]. 92% ee.  $[\alpha]^{25}_D +10.0$  (*c* 0.77, CHCl<sub>3</sub>). The absolute configuration was assigned by analogy with Table 2, entry 5.

<sup>1</sup>H NMR (CDCl<sub>3</sub>): δ 7.38 (s, 1H), 7.36-7.32 (m, 2H), 7.31-7.21 (m, 5H), 7.11 (d, <sup>3</sup>J<sub>HH</sub> = 7.4 Hz, 1H), 4.48 (d, <sup>2</sup>J<sub>HH</sub> = 15.9 Hz, 1H), 4.16 (d, <sup>2</sup>J<sub>HH</sub> = 15.9 Hz, 1H), 2.86 (d, <sup>2</sup>J<sub>HH</sub> = 12.4 Hz, 1H), 2.63 (d, <sup>2</sup>J<sub>HH</sub> = 12.4 Hz, 1H), 2.36 (s, 3H), 1.48 (s, 9H), 0.89 (dt, <sup>2</sup>J<sub>HH</sub> = 10.9 Hz and <sup>3</sup>J<sub>HH</sub> = 6.3 Hz, 1H), 0.70 (dt, <sup>2</sup>J<sub>HH</sub> = 10.8 Hz and <sup>3</sup>J<sub>HH</sub> = 6.4 Hz, 1H), 0.58 (dt, <sup>2</sup>J<sub>HH</sub> = 10.2 Hz and <sup>3</sup>J<sub>HH</sub> = 6.3 Hz, 1H), 0.50 (dt, <sup>2</sup>J<sub>HH</sub> = 10.3 Hz and <sup>3</sup>J<sub>HH</sub> = 6.5 Hz, 1H). <sup>13</sup>C NMR (CDCl<sub>3</sub>): δ 171.8, 170.3, 138.0, 137.9, 137.8, 128.6, 128.3, 128.23, 128.20, 127.3, 127.2, 124.5, 82.4, 61.4, 42.6, 42.3, 40.7, 27.9, 21.7, 7.8, 6.6. HRMS (ESI-TOF) calcd for C<sub>25</sub>H<sub>29</sub>NO<sub>3</sub>Na (M+Na<sup>+</sup>) 414.2040, found 414.2031.

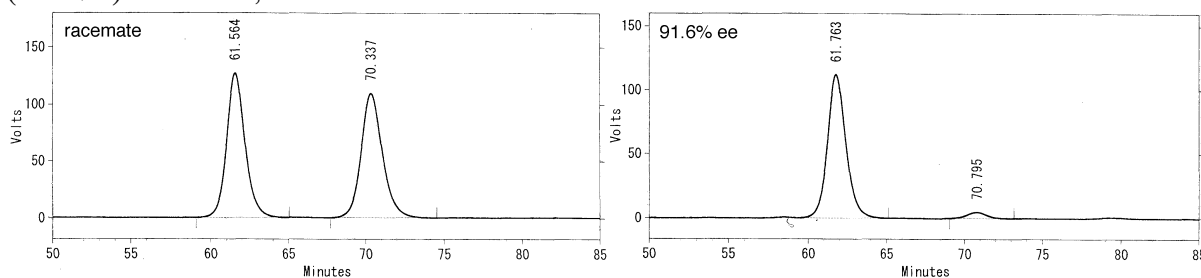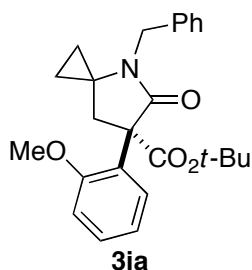

**Table 2, Entry 13.** EtOAc/hexane = 1/3 and then EtOAc/hexane/CH<sub>2</sub>Cl<sub>2</sub> = 1/4/20 were used for preparative TLC. Yellow oil. 53% yield (**3ia**/**4ia** = 97/3). The ee was determined on a Daicel Chiralcel OJ-H column with hexane/2-propanol = 80/20, flow = 0.5 mL/min. Retention times: 10.5 min [major enantiomer], 16.2 min [minor enantiomer]. 83% ee.  $[\alpha]^{25}_D$

+104 (*c* 0.85, CHCl<sub>3</sub>). The absolute configuration was assigned by analogy with Table 2, entry 5.

<sup>1</sup>H NMR (CDCl<sub>3</sub>): δ 7.33 (dd, <sup>3</sup>J<sub>HH</sub> = 7.6 Hz and <sup>4</sup>J<sub>HH</sub> = 1.6 Hz, 1H), 7.33-7.29 (m, 2H), 7.28-7.22 (m, 4H), 6.92 (td, <sup>3</sup>J<sub>HH</sub> = 7.6 Hz and <sup>4</sup>J<sub>HH</sub> = 1.1 Hz, 1H), 6.88 (d, <sup>3</sup>J<sub>HH</sub> = 8.1 Hz, 1H), 4.46 (d, <sup>2</sup>J<sub>HH</sub> = 15.9 Hz, 1H), 4.24 (d, <sup>2</sup>J<sub>HH</sub> = 15.9 Hz, 1H), 3.79 (s, 3H), 3.27 (d, <sup>2</sup>J<sub>HH</sub> = 12.8 Hz, 1H), 2.17 (d, <sup>2</sup>J<sub>HH</sub> = 12.9 Hz, 1H), 1.44 (s, 9H), 0.85 (dt, <sup>2</sup>J<sub>HH</sub> = 10.9 Hz and <sup>3</sup>J<sub>HH</sub> = 6.5 Hz, 1H), 0.67 (dt, <sup>2</sup>J<sub>HH</sub> = 10.8 Hz and <sup>3</sup>J<sub>HH</sub> = 6.5 Hz, 1H), 0.54 (dt, <sup>2</sup>J<sub>HH</sub> = 10.2 Hz and <sup>3</sup>J<sub>HH</sub> = 6.6 Hz, 1H), 0.28 (dt, <sup>2</sup>J<sub>HH</sub> = 10.1 Hz and <sup>3</sup>J<sub>HH</sub> = 6.4 Hz, 1H). <sup>13</sup>C NMR (CDCl<sub>3</sub>): δ 171.9, 169.9, 156.9, 137.8, 129.5, 128.7, 128.5, 127.9, 127.3, 127.1, 120.6, 110.9, 81.4, 60.6, 55.3, 42.6, 41.7, 40.9, 28.0, 7.8, 7.3. HRMS (ESI-TOF) calcd for C<sub>25</sub>H<sub>29</sub>NO<sub>4</sub>Na (M+Na<sup>+</sup>) 430.1989, found 430.1997.

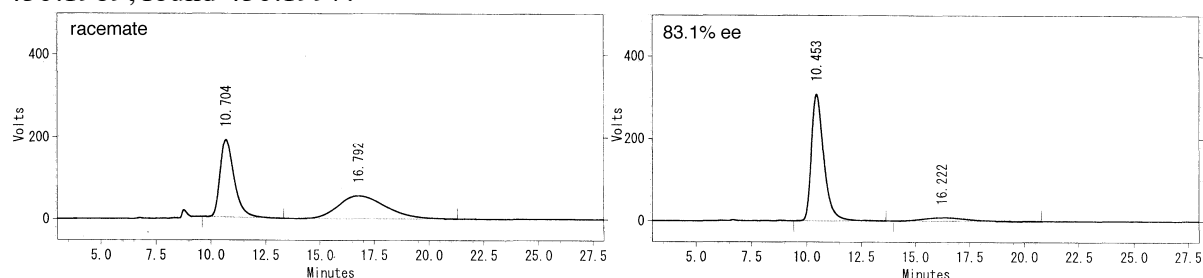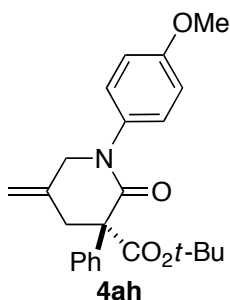

**Table 3, Entry 1.** (CAS 1086018-55-4) Et<sub>2</sub>O/CH<sub>2</sub>Cl<sub>2</sub>/hexane = 3/5/10, CH<sub>2</sub>Cl<sub>2</sub>/EtOAc/hexane = 1/2/6, and then EtOAc/hexane = 1/5 were used for preparative TLC. Pale yellow oil. 89% yield (**3ah/4ah** = 6/94). The ee was determined on a Daicel Chiralpak AD-H column with hexane/2-propanol = 85/15, flow = 0.5 mL/min. Retention times: 18.3 min [minor enantiomer], 24.0 min [major enantiomer]. 94% ee. [α]<sub>D</sub><sup>30</sup> +31.5 (*c* 1.05, CHCl<sub>3</sub>). The absolute configuration was determined by comparison of the optical rotation with the literature value.<sup>10</sup>

<sup>1</sup>H NMR (CDCl<sub>3</sub>): δ 7.40-7.37 (m, 2H), 7.35 (t, <sup>3</sup>J<sub>HH</sub> = 7.7 Hz, 2H), 7.28 (tt, <sup>3</sup>J<sub>HH</sub> = 7.1 Hz and <sup>4</sup>J<sub>HH</sub> = 1.5 Hz, 1H), 7.19 (d, <sup>3</sup>J<sub>HH</sub> = 9.0 Hz, 2H), 6.91 (d, <sup>3</sup>J<sub>HH</sub> = 9.0 Hz, 2H), 4.99 (s, 1H), 4.93 (s, 1H), 4.21 (d, <sup>2</sup>J<sub>HH</sub> = 15.6 Hz, 1H), 4.12 (d, <sup>2</sup>J<sub>HH</sub> = 15.7 Hz, 1H), 3.80 (s, 3H), 3.49 (d, <sup>2</sup>J<sub>HH</sub> = 14.9 Hz, 1H), 3.28 (d, <sup>2</sup>J<sub>HH</sub> = 14.9 Hz, 1H), 1.44 (s, 9H). <sup>13</sup>C NMR (CDCl<sub>3</sub>): δ 169.9, 169.2, 158.4, 137.4, 137.2, 135.5, 128.2, 127.9, 127.5, 127.4, 114.6, 111.9, 82.4, 60.9, 55.7, 55.6, 38.3, 27.9.

<sup>10</sup> Shintani, R.; Park, S.; Shirozu, F.; Murakami, M.; Hayashi, T. *J. Am. Chem. Soc.* **2008**, *130*, 16174.



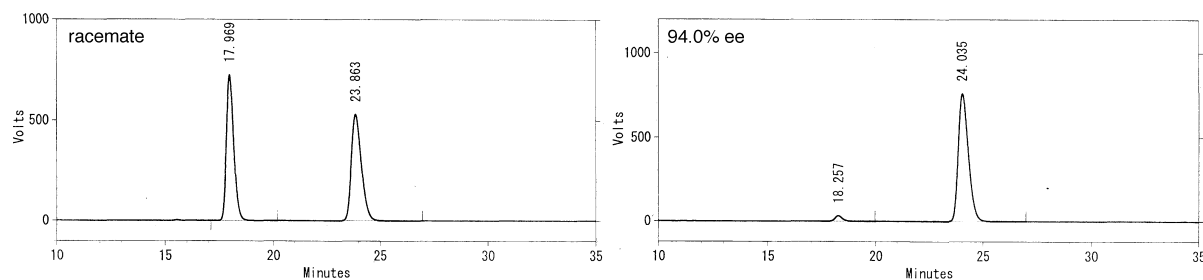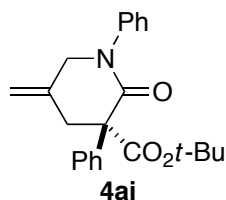

**Table 3, Entry 2.** EtOAc/hexane = 1/5 was used for preparative TLC. Pale yellow oil. 89% yield (**3ai/4ai** = 1/99). The ee was determined on a Daicel Chiralpak AD-H column with hexane/2-propanol = 85/15, flow = 0.5 mL/min. Retention times: 12.6 min [minor enantiomer], 17.8 min [major enantiomer]. 94% ee.  $[\alpha]_D^{30} +14.3$  (*c* 1.48, CHCl<sub>3</sub>). The absolute configuration was assigned by analogy with Table 3, entry 1.

<sup>1</sup>H NMR (CDCl<sub>3</sub>): δ 7.42–7.33 (m, 6H), 7.31–7.23 (m, 4H), 5.02 (s, 1H), 4.95 (s, 1H), 4.25 (d, <sup>2</sup>*J*<sub>HH</sub> = 15.6 Hz, 1H), 4.16 (d, <sup>2</sup>*J*<sub>HH</sub> = 15.6 Hz, 1H), 3.50 (d, <sup>2</sup>*J*<sub>HH</sub> = 14.8 Hz, 1H), 3.30 (d, <sup>2</sup>*J*<sub>HH</sub> = 15.0 Hz, 1H), 1.45 (s, 9H). <sup>13</sup>C NMR (CDCl<sub>3</sub>): δ 169.8, 169.1, 142.6, 137.3, 137.1, 129.3, 128.2, 127.8, 127.5, 127.0, 126.2, 112.0, 82.5, 61.0, 55.3, 38.2, 27.9. HRMS (ESI-TOF) calcd for C<sub>23</sub>H<sub>25</sub>NO<sub>3</sub>Na (M+Na<sup>+</sup>) 386.1727, found 386.1724.

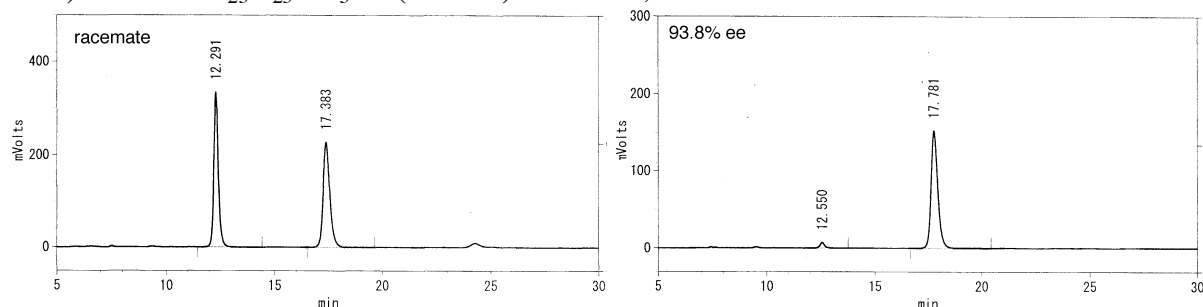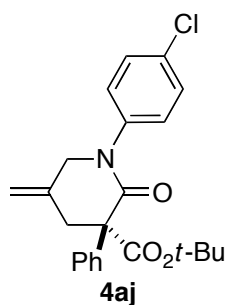

**Table 3, Entry 3.** (CAS 1086018-59-8) CH<sub>2</sub>Cl<sub>2</sub>/EtOAc/hexane = 1/2/20 was used for preparative TLC. Pale yellow oil. 95% yield (**3aj/4aj** < 1/99). The ee was determined on a Daicel Chiralpak AD-H column with hexane/2-propanol = 85/15, flow = 0.5 mL/min. Retention times: 15.6 min [minor enantiomer], 20.6 min [major enantiomer]. 94% ee.  $[\alpha]_D^{25} +23.6$  (*c* 0.90, CHCl<sub>3</sub>). The absolute configuration was determined by comparison of the optical rotation with the literature value.<sup>10</sup>

<sup>1</sup>H NMR (CDCl<sub>3</sub>): δ 7.39–7.32 (m, 6H), 7.32–7.27 (m, 1H), 7.23 (d, <sup>3</sup>*J*<sub>HH</sub> = 8.6 Hz, 2H), 5.03 (s, 1H), 4.97 (s, 1H), 4.22 (d, <sup>2</sup>*J*<sub>HH</sub> = 15.4 Hz, 1H), 4.15 (d, <sup>2</sup>*J*<sub>HH</sub> = 15.5 Hz, 1H), 3.47 (d,

$^2J_{\text{HH}} = 14.6 \text{ Hz}$ , 1H), 3.30 (d,  $^2J_{\text{HH}} = 14.9 \text{ Hz}$ , 1H), 1.44 (s, 9H).  $^{13}\text{C}$  NMR ( $\text{CDCl}_3$ ):  $\delta$  169.7, 169.1, 141.0, 136.9, 132.5, 129.3, 128.2, 127.7, 127.6, 127.5, 112.3, 82.5, 61.0, 55.1, 38.1, 27.9.

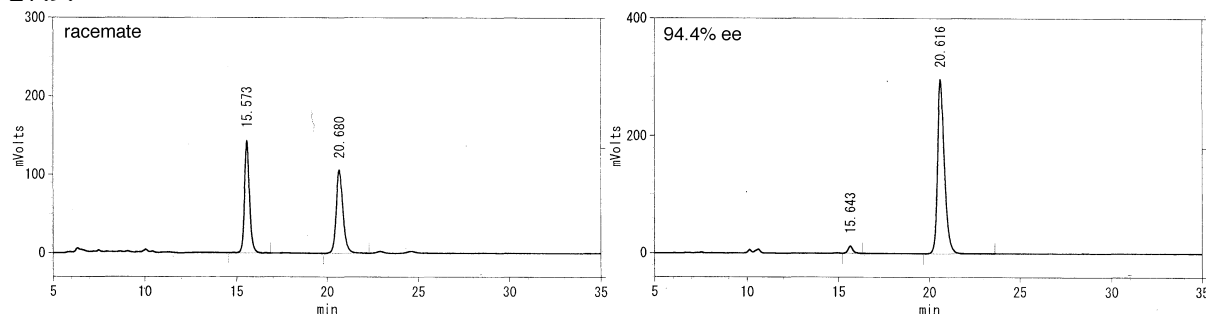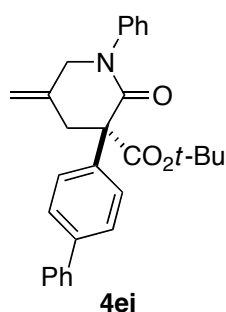

**Table 3, Entry 4.** EtOAc/hexane/ $\text{CH}_2\text{Cl}_2$  = 1/20/60 and then EtOAc/toluene = 1/10 were used for preparative TLC. White solid. 91% yield (**3ei/4ei** = 1/99). The ee was determined on a Daicel Chiralpak AD-H column with hexane/2-propanol = 85/15, flow = 0.8 mL/min. Retention times: 14.5 min [minor enantiomer], 36.3 min [major enantiomer]. 94% ee.  $[\alpha]_{\text{D}}^{25} +10.2$  ( $c$  1.10,  $\text{CHCl}_3$ ). The absolute configuration was assigned by analogy with Table 3, entry 1.

$^1\text{H}$  NMR ( $\text{CDCl}_3$ ):  $\delta$  7.64-7.56 (m, 4H), 7.48 (d,  $^3J_{\text{HH}} = 8.4 \text{ Hz}$ , 2H), 7.46-7.38 (m, 4H), 7.34 (tt,  $^3J_{\text{HH}} = 7.3 \text{ Hz}$  and  $^4J_{\text{HH}} = 1.1 \text{ Hz}$ , 1H), 7.32-7.24 (m, 3H), 5.07 (s, 1H), 4.99 (s, 1H), 4.28 (d,  $^2J_{\text{HH}} = 15.6 \text{ Hz}$ , 1H), 4.22 (d,  $^2J_{\text{HH}} = 15.7 \text{ Hz}$ , 1H), 3.53 (d,  $^2J_{\text{HH}} = 14.9 \text{ Hz}$ , 1H), 3.35 (d,  $^2J_{\text{HH}} = 14.8 \text{ Hz}$ , 1H), 1.48 (s, 9H).  $^{13}\text{C}$  NMR ( $\text{CDCl}_3$ ):  $\delta$  169.9, 169.0, 142.6, 140.8, 140.3, 137.3, 136.1, 129.3, 128.8, 128.3, 127.4, 127.2, 127.1, 126.9, 126.2, 112.2, 82.6, 60.7, 55.4, 38.2, 28.0. HRMS (ESI-TOF) calcd for  $\text{C}_{29}\text{H}_{29}\text{NO}_3\text{Na}$  ( $\text{M}+\text{Na}^+$ ) 462.2040, found 462.2037.

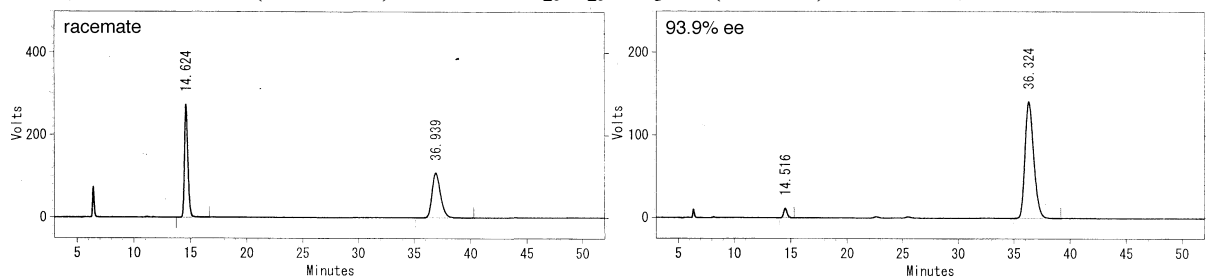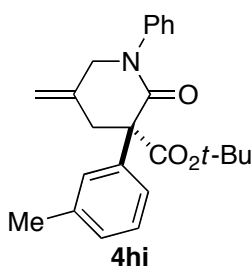

**Table 3, Entry 5.** EtOAc/hexane = 1/3 was used for preparative TLC. Pale yellow oil. 91% yield (**3hi/4hi** = 1/99). The ee was determined on a Daicel Chiralpak AD-H column with hexane/2-propanol = 85/15, flow = 0.5 mL/min. Retention times: 13.0 min [minor enantiomer], 16.1 min [major enantiomer]. 93% ee.  $[\alpha]_D^{25} +7.5$  (*c* 1.06, CHCl<sub>3</sub>). The absolute configuration was assigned by analogy with Table 3, entry 1.

<sup>1</sup>H NMR (CDCl<sub>3</sub>): δ 7.42-7.36 (m, 2H), 7.31-7.22 (m, 4H), 7.22-7.16 (m, 2H), 7.10 (d, <sup>3</sup>J<sub>HH</sub> = 7.3 Hz, 1H), 5.02 (s, 1H), 4.95 (s, 1H), 4.24 (d, <sup>2</sup>J<sub>HH</sub> = 15.6 Hz, 1H), 4.18 (d, <sup>2</sup>J<sub>HH</sub> = 15.6 Hz, 1H), 3.47 (d, <sup>2</sup>J<sub>HH</sub> = 15.0 Hz, 1H), 3.30 (d, <sup>2</sup>J<sub>HH</sub> = 14.9 Hz, 1H), 2.35 (s, 3H), 1.46 (s, 9H). <sup>13</sup>C NMR (CDCl<sub>3</sub>): δ 169.9, 169.1, 142.6, 137.6, 137.4, 136.9, 129.2, 128.6, 128.3, 128.1, 127.0, 126.2, 124.8, 111.9, 82.4, 60.9, 55.3, 38.2, 27.9, 21.7. HRMS (ESI-TOF) calcd for C<sub>24</sub>H<sub>27</sub>NO<sub>3</sub>Na (M+Na<sup>+</sup>) 400.1883, found 400.1876.

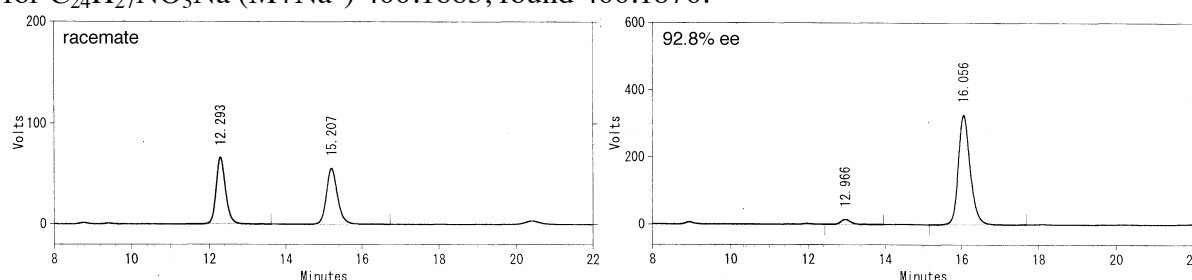

### Procedure for Equation 1.

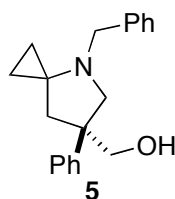

A solution of compound **3aa** (111 mg, 0.266 mmol of **3aa**; **3aa/4aa** = 93/7, 92% ee) in Et<sub>2</sub>O (5.0 mL) was added to a suspension of LiAlH<sub>4</sub> (109 mg, 2.87 mmol) in Et<sub>2</sub>O (1.0 mL) at -30 °C, and the mixture was stirred for 72 h at -20 °C. The reaction mixture was cooled to -50 °C and slowly quenched with saturated NaCl<sub>aq</sub>. After extraction with CH<sub>2</sub>Cl<sub>2</sub>, the organic layer was washed with saturated NaCl<sub>aq</sub>, dried over Na<sub>2</sub>SO<sub>4</sub>, filtered, and concentrated under vacuum. The residue was chromatographed on silica gel with EtOAc/hexane = 1/5→1/4 to afford compound **5** as a pale yellow oil (68.1 mg, 0.232 mmol; 87% yield). The ee was determined on a Daicel Chiralpak AS-H column with hexane/2-propanol = 85/15, flow = 0.5 mL/min. Retention times: 10.5 min [minor enantiomer], 12.3 min [major enantiomer]. 91% ee.  $[\alpha]_D^{25} +147$  (*c* 1.10, CH<sub>2</sub>Cl<sub>2</sub>).

<sup>1</sup>H NMR (C<sub>6</sub>D<sub>6</sub>): δ 7.25 (d, <sup>3</sup>J<sub>HH</sub> = 7.2 Hz, 2H), 7.19 (t, <sup>3</sup>J<sub>HH</sub> = 7.6 Hz, 2H), 7.13-7.05 (m, 3H), 7.03 (tt, <sup>3</sup>J<sub>HH</sub> = 7.3 Hz and <sup>4</sup>J<sub>HH</sub> = 1.4 Hz, 1H), 6.90-6.86 (m, 2H), 3.71 (d, <sup>2</sup>J<sub>HH</sub> = 10.1 Hz, 1H), 3.63 (dd, <sup>2</sup>J<sub>HH</sub> = 10.1 Hz and <sup>4</sup>J<sub>HH</sub> = 1.2 Hz, 1H), 3.24 (d, <sup>2</sup>J<sub>HH</sub> = 8.9 Hz, 1H), 3.16 (d, <sup>2</sup>J<sub>HH</sub> = 13.0 Hz, 1H), 2.76 (d, <sup>2</sup>J<sub>HH</sub> = 13.0 Hz, 1H), 2.70 (dd, <sup>2</sup>J<sub>HH</sub> = 8.9 Hz and <sup>4</sup>J<sub>HH</sub> = 1.1 Hz, 1H), 2.47 (d, <sup>2</sup>J<sub>HH</sub> = 12.4 Hz, 1H), 2.10 (d, <sup>2</sup>J<sub>HH</sub> = 12.6 Hz, 1H), 1.46-1.16 (m, 1H), 0.75 (dt, <sup>2</sup>J<sub>HH</sub> = 10.7 Hz and <sup>3</sup>J<sub>HH</sub> = 5.9 Hz, 1H), 0.62 (dt, <sup>2</sup>J<sub>HH</sub> = 10.8 Hz and <sup>3</sup>J<sub>HH</sub> = 6.1 Hz, 1H), 0.49 (dt, <sup>2</sup>J<sub>HH</sub> = 10.1 Hz and <sup>3</sup>J<sub>HH</sub> = 6.0 Hz, 1H), 0.03 (dt, <sup>2</sup>J<sub>HH</sub> = 10.0 Hz and <sup>3</sup>J<sub>HH</sub> = 6.0 Hz, 1H). <sup>13</sup>C NMR (C<sub>6</sub>D<sub>6</sub>): δ 145.9, 139.7, 128.8, 128.7, 128.5, 127.4, 127.1, 126.4, 74.1, 62.9, 53.9, 49.8, 46.5, 44.3, 7.3, 7.0. HRMS (ESI-TOF) calcd for C<sub>20</sub>H<sub>24</sub>NO (M+H<sup>+</sup>) 294.1852, found 294.1851.

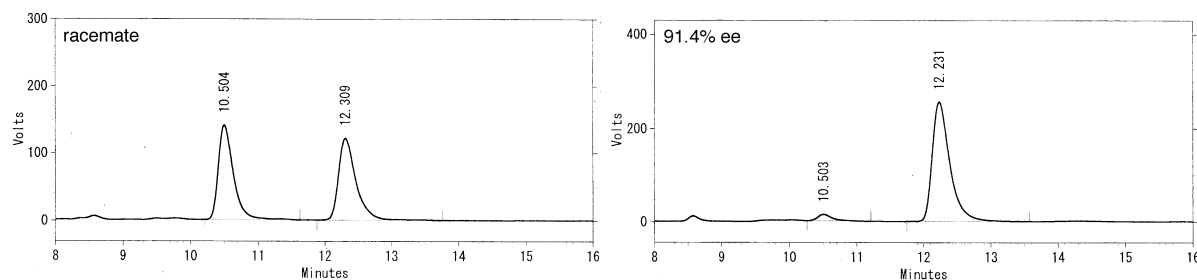

## Procedure for Equation 2.

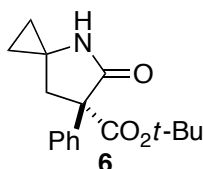

A solution of compound **3ag** (76.2 mg, 0.197 mmol; 92% ee) in THF (1.50 mL) was added to a suspension of NaH (15.7 mg, 0.393 mmol; 60 wt% in mineral oil) in THF (0.50 mL) at 0 °C, and the mixture was stirred for 5 h at 50 °C. The reaction mixture was diluted with Et<sub>2</sub>O and quenched with H<sub>2</sub>O. After extraction with Et<sub>2</sub>O, the organic layer was washed with saturated NaCl(aq), dried over MgSO<sub>4</sub>, filtered, and concentrated under vacuum. The residue was purified by silica gel preparative TLC with EtOAc/hexane = 1/2 to afford compound **6** as a white solid (52.6 mg, 0.184 mmol; 93% yield). The ee was determined on a Daicel Chiralcel OD-H column with hexane/2-propanol = 80/20, flow = 0.5 mL/min. Retention times: 10.4 min [major enantiomer], 13.4 min [minor enantiomer]. 92% ee. [ $\alpha$ ]<sub>D</sub><sup>25</sup> +3.9 (c 1.11, CHCl<sub>3</sub>).

<sup>1</sup>H NMR (CDCl<sub>3</sub>):  $\delta$  7.52-7.47 (m, 2H), 7.37-7.32 (m, 2H), 7.28 (tt, <sup>3</sup>J<sub>HH</sub> = 7.3 Hz and <sup>4</sup>J<sub>HH</sub> = 1.3 Hz, 1H), 6.37 (bs, 1H), 2.91 (d, <sup>2</sup>J<sub>HH</sub> = 12.5 Hz, 1H), 2.65 (d, <sup>2</sup>J<sub>HH</sub> = 12.7 Hz, 1H), 1.46 (s, 9H), 0.86-0.76 (m, 3H), 0.70-0.61 (m, 1H). <sup>13</sup>C NMR (CDCl<sub>3</sub>):  $\delta$  174.2, 170.0, 138.4, 128.4, 127.44, 127.38, 82.4, 62.6, 42.9, 36.8, 27.9, 11.4, 9.8. HRMS (ESI-TOF) calcd for C<sub>17</sub>H<sub>21</sub>NO<sub>3</sub>Na (M+Na<sup>+</sup>) 310.1414, found 310.1419.

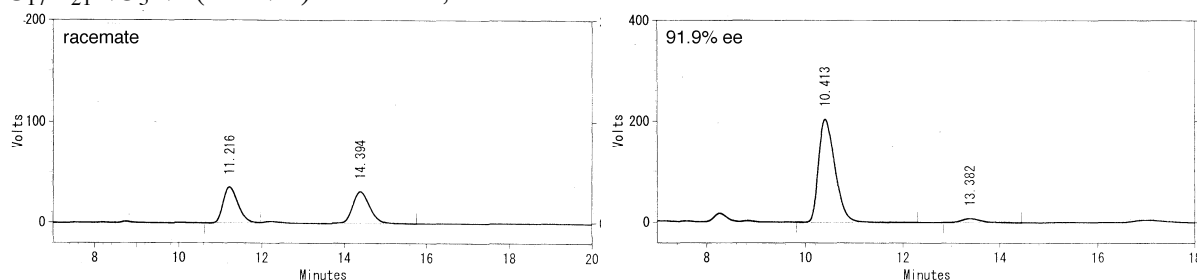

#### IV. X-ray Crystal Structure of (*S*)-**3af**

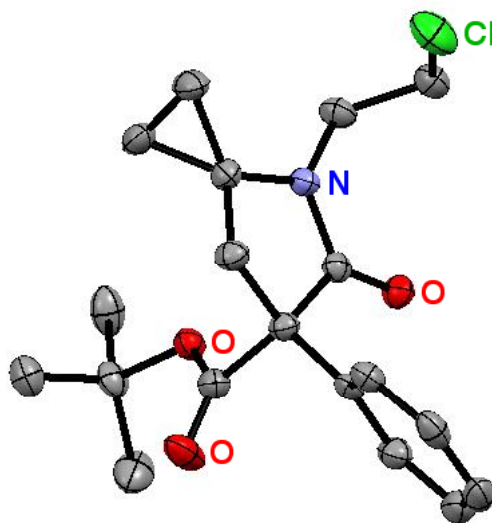

##### Data Collection

A colorless Et<sub>2</sub>O solution of (*S*)-**3af** was prepared at room temperature. Crystals suitable for X-ray analysis were obtained by slow evaporation of the solvent at room temperature.

A colorless prism crystal of C<sub>19</sub>H<sub>24</sub>ClNO<sub>3</sub> having approximate dimensions of 0.50 x 0.40 x 0.20 mm was mounted on a glass fiber. All measurements were made on a Rigaku RAXIS RAPID imaging plate area detector with graphite monochromated Cu-K $\alpha$  radiation.

Indexing was performed from 3 oscillations that were exposed for 15 seconds. The crystal-to-detector distance was 127.40 mm.

Cell constants and an orientation matrix for data collection corresponded to a primitive monoclinic cell with dimensions:

$$\begin{aligned} a &= 8.71555(18) \text{ \AA} \\ b &= 8.71796(19) \text{ \AA} & \beta &= 104.9876(14)^\circ \\ c &= 12.4456(3) \text{ \AA} \\ V &= 913.47(3) \text{ \AA}^3 \end{aligned}$$

For  $Z = 2$  and F.W. = 349.86, the calculated density is 1.272 g/cm<sup>3</sup>. Based on the systematic absences of:

$$0k0: k \pm 2n$$

packing considerations, a statistical analysis of intensity distribution, and the successful solution and refinement of the structure, the space group was determined to be:

$$P2_1 (\#4)$$

The data were collected at a temperature of  $-180 \pm 1$  °C to a maximum  $2\theta$  value of 136.4°. A total of 30 oscillation images were collected. A sweep of data was done using  $\omega$  scans from 80.0 to 260.0° in 30.0° step, at  $\chi = 54.0^\circ$  and  $\phi = 0.0^\circ$ . The exposure rate was 10.0 [sec./°]. A second sweep was performed using  $\omega$  scans from 80.0 to 260.0° in 30.0° step, at  $\chi = 54.0^\circ$  and  $\phi = 90.0^\circ$ . The exposure rate was 10.0 [sec./°]. Another sweep was performed using  $\omega$  scans from 80.0 to 260.0° in 30.0° step, at  $\chi = 54.0^\circ$  and  $\phi = 180.0^\circ$ . The exposure

rate was 10.0 [sec./°]. Another sweep was performed using  $\omega$  scans from 80.0 to 260.0° in 30.0° step, at  $\chi = 54.0^\circ$  and  $\phi = 270.0^\circ$ . The exposure rate was 10.0 [sec./°]. Another sweep was performed using  $\omega$  scans from 80.0 to 260.0° in 30.0° step, at  $\chi = 0.0^\circ$  and  $\phi = 0.0^\circ$ . The exposure rate was 10.0 [sec./°]. The crystal-to-detector distance was 127.40 mm. Readout was performed in the 0.100 mm pixel mode.

### Data Reduction

Of the 9740 reflections that were collected, 3224 were unique ( $R_{\text{int}} = 0.057$ ).

The linear absorption coefficient,  $\mu$ , for Cu-K $\alpha$  radiation is 19.823 cm<sup>-1</sup>. An empirical absorption correction was applied which resulted in transmission factors ranging from 0.564 to 0.673. The data were corrected for Lorentz and polarization effects.

### Structure Solution and Refinement

The structure was solved by direct methods<sup>11</sup> and expanded using Fourier techniques.<sup>12</sup> The non-hydrogen atoms were refined anisotropically. Hydrogen atoms were refined using the riding model. The final cycle of full-matrix least-squares refinement<sup>13</sup> on  $F^2$  was based on 3224 observed reflections and 219 variable parameters and converged (largest parameter shift was 0.00 times its esd) with unweighted and weighted agreement factors of:

$$R1 = \Sigma ||F_o| - |F_c|| / \Sigma |F_o| = 0.0404$$

$$wR2 = [\Sigma w (F_o^2 - F_c^2)^2 / \Sigma w (F_o^2)^2]^{1/2} = 0.1020$$

The standard deviation of an observation of unit weight<sup>14</sup> was 1.04. A Chebychev polynomial weighting scheme was used.<sup>15</sup> The maximum and minimum peaks on the final difference Fourier map corresponded to 0.19 and -0.25 e<sup>-</sup>/Å<sup>3</sup>, respectively. The absolute structure was deduced based on Flack parameter, 0.040(15), refined using 1446 Friedel pairs.<sup>16</sup>

Neutral atom scattering factors were taken from Cromer and Waber.<sup>17</sup> Anomalous dispersion effects were included in  $F_{\text{calc}}$ ;<sup>18</sup> the values for  $\Delta f'$  and  $\Delta f''$  were those of Creagh

<sup>11</sup> SIR92: Altomare, A.; Cascarano, G.; Giacovazzo, C.; Guagliardi, A.; Burla, M.; Polidori, G.; Camalli, M. *J. Appl. Cryst.* **1994**, 27, 435.

<sup>12</sup> DIRDIF99: Beurskens, P. T.; Admiraal, G.; Beurskens, G.; Bosman, W. P.; de Gelder, R.; Israel, R.; Smits, J. M. M. The DIRDIF-99 program system, Technical Report of the Crystallography Laboratory, University of Nijmegen, The Netherlands (1999).

<sup>13</sup> Least Squares function minimized: (SHELXL97)

$$\Sigma w(F_o^2 - F_c^2)^2 \quad \text{where } w = \text{Least Squares weights.}$$

<sup>14</sup> Standard deviation of an observation of unit weight:

$$[\Sigma w(F_o^2 - F_c^2)^2 / (N_o - N_v)]^{1/2}$$

where:  $N_o$  = number of observations,  $N_v$  = number of variables

<sup>15</sup> Carruthers, J. R.; Watkin, D. J. *Acta Crystallogr.* **1979**, A35, 698.

<sup>16</sup> Flack, H. D. *Acta Crystallogr.* **1983**, A39, 876.

<sup>17</sup> Cromer, D. T.; Waber, J. T. "International Tables for X-ray Crystallography", Vol. IV, The Kynoch Press, Birmingham, England, Table 2.2 A (1974).

<sup>18</sup> Ibers, J. A.; Hamilton, W. C. *Acta Crystallogr.* **1964**, 17, 781.

and McAuley.<sup>19</sup> The values for the mass attenuation coefficients are those of Creagh and Hubbell.<sup>20</sup> All calculations were performed using the CrystalStructure<sup>21</sup> crystallographic software package except for refinement, which was performed using SHELXL-97.<sup>22</sup>

The crystal structure has been deposited at the Cambridge Crystallographic Data Centre (deposition number: CCDC 892796). The data can be obtained free of charge via the Internet at [www.ccdc.cam.ac.uk/conts/retrieving.html](http://www.ccdc.cam.ac.uk/conts/retrieving.html).

---

<sup>19</sup> Creagh, D. C.; McAuley, W. J. "International Tables for Crystallography", Vol C, (A. J. C. Wilson, ed.), Kluwer Academic Publishers, Boston, Table 4.2.6.8, pages 219–222 (1992).

<sup>20</sup> Creagh, D. C.; Hubbell, J. H. "International Tables for Crystallography", Vol C, (A. J. C. Wilson, ed.), Kluwer Academic Publishers, Boston, Table 4.2.4.3, pages 200–206 (1992).

<sup>21</sup> CrystalStructure 3.8: Crystal Structure Analysis Package, Rigaku and Rigaku Americas (2000–2007). 9009 New Trails Dr. The Woodlands TX 77381 USA.

<sup>22</sup> SHELXL97: Sheldrick, G. M. (1997).



## Experimental Details

### A. Crystal Data

|                      |                                                                                                                 |
|----------------------|-----------------------------------------------------------------------------------------------------------------|
| Empirical Formula    | C <sub>19</sub> H <sub>24</sub> ClNO <sub>3</sub>                                                               |
| Formula Weight       | 349.86                                                                                                          |
| Crystal Color, Habit | colorless, prism                                                                                                |
| Crystal Dimensions   | 0.50 X 0.40 X 0.20 mm                                                                                           |
| Crystal System       | monoclinic                                                                                                      |
| Lattice Type         | Primitive                                                                                                       |
| Indexing Images      | 3 oscillations @ 15.0 seconds                                                                                   |
| Detector Position    | 127.40 mm                                                                                                       |
| Pixel Size           | 0.100 mm                                                                                                        |
| Lattice Parameters   | a = 8.71555(18) Å<br>b = 8.71796(19) Å<br>c = 12.4456(3) Å<br>β = 104.9876(14)°<br>V = 913.46(3) Å <sup>3</sup> |
| Space Group          | P2 <sub>1</sub> (#4)                                                                                            |
| Z value              | 2                                                                                                               |
| D <sub>calc</sub>    | 1.272 g/cm <sup>3</sup>                                                                                         |
| F <sub>000</sub>     | 372.00                                                                                                          |
| μ(CuKα)              | 19.823 cm <sup>-1</sup>                                                                                         |

## B. Intensity Measurements

|                                                           |                                                                                 |
|-----------------------------------------------------------|---------------------------------------------------------------------------------|
| Diffractometer                                            | Rigaku RAXIS-RAPID                                                              |
| Radiation                                                 | CuK $\alpha$ ( $\lambda = 1.54187 \text{ \AA}$ )<br>graphite monochromated      |
| Detector Aperture                                         | 460 mm x 256 mm                                                                 |
| Data Images                                               | 30 exposures                                                                    |
| $\omega$ oscillation Range ( $\chi=54.0$ , $\phi=0.0$ )   | 80.0 - 260.0°                                                                   |
| Exposure Rate                                             | 10.0 sec./°                                                                     |
| $\omega$ oscillation Range ( $\chi=54.0$ , $\phi=90.0$ )  | 80.0 - 260.0°                                                                   |
| Exposure Rate                                             | 10.0 sec./°                                                                     |
| $\omega$ oscillation Range ( $\chi=54.0$ , $\phi=180.0$ ) | 80.0 - 260.0°                                                                   |
| Exposure Rate                                             | 10.0 sec./°                                                                     |
| $\omega$ oscillation Range ( $\chi=54.0$ , $\phi=270.0$ ) | 80.0 - 260.0°                                                                   |
| Exposure Rate                                             | 10.0 sec./°                                                                     |
| $\omega$ oscillation Range ( $\chi=0.0$ , $\phi=0.0$ )    | 80.0 - 260.0°                                                                   |
| Exposure Rate                                             | 10.0 sec./°                                                                     |
| Detector Position                                         | 127.40 mm                                                                       |
| Pixel Size                                                | 0.100 mm                                                                        |
| $2\theta_{\text{max}}$                                    | 136.4°                                                                          |
| No. of Reflections Measured                               | Total: 9740<br>Unique: 3224 ( $R_{\text{int}} = 0.057$ )<br>Friedel pairs: 1446 |
| Corrections                                               | Lorentz-polarization<br>Absorption<br>(trans. factors: 0.564 - 0.673)           |

### C. Structure Solution and Refinement

|                                       |                                                                                                    |
|---------------------------------------|----------------------------------------------------------------------------------------------------|
| Structure Solution                    | Direct Methods (SIR92)                                                                             |
| Refinement                            | Full-matrix least-squares on $F^2$                                                                 |
| Function Minimized                    | $\Sigma w (F_o^2 - F_c^2)^2$                                                                       |
| Least Squares Weights                 | $w = 1/[\sigma^2(F_o^2) + (0.0535P)^2 + 0.0256P]$<br>where $P = (\text{Max}(F_o^2, 0) + 2F_c^2)/3$ |
| $2\theta_{\text{max}}$ cutoff         | 136.4°                                                                                             |
| Anomalous Dispersion                  | All non-hydrogen atoms                                                                             |
| No. Observations (All reflections)    | 3224                                                                                               |
| No. Variables                         | 219                                                                                                |
| Reflection/Parameter Ratio            | 14.72                                                                                              |
| Residuals: R1 ( $I > 2.00\sigma(I)$ ) | 0.0404                                                                                             |
| Residuals: R (All reflections)        | 0.0459                                                                                             |
| Residuals: wR2 (All reflections)      | 0.1020                                                                                             |
| Goodness of Fit Indicator             | 1.036                                                                                              |
| Flack Parameter                       | 0.040(15)                                                                                          |
| Max Shift/Error in Final Cycle        | 0.004                                                                                              |
| Maximum peak in Final Diff. Map       | 0.19 e <sup>-</sup> /Å <sup>3</sup>                                                                |
| Minimum peak in Final Diff. Map       | -0.25 e <sup>-</sup> /Å <sup>3</sup>                                                               |

# V. $^1\text{H}$ and $^{13}\text{C}$ NMR Spectra

compound **1e**

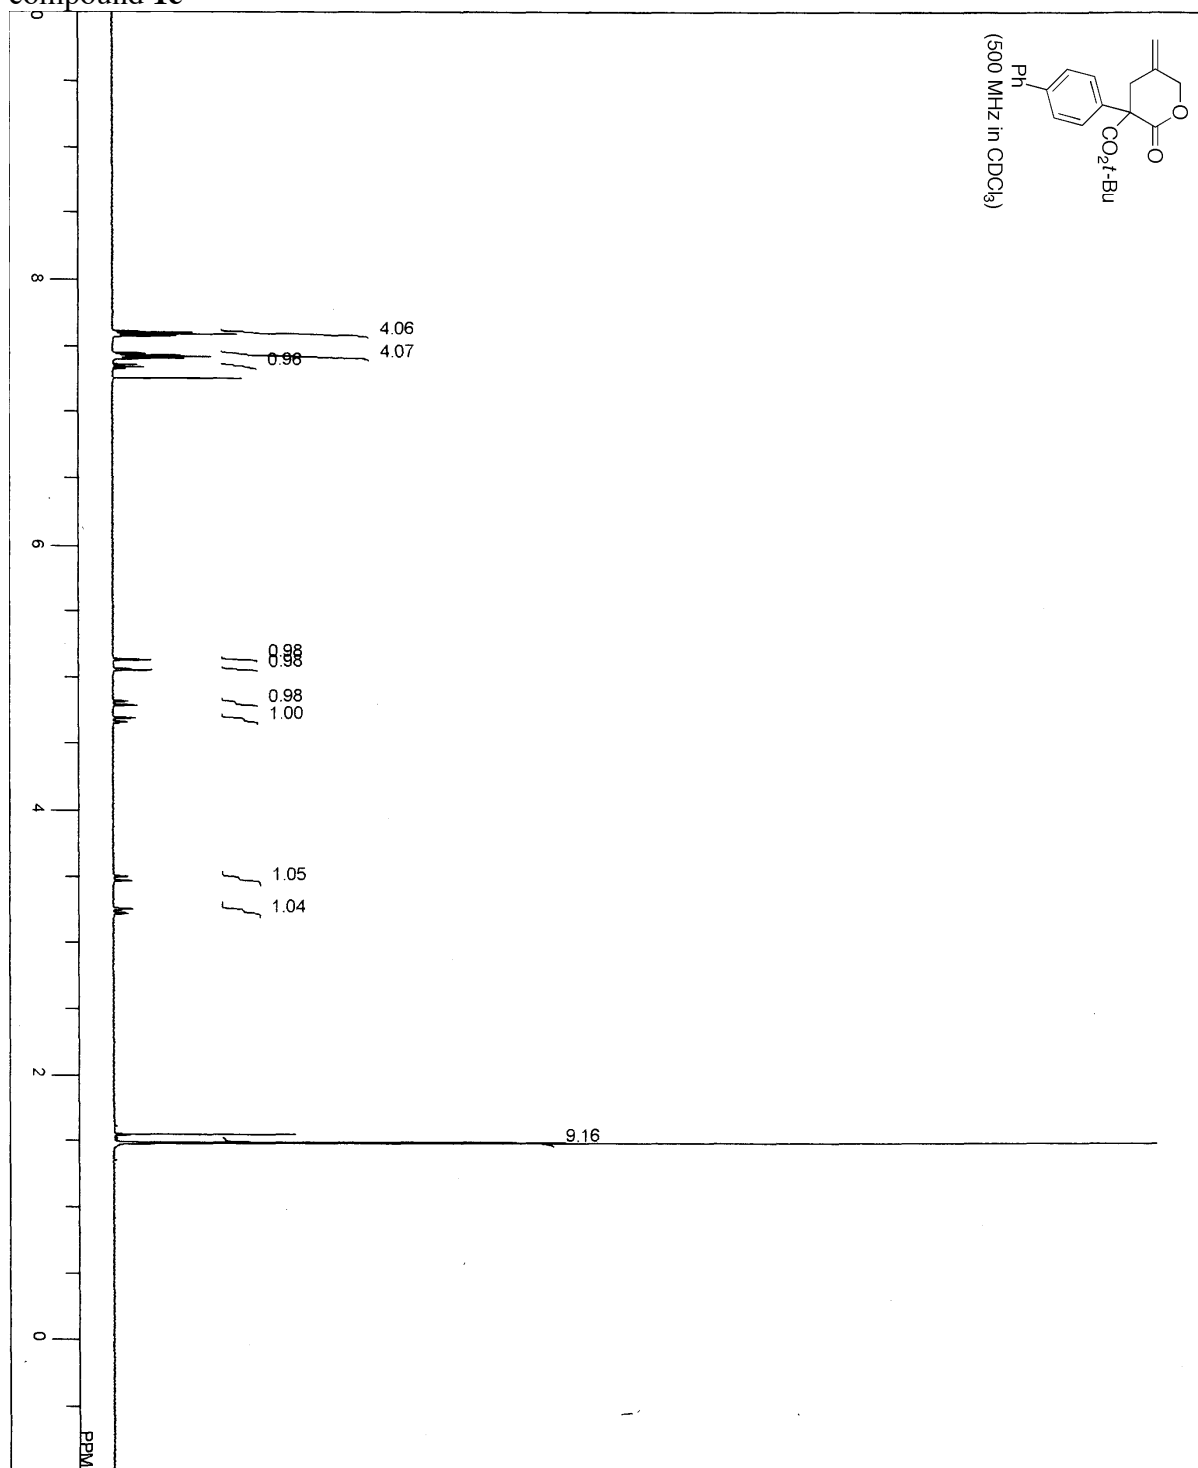

compound **1e**

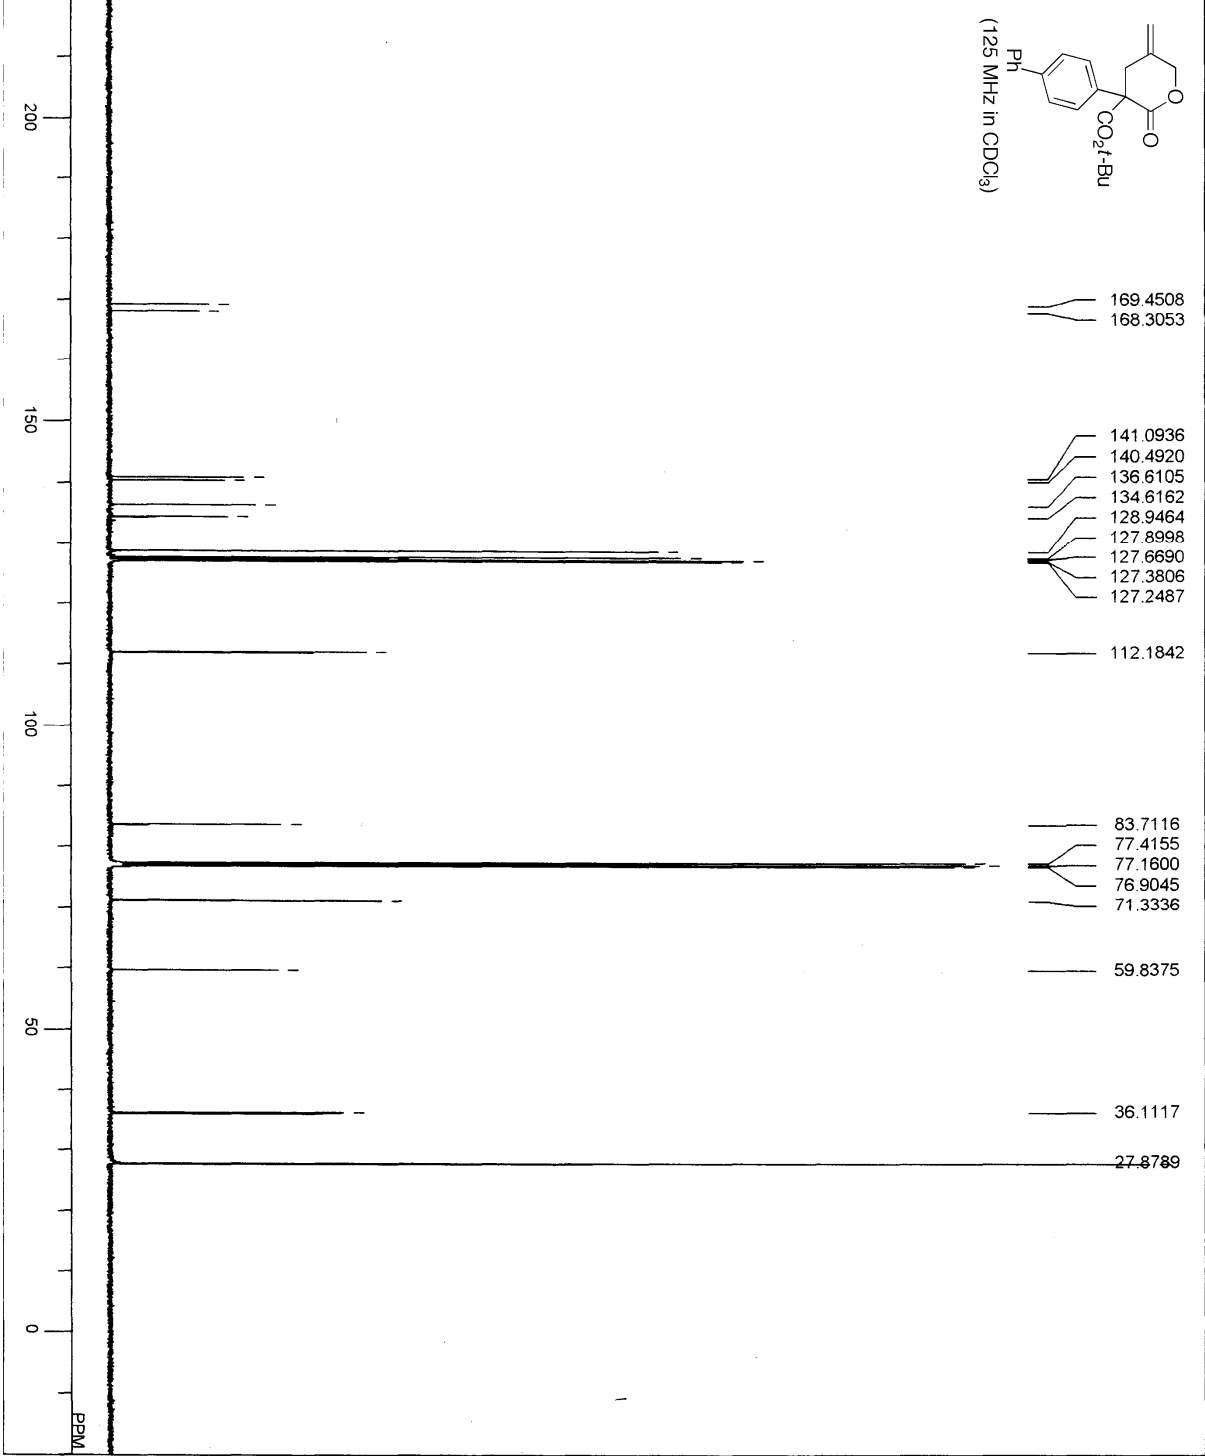

compound **1f**

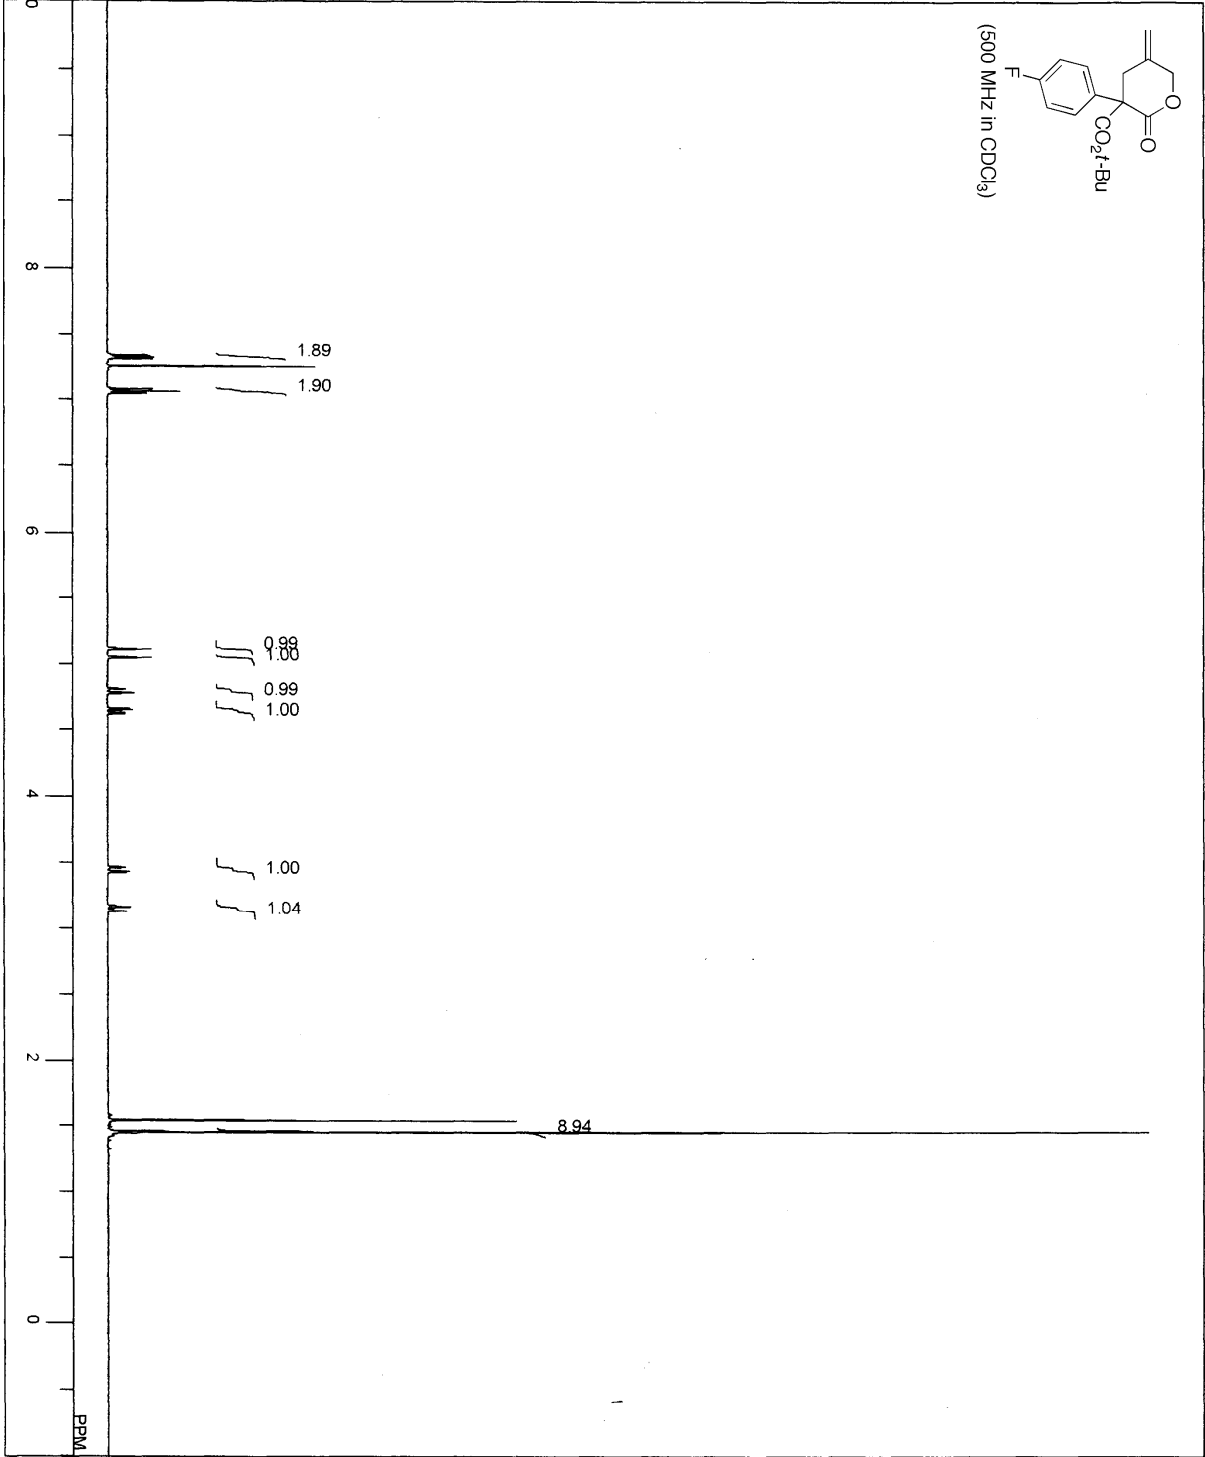

compound **1f**

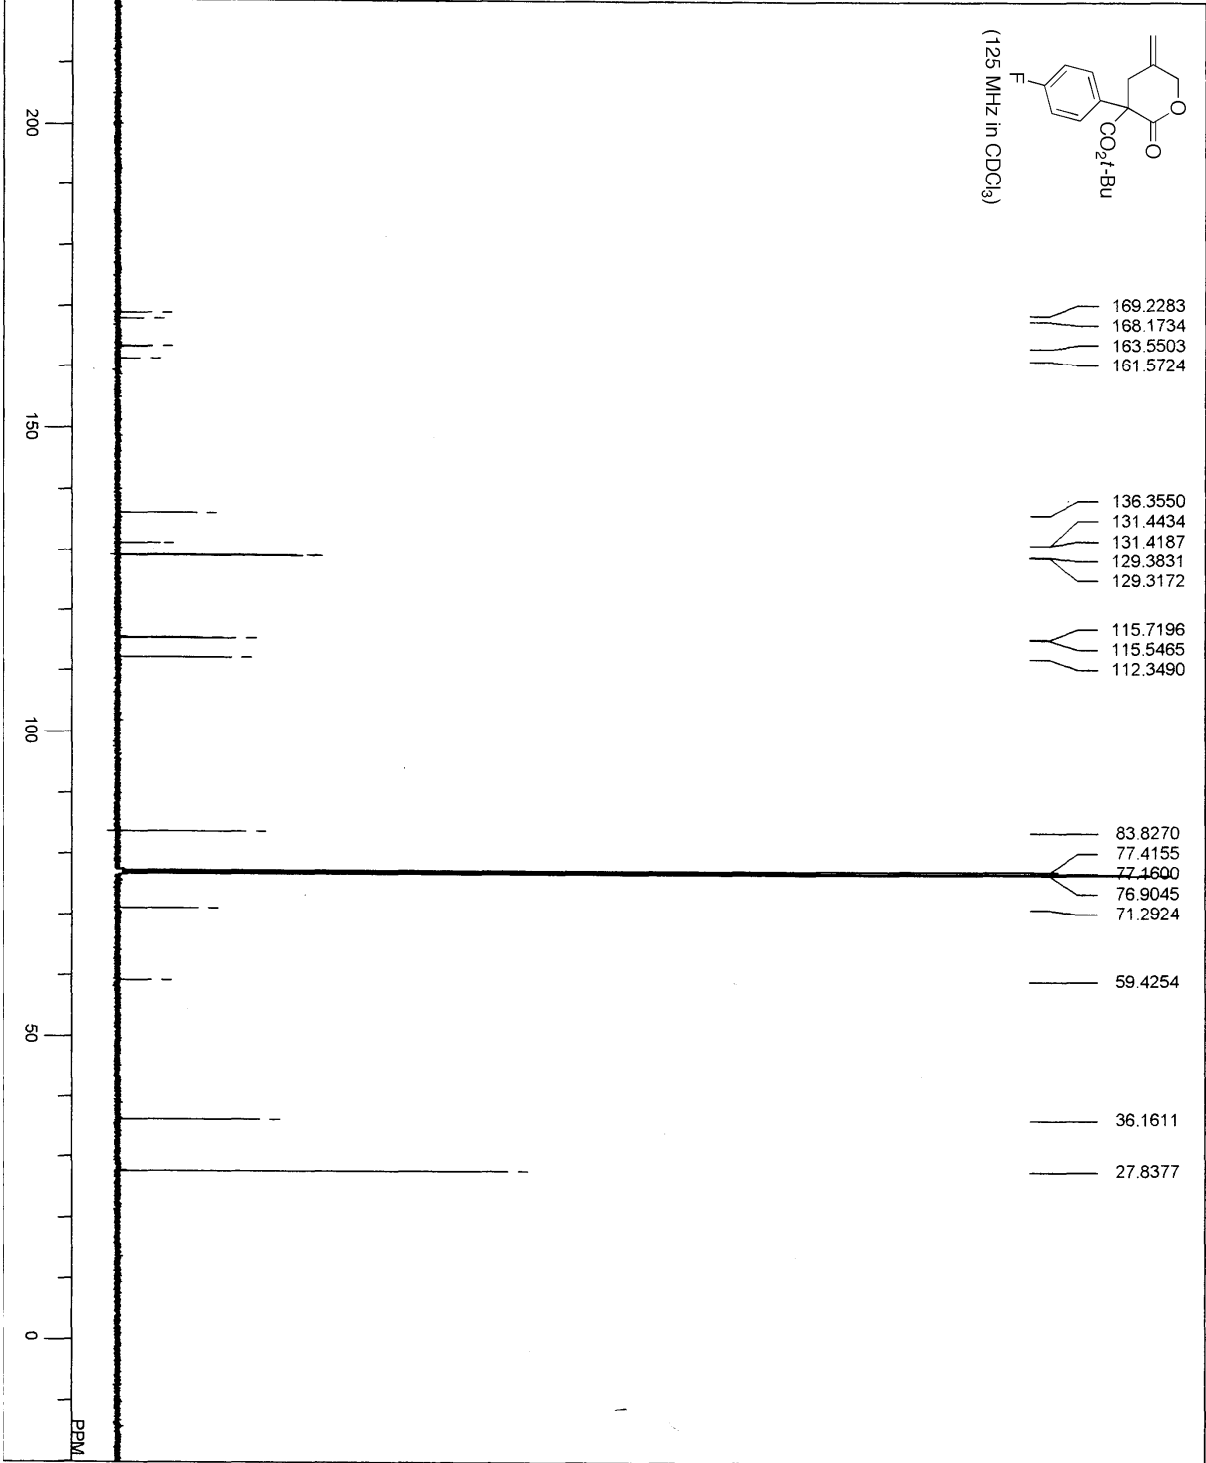



compound **1g**

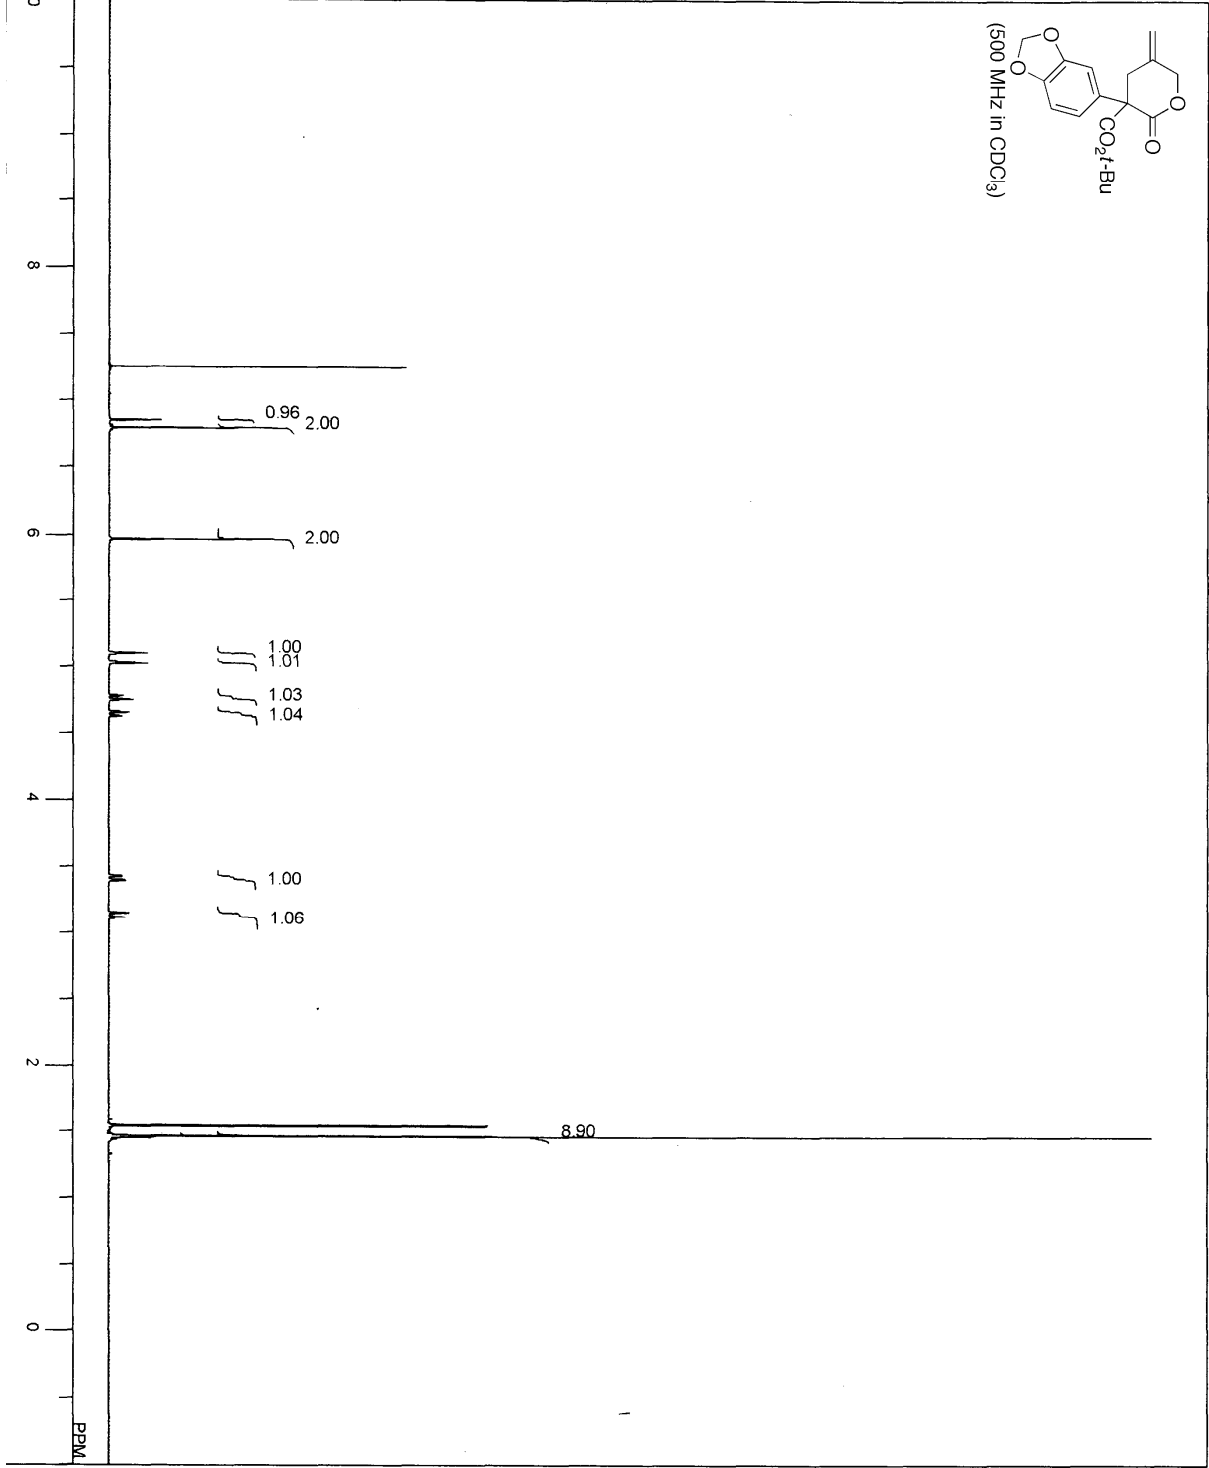

compound **1g**

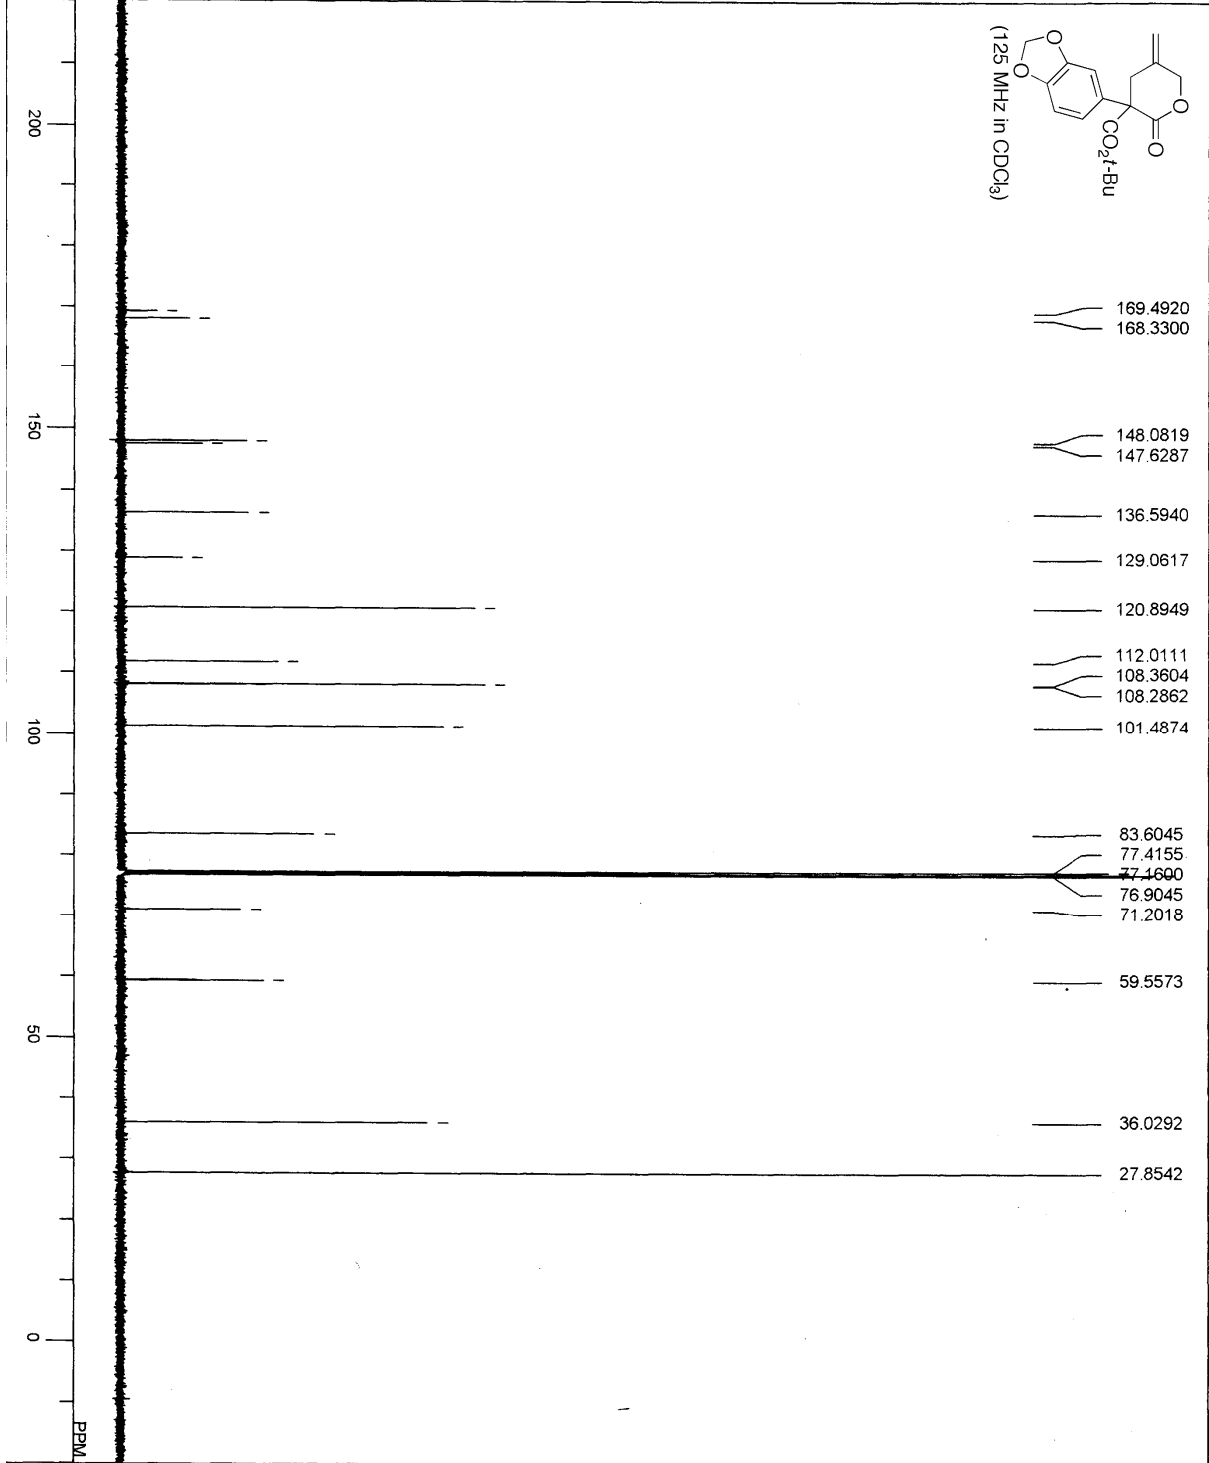

compound **1i**

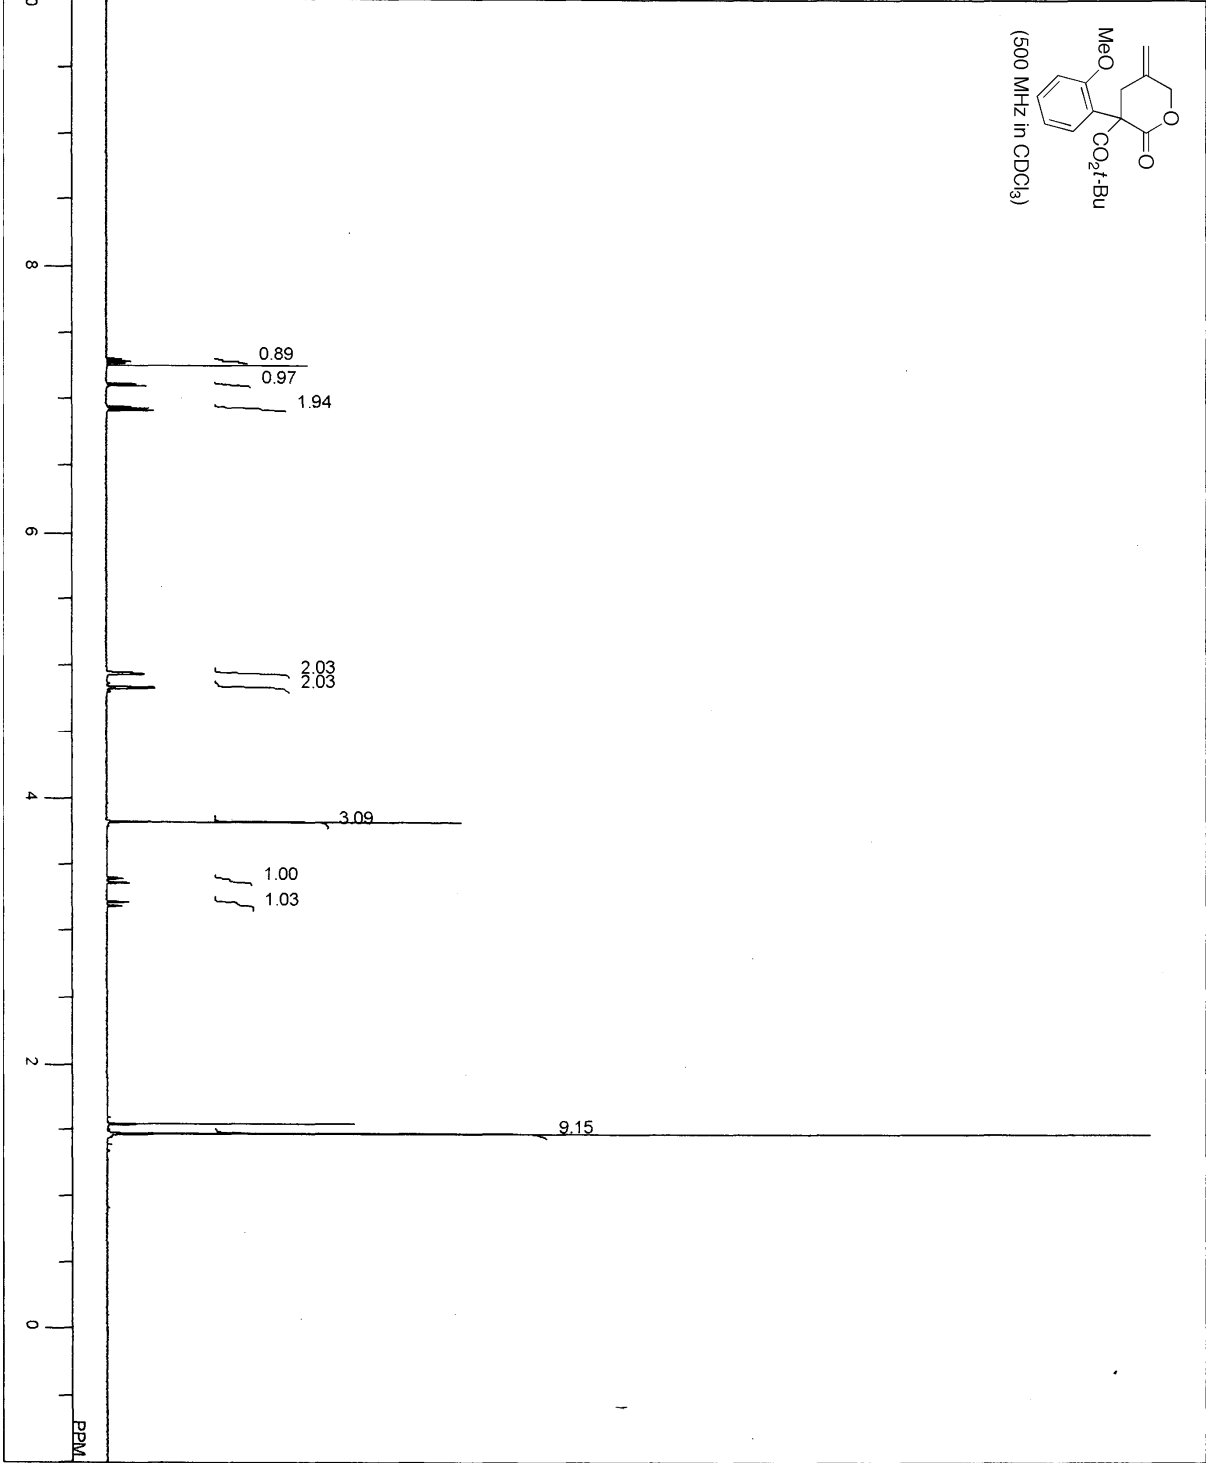

compound **1i**

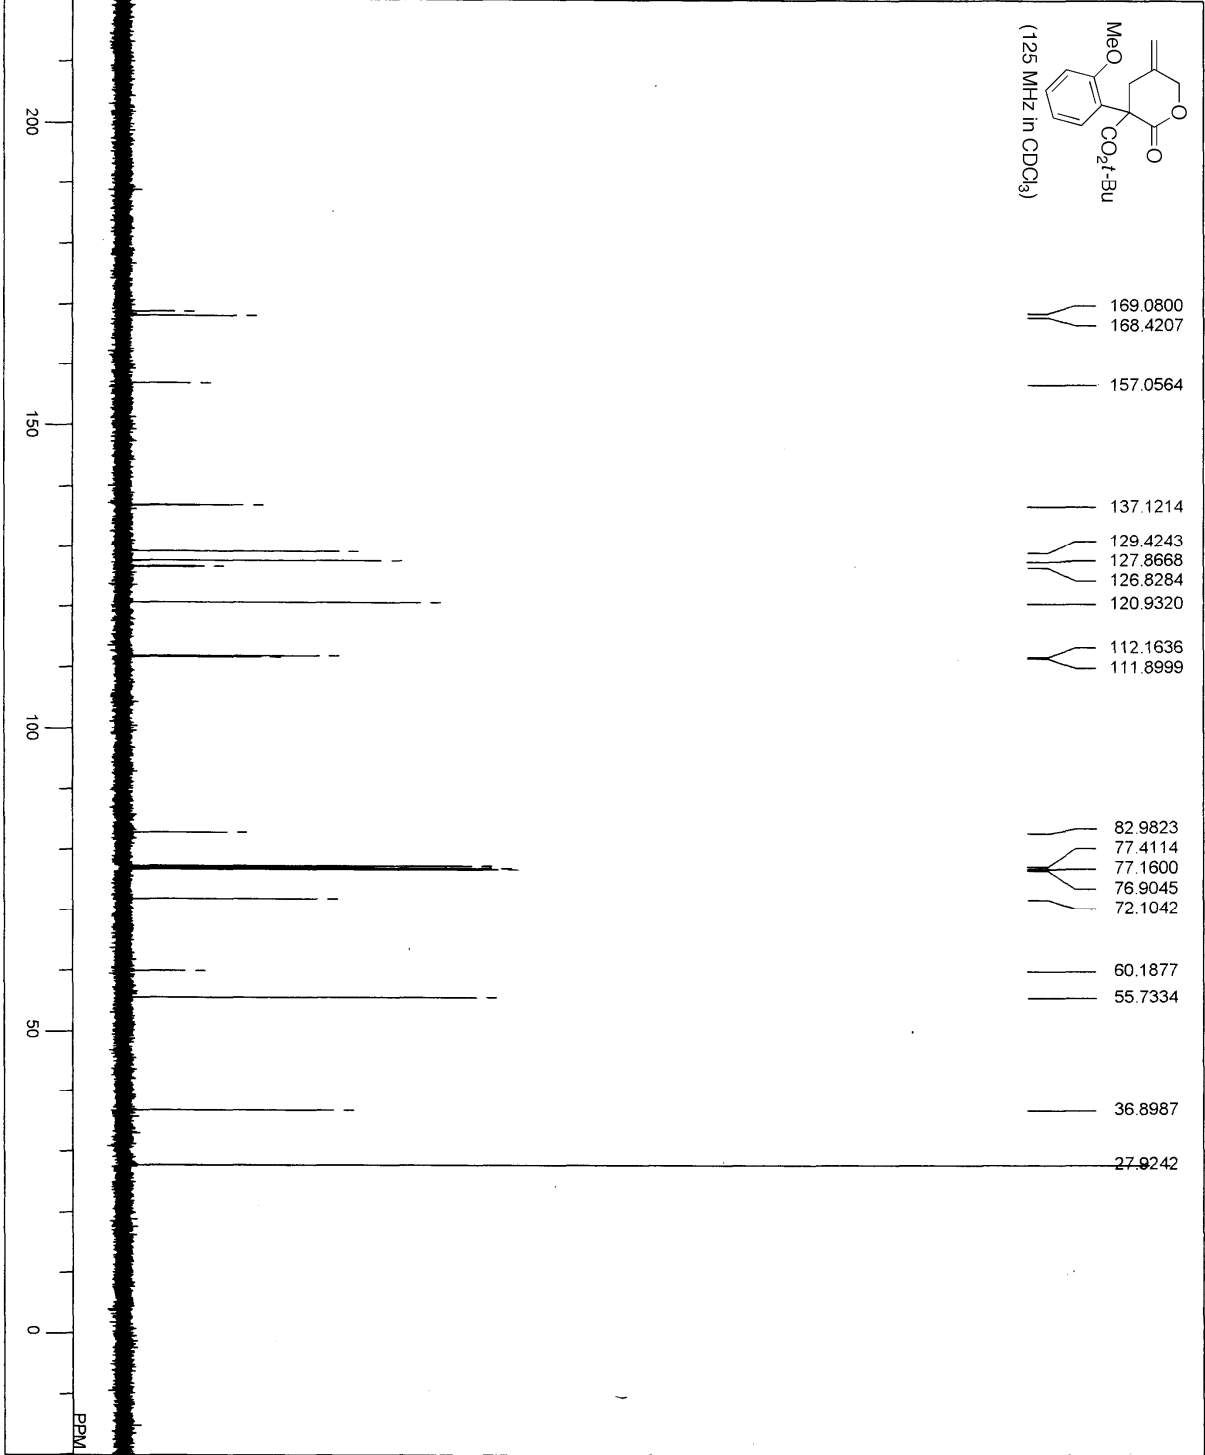

compound (S,S,S)-L4

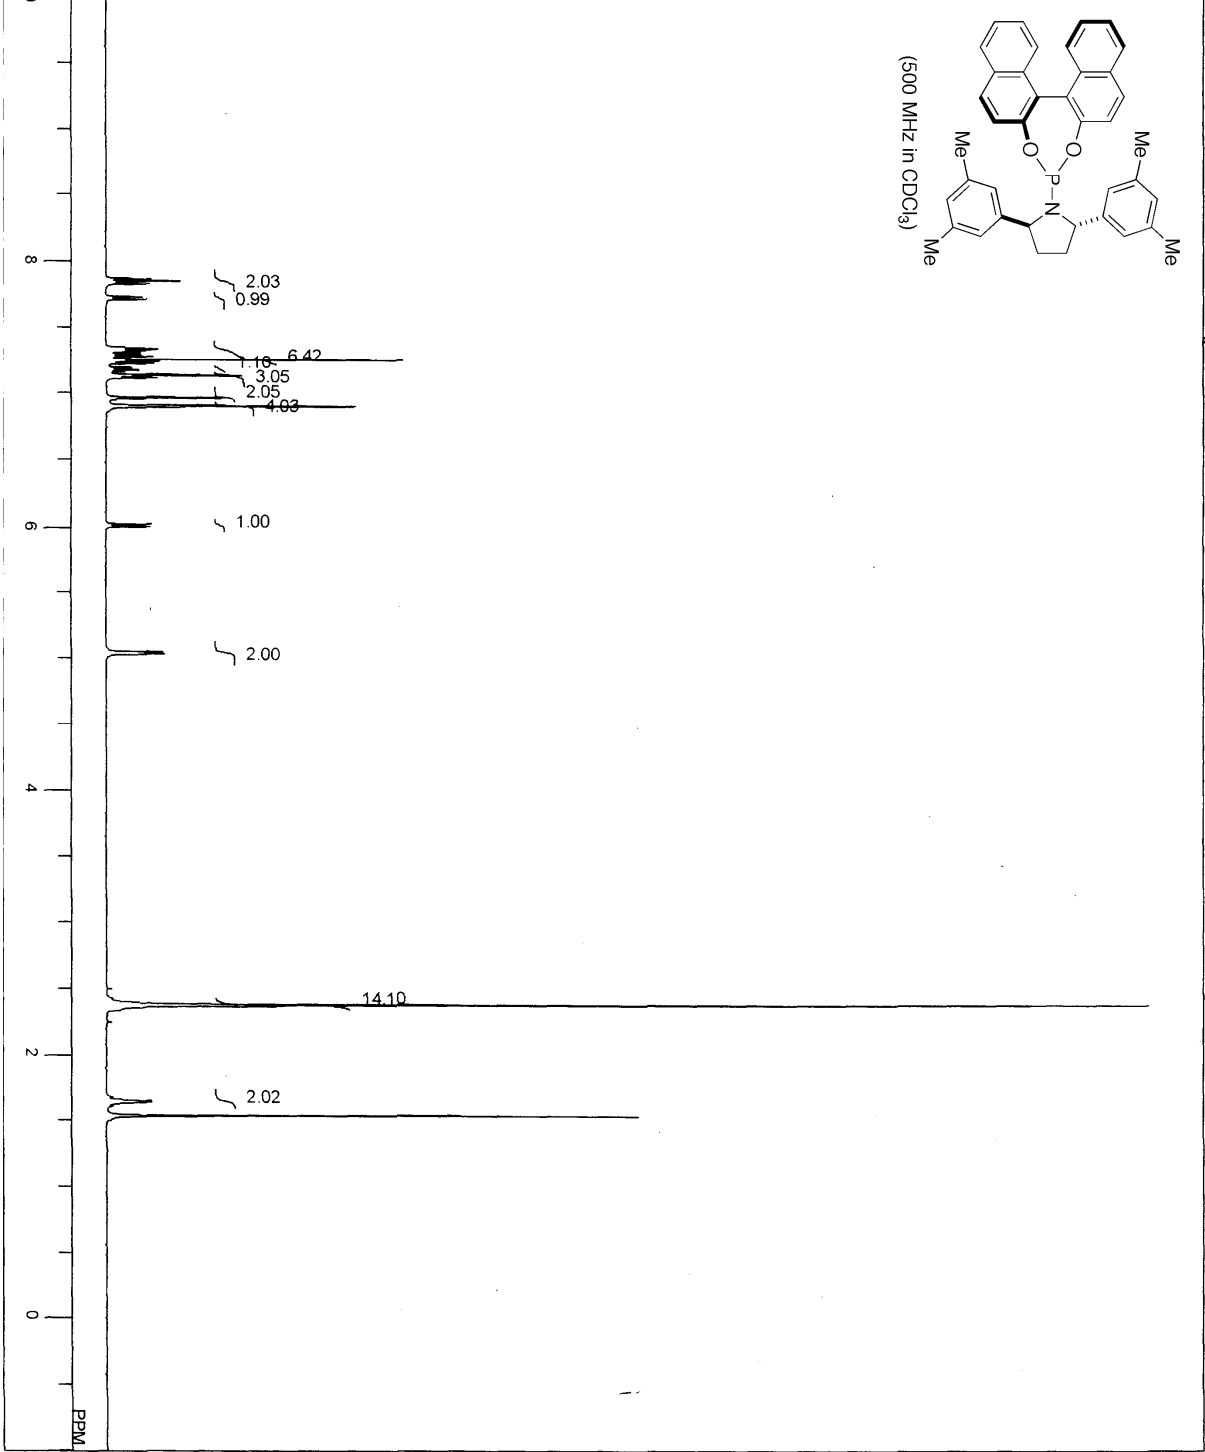

compound **3aa**(+**4aa**)

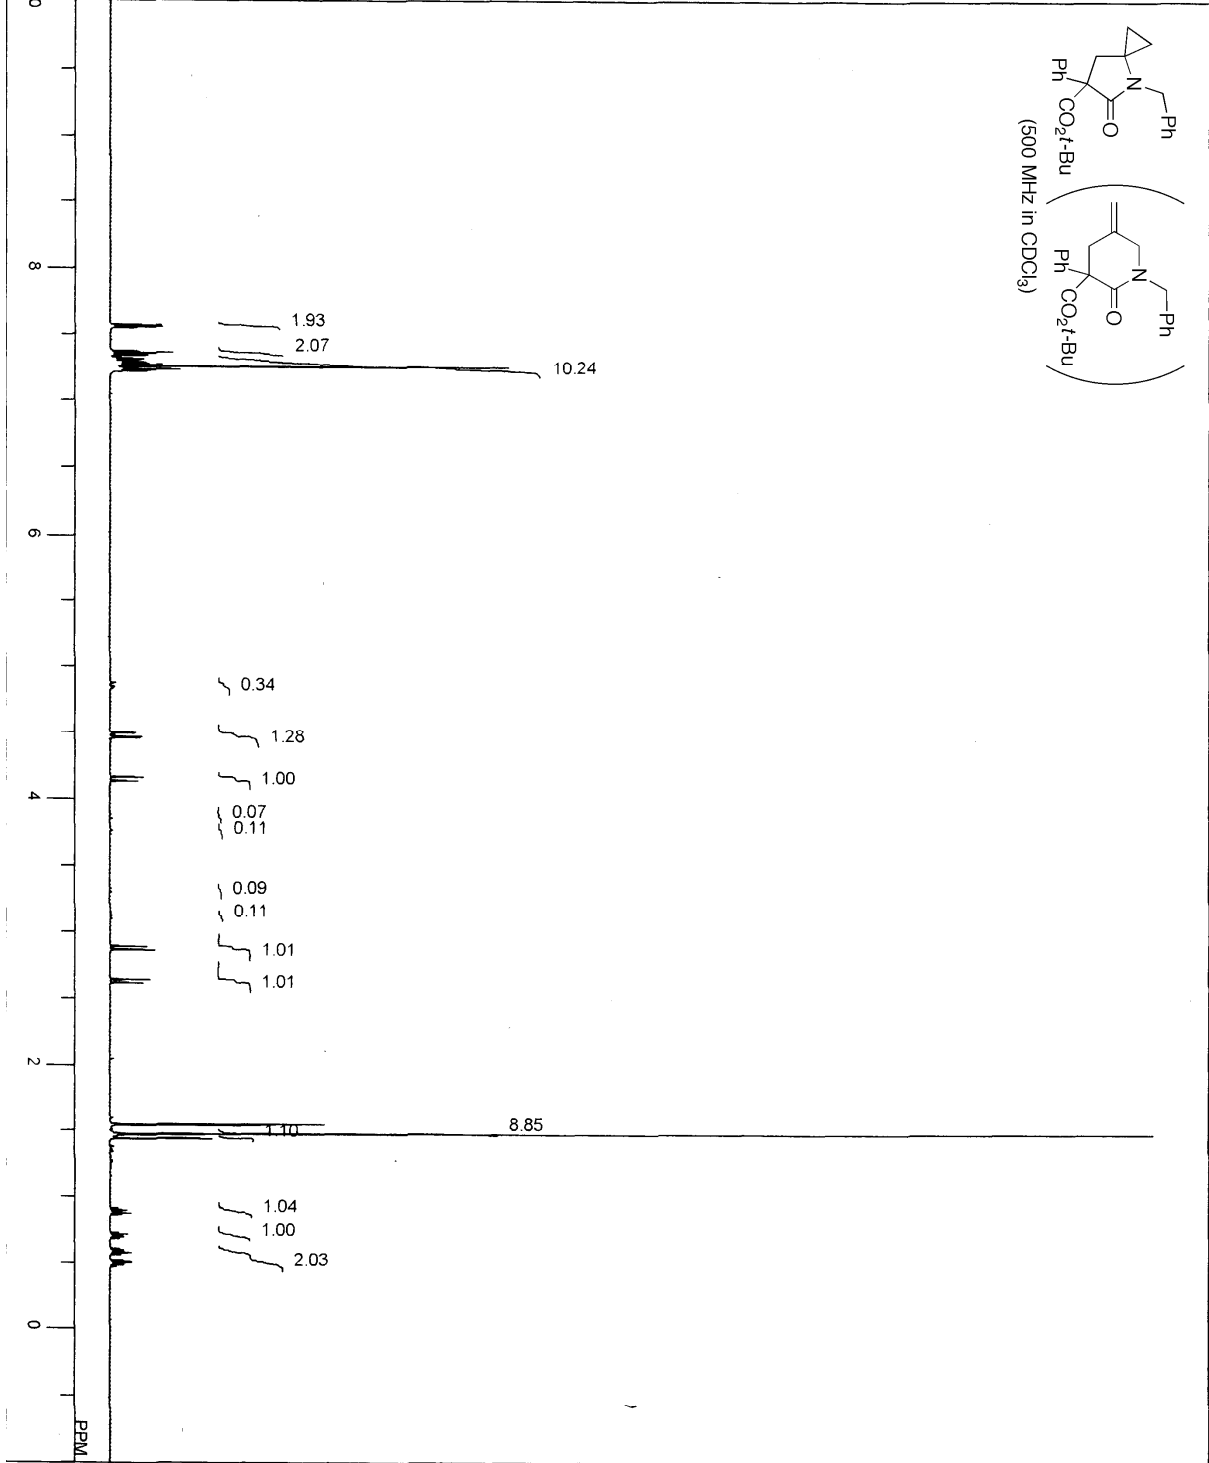

compound **3aa**(+**4aa**)

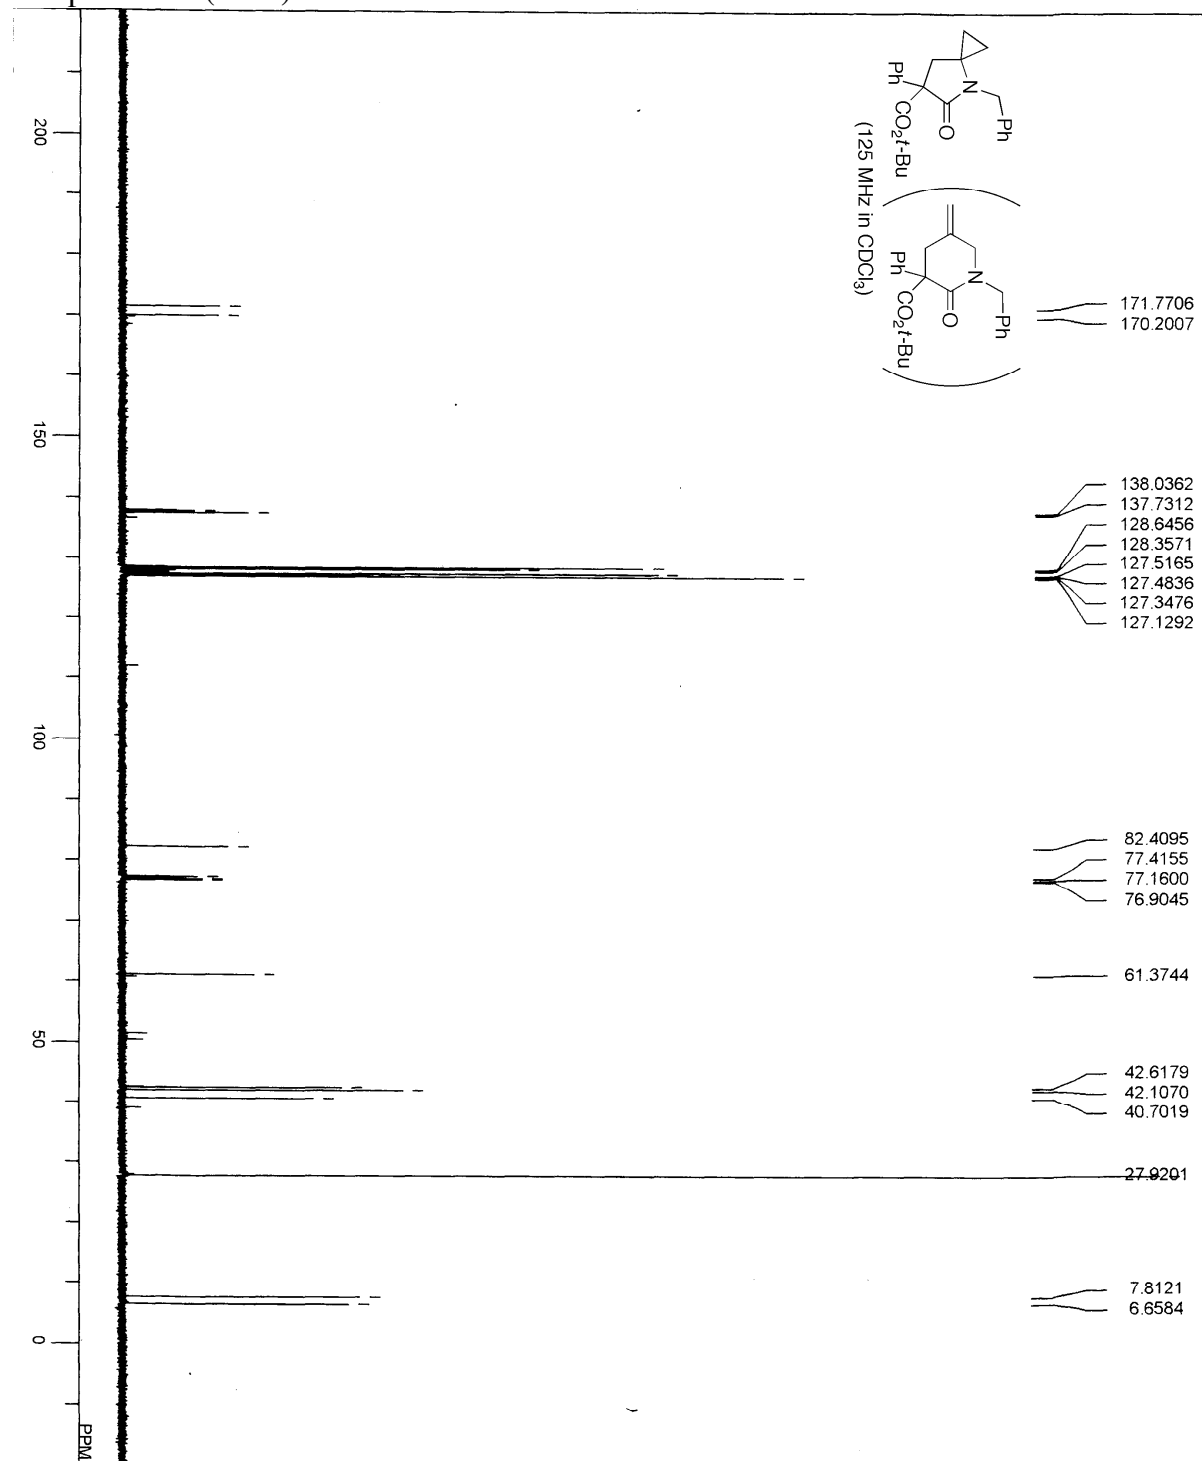



compound **3ba**(+4**ba**)

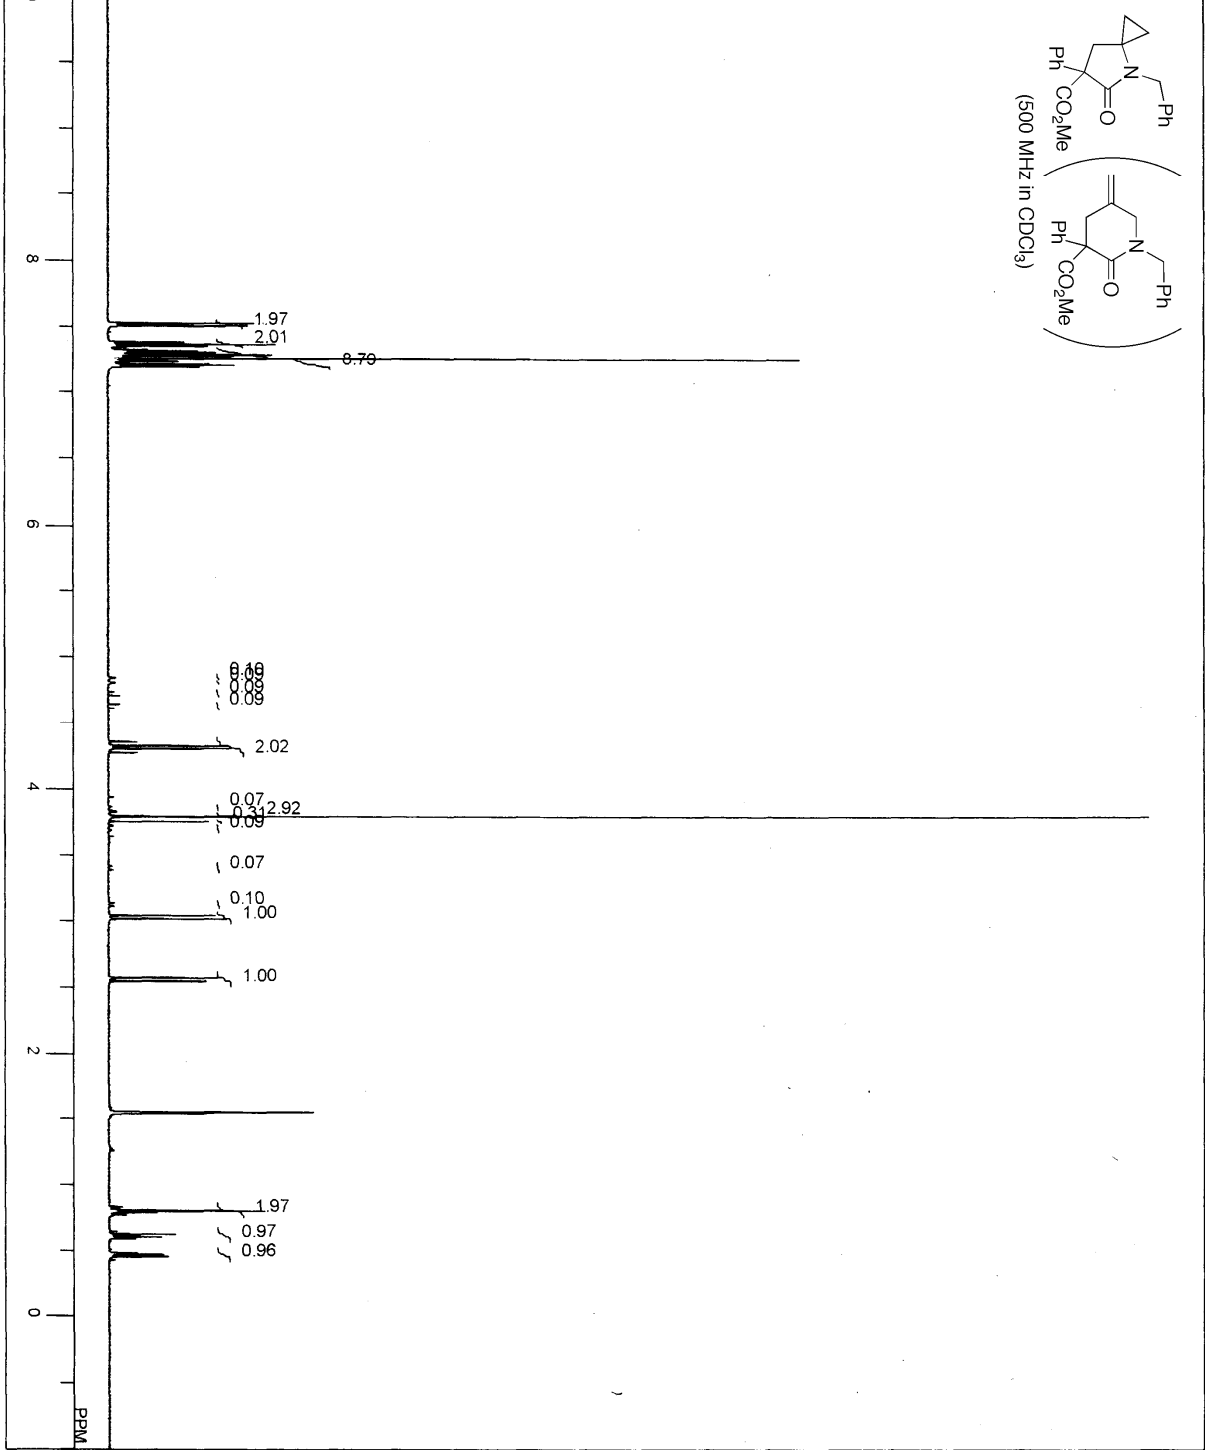

compound **3ba**(+**4ba**)

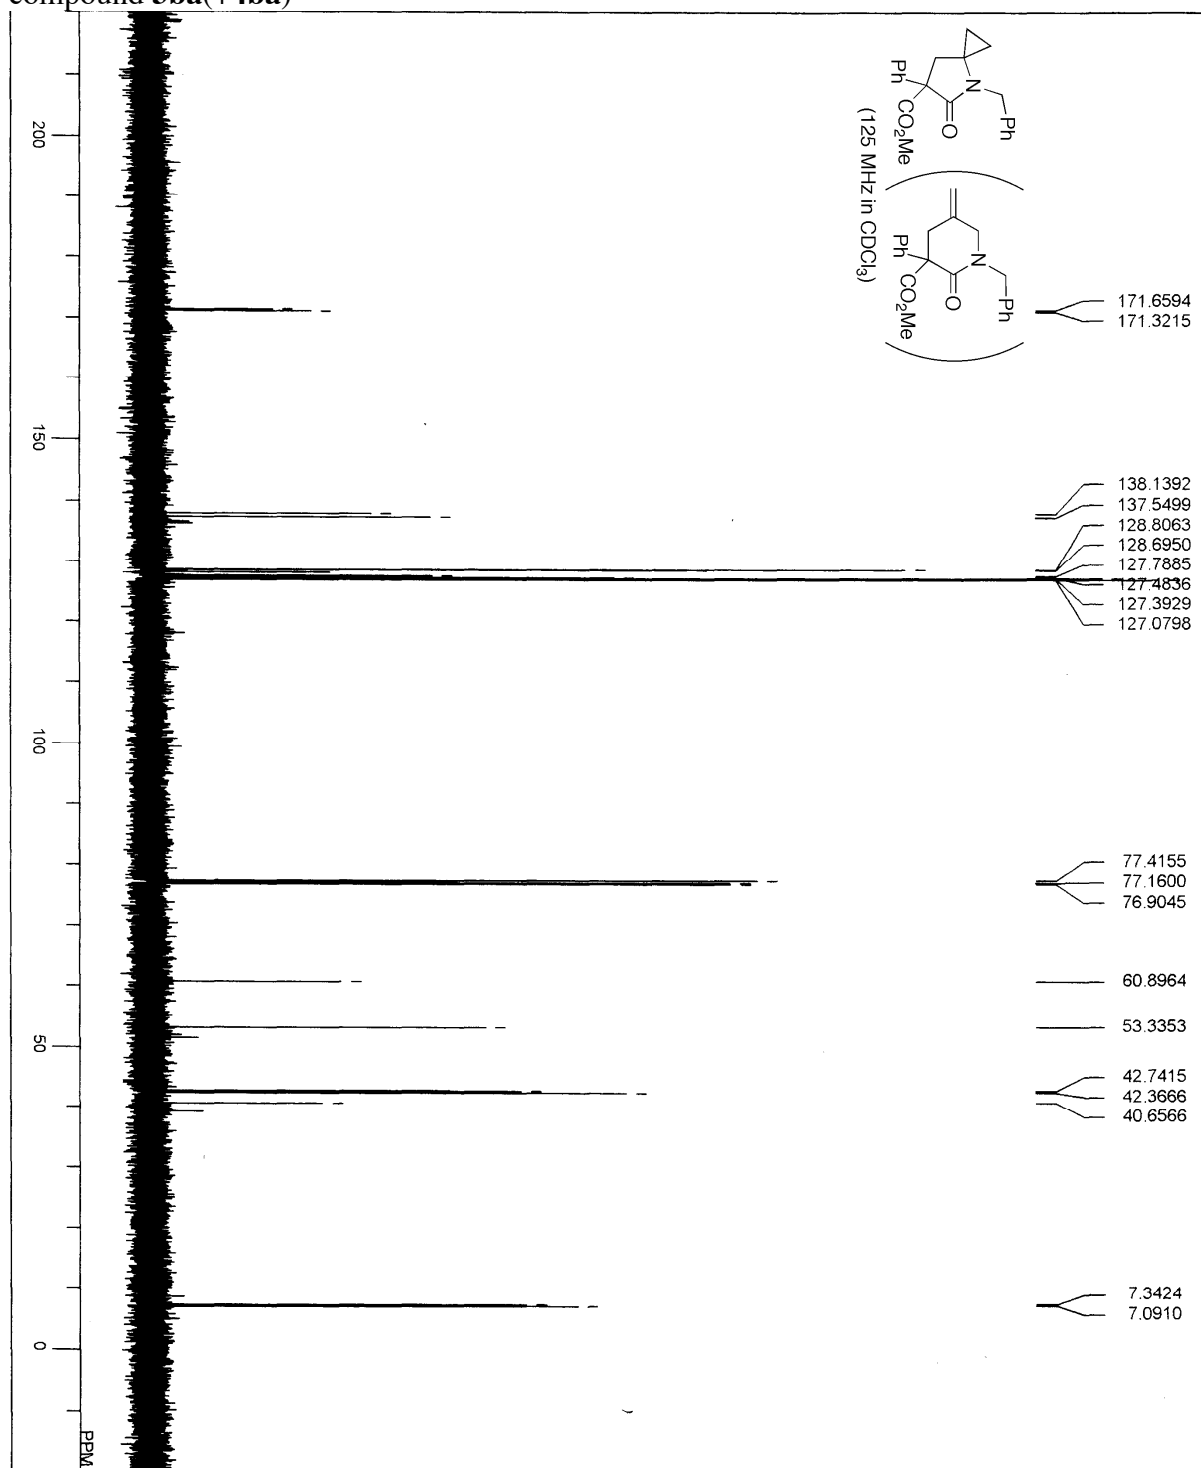

compound **3ab(+4ab)**

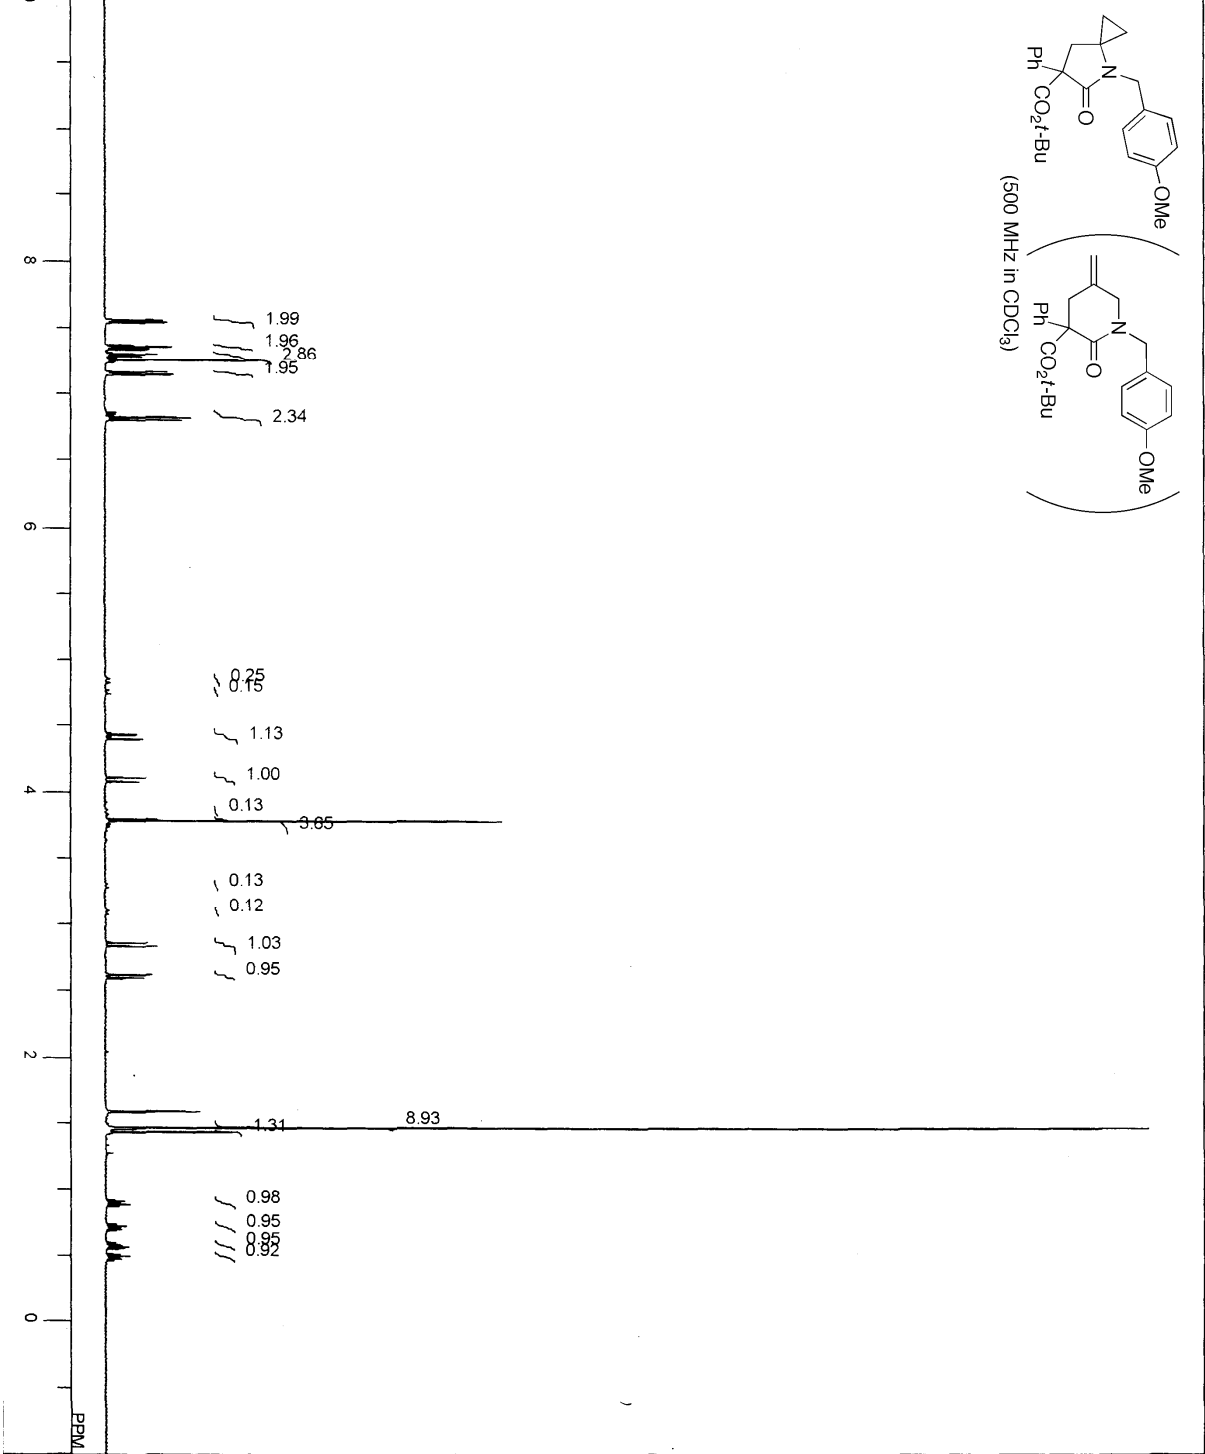

compound **3ab(+4ab)**

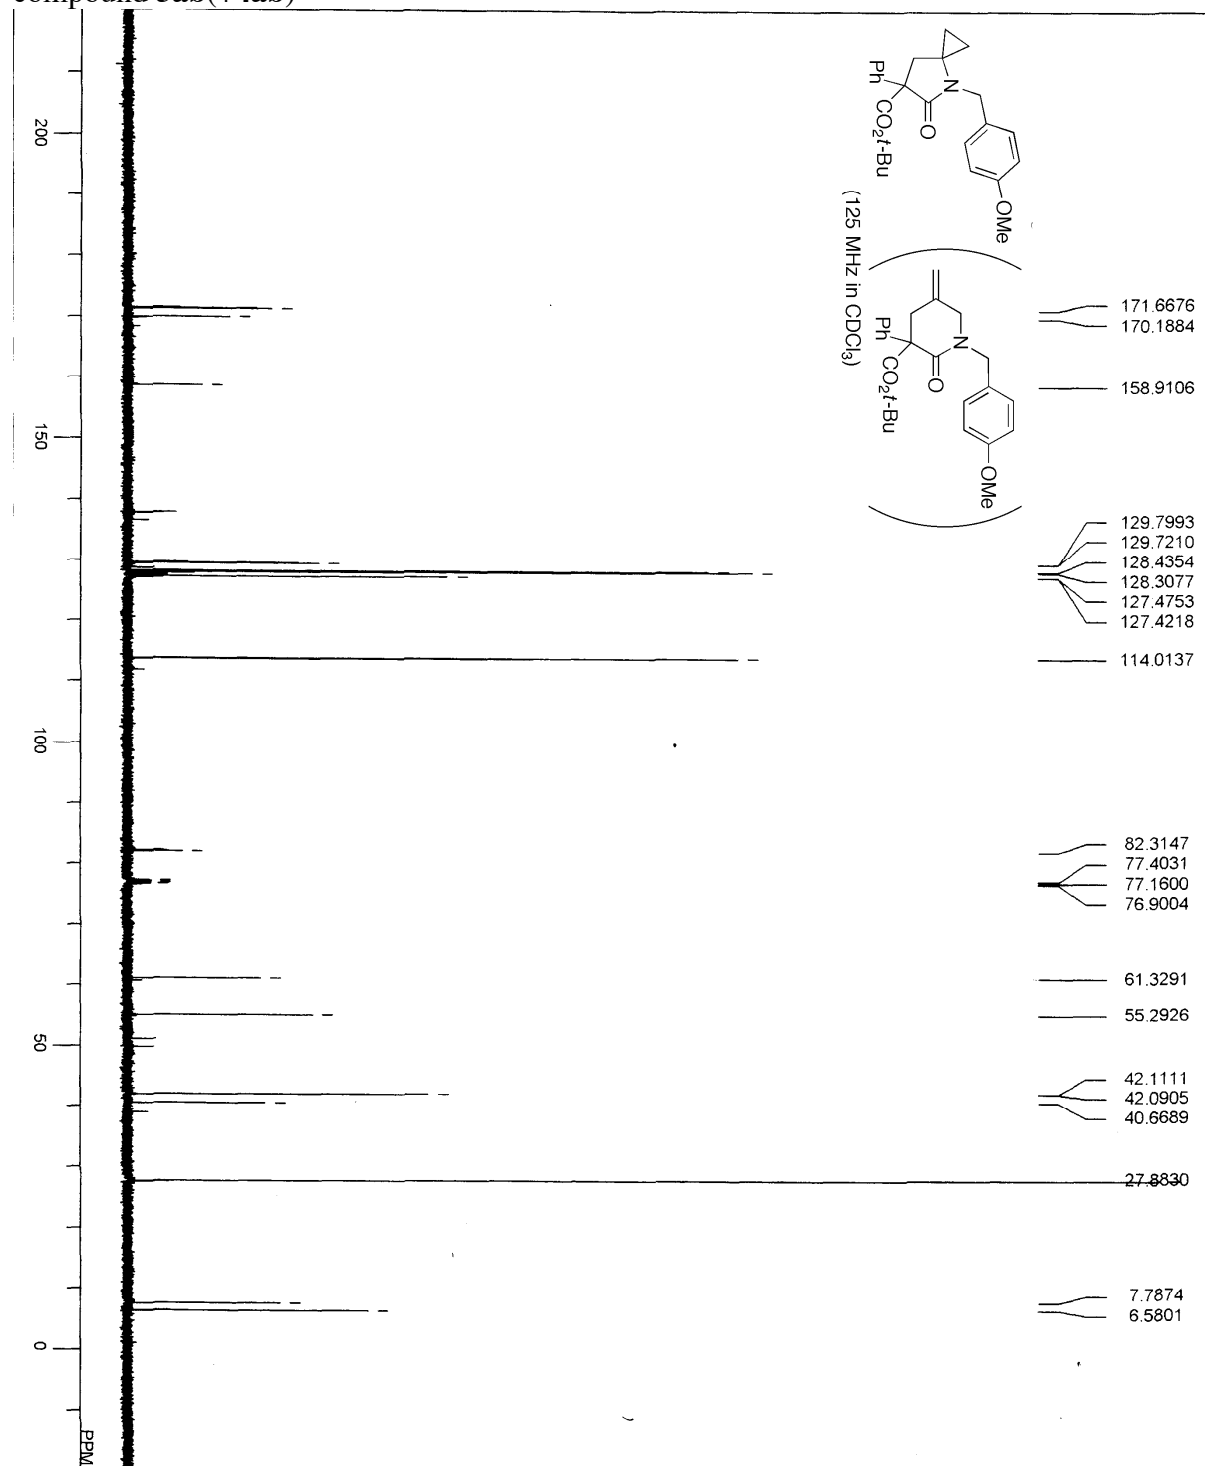

compound **3ac**(+4ac)

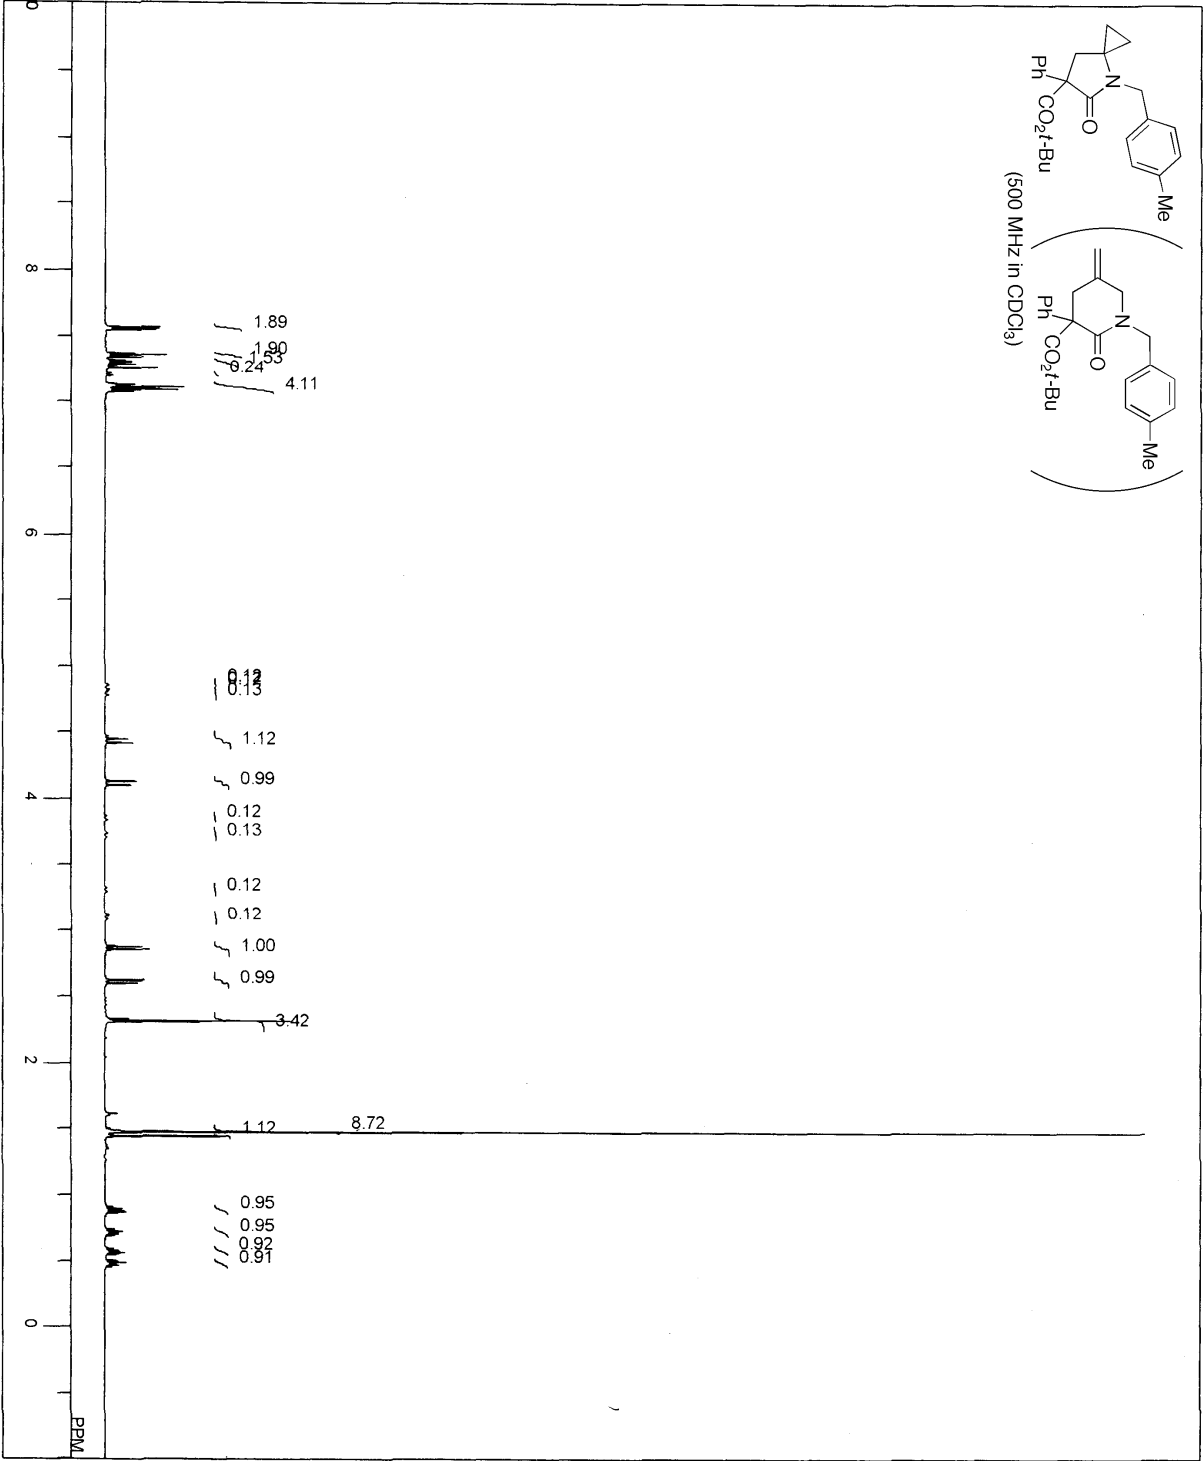

compound **3ac(+4ac)**

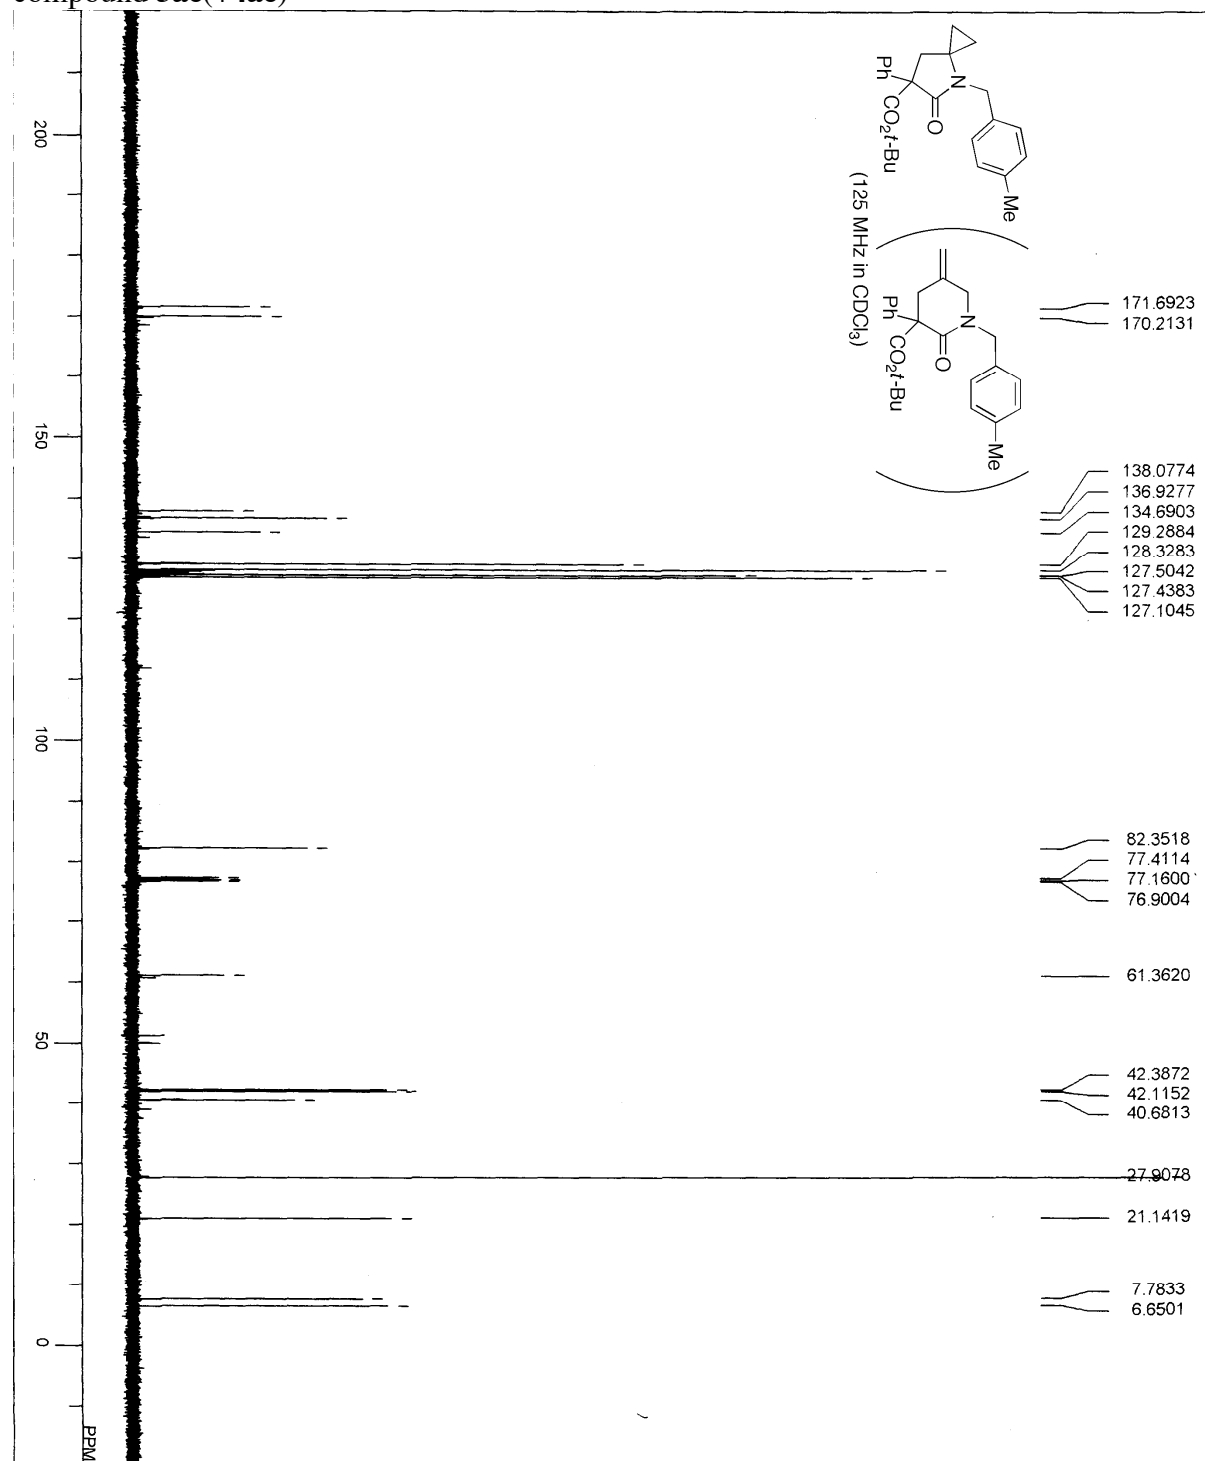

compound **3ad**(+**4ad**)

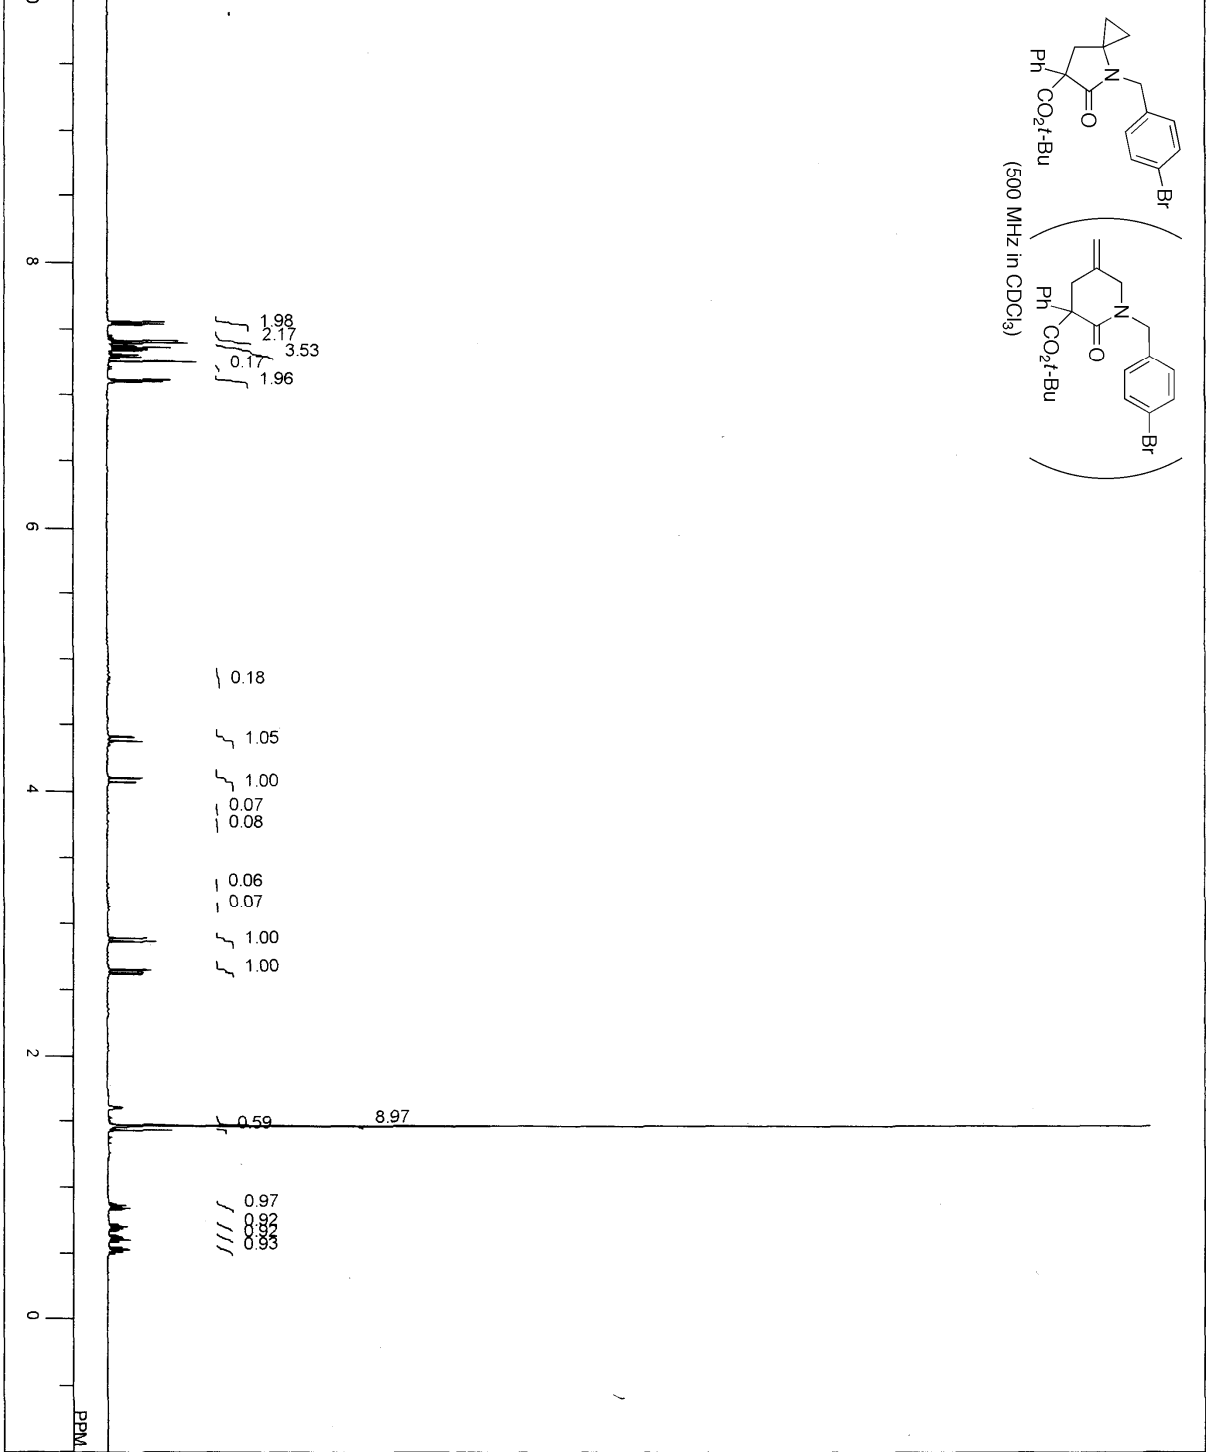

compound **3ad**(+**4ad**)

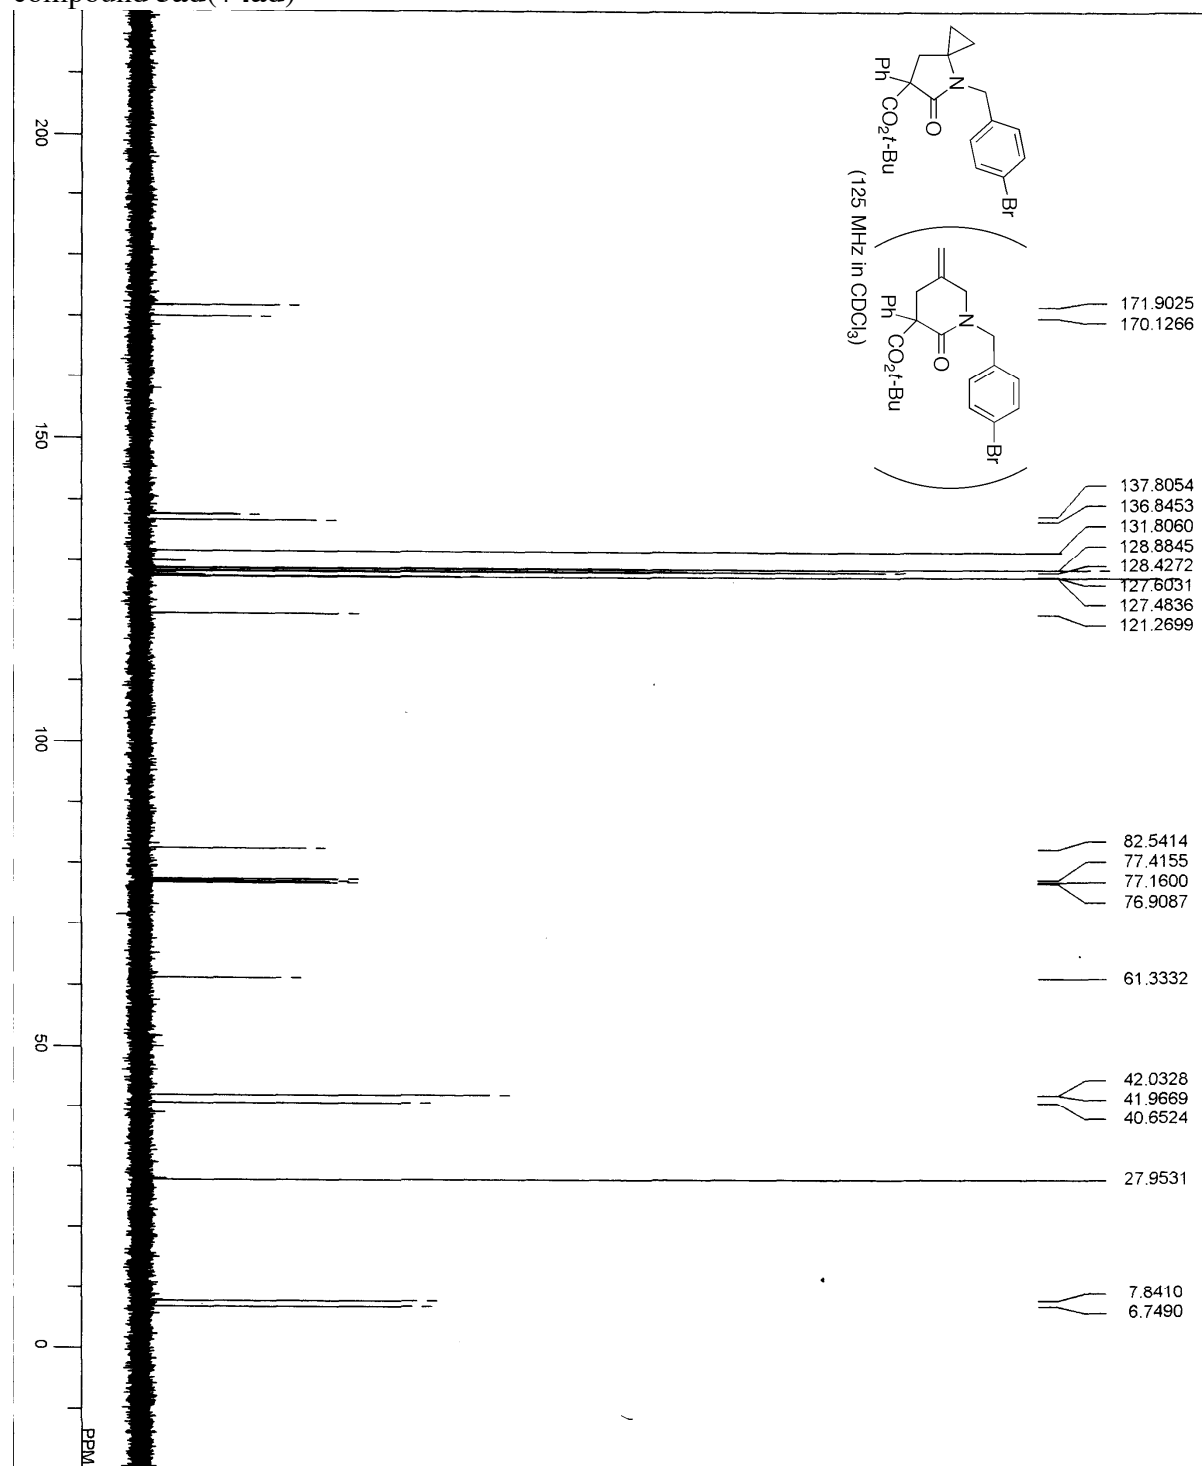



compound **3ae**(+4ae)

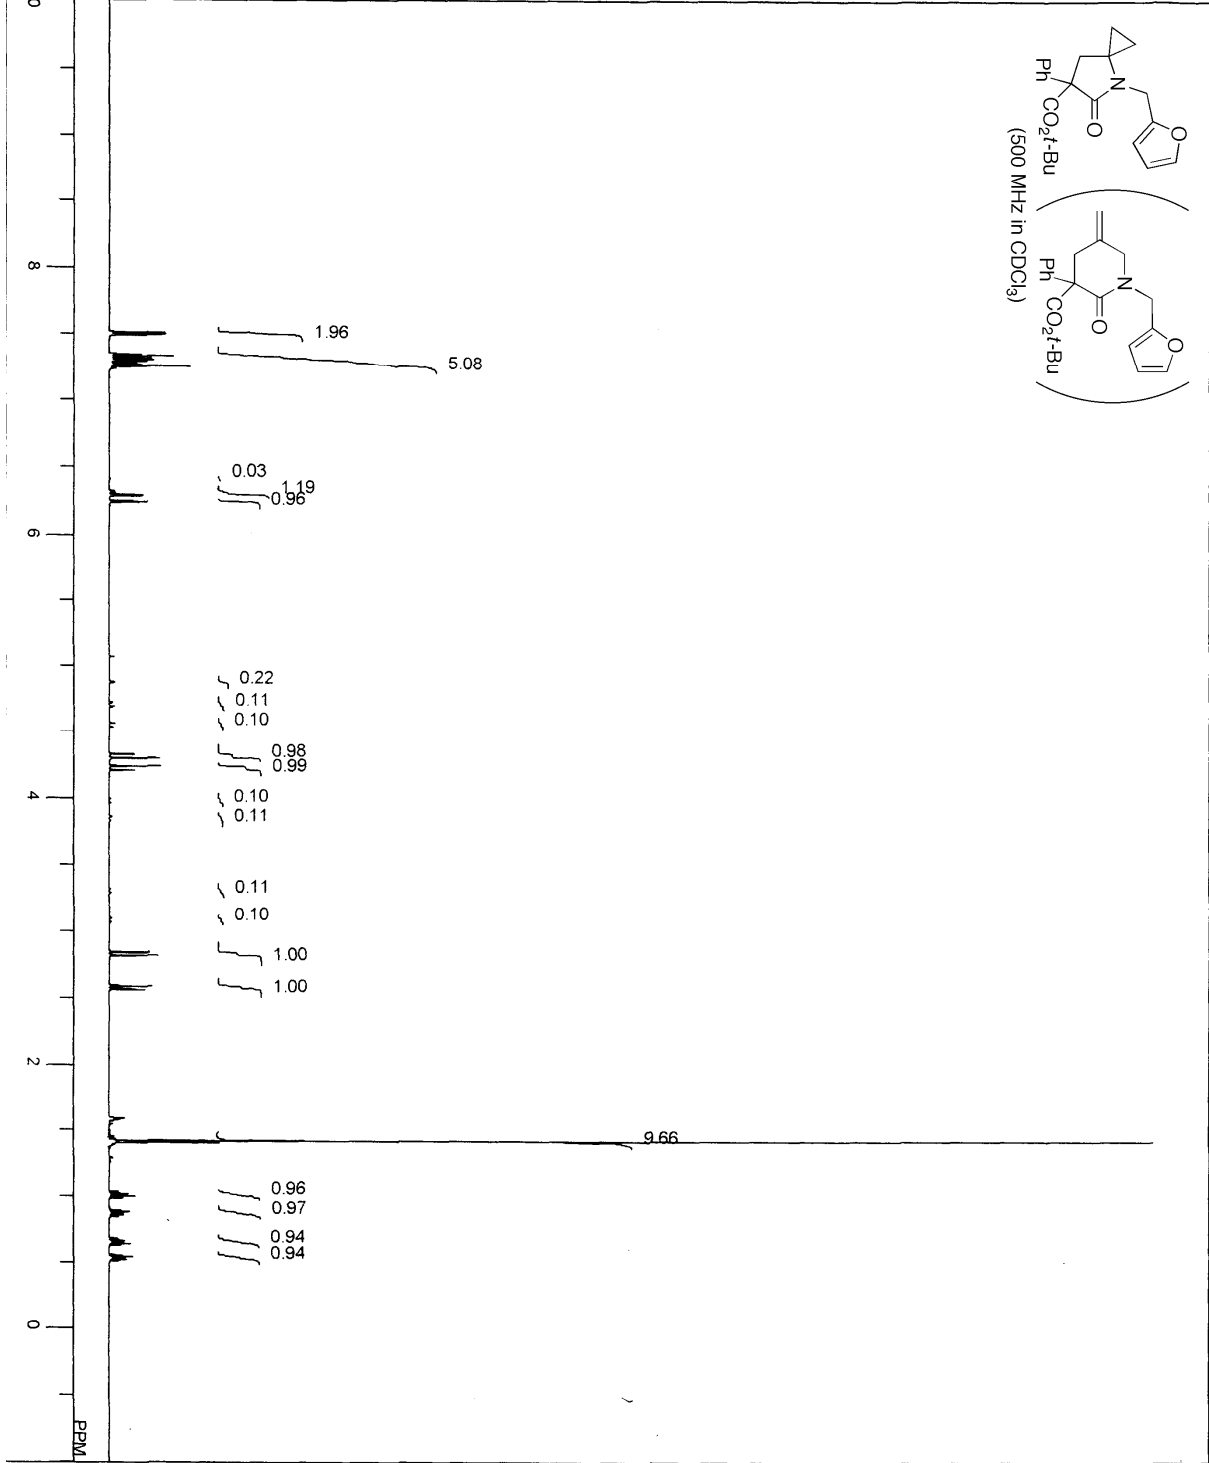

compound **3ae**(+**4ae**)

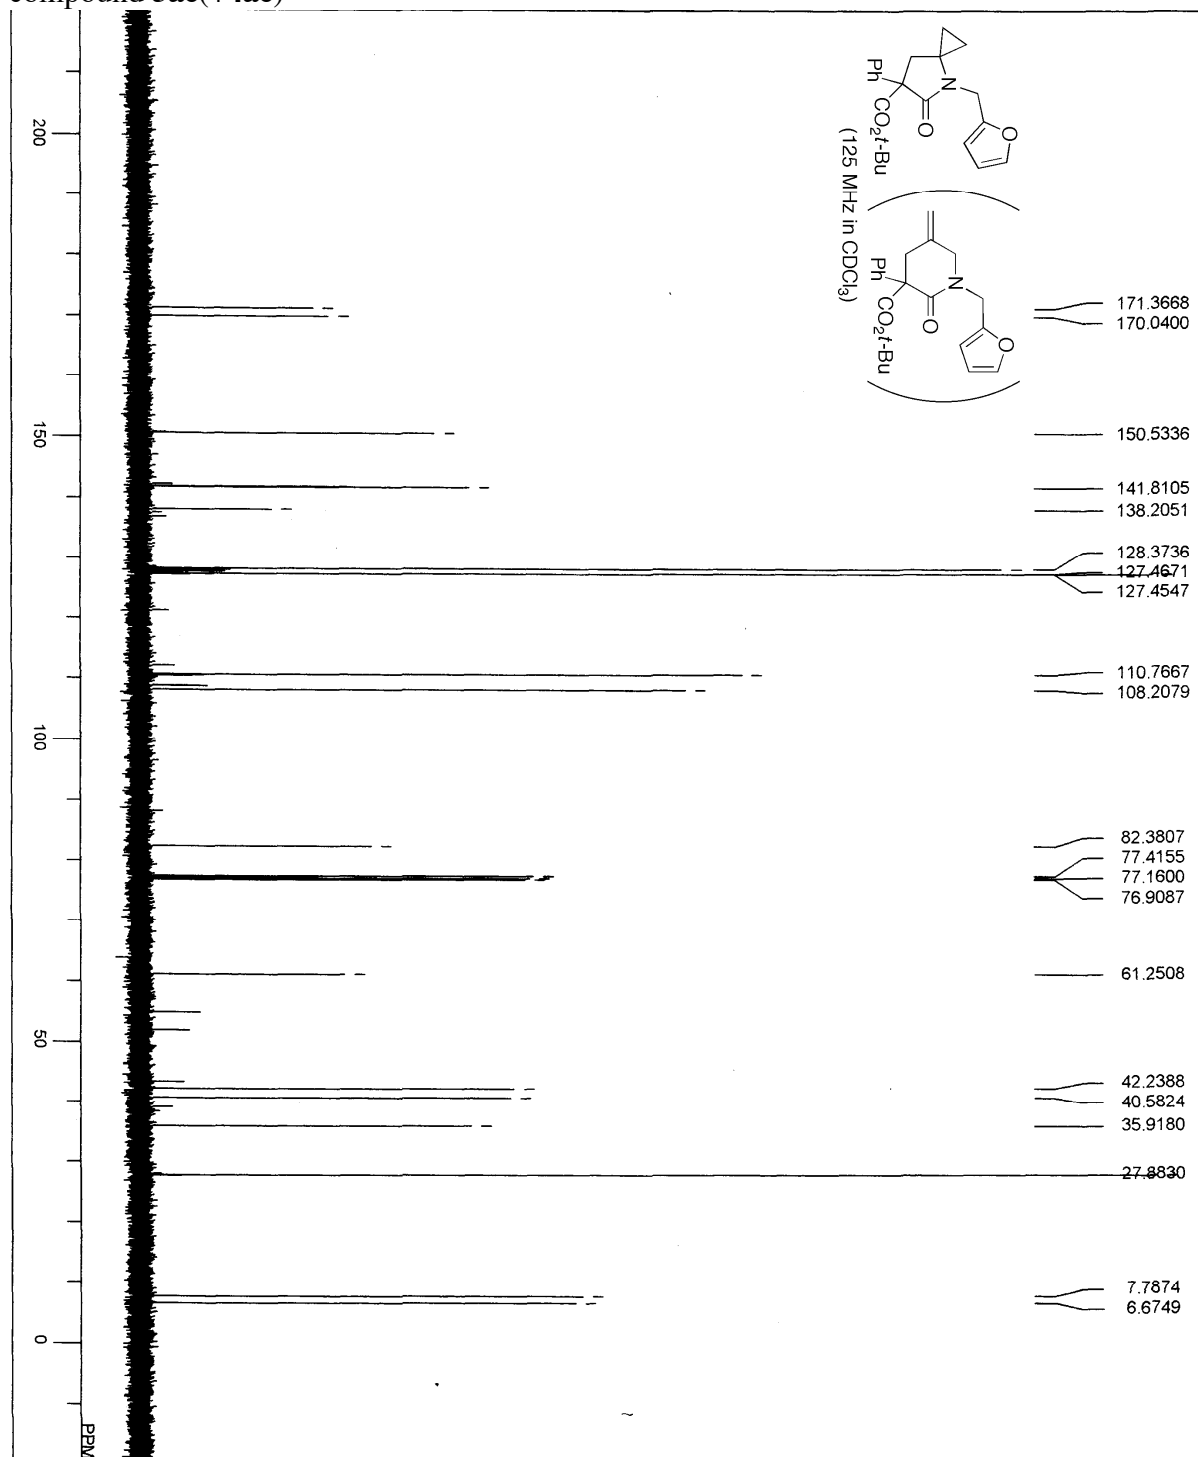

compound **3af**(+**4af**)

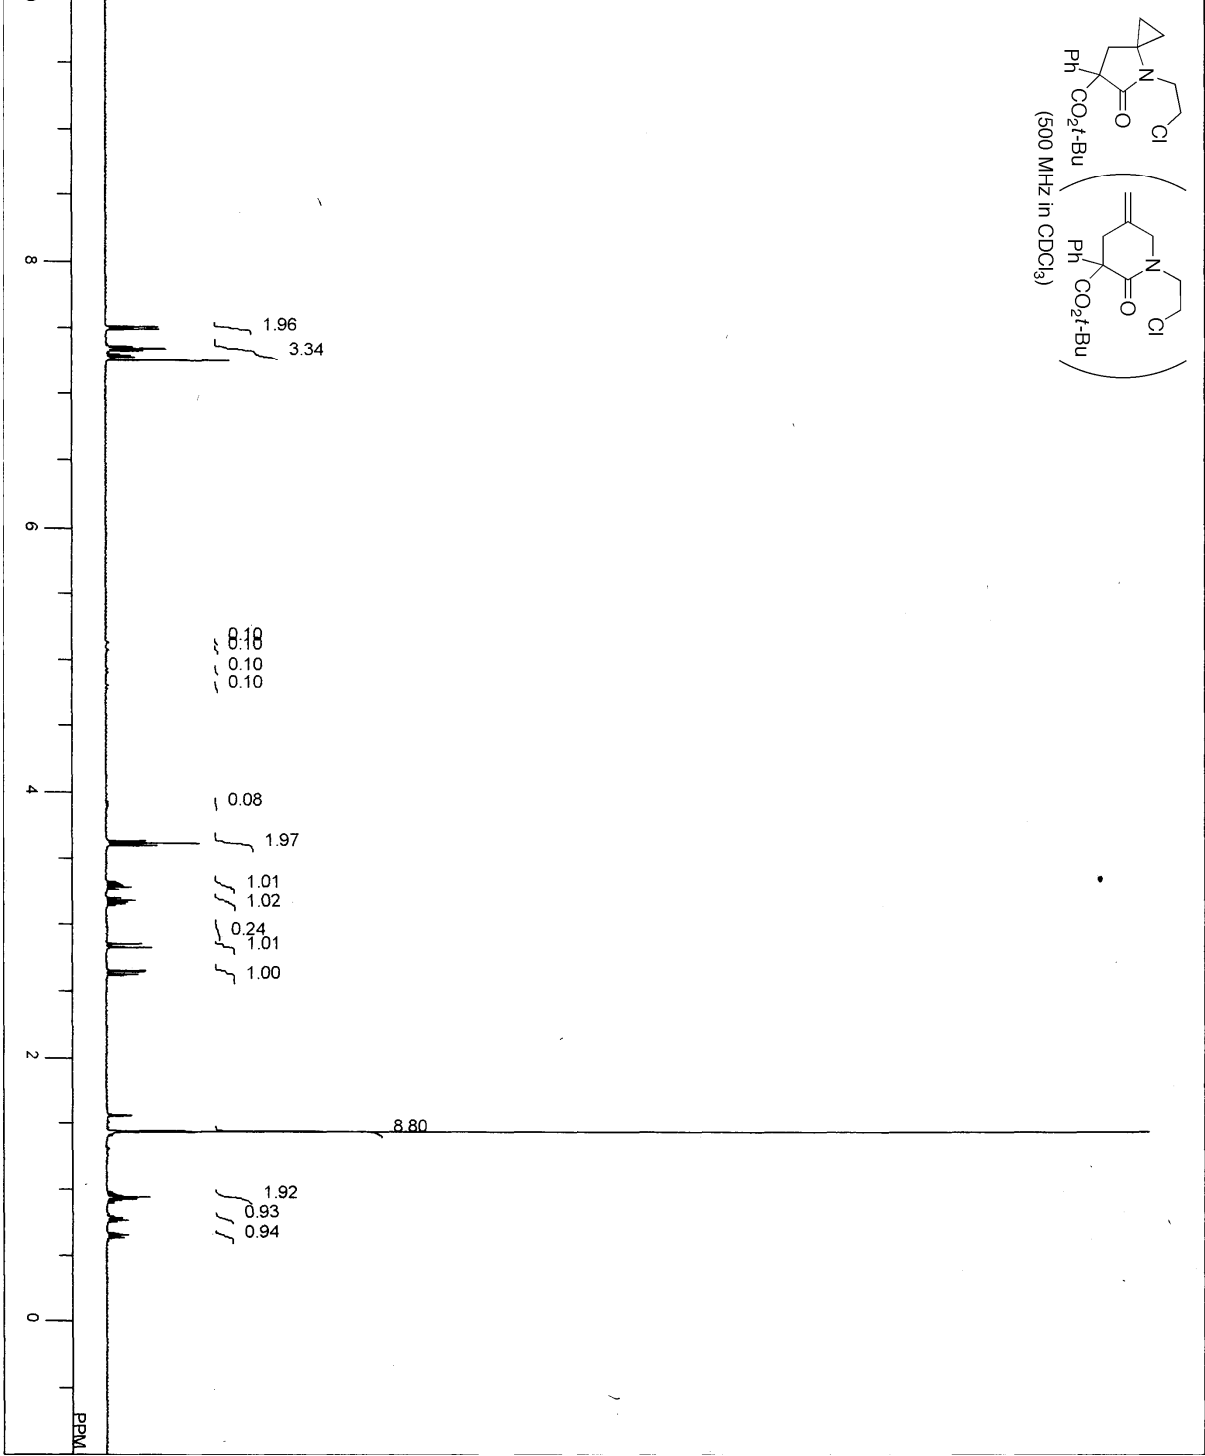

compound **3af**(+**4af**)

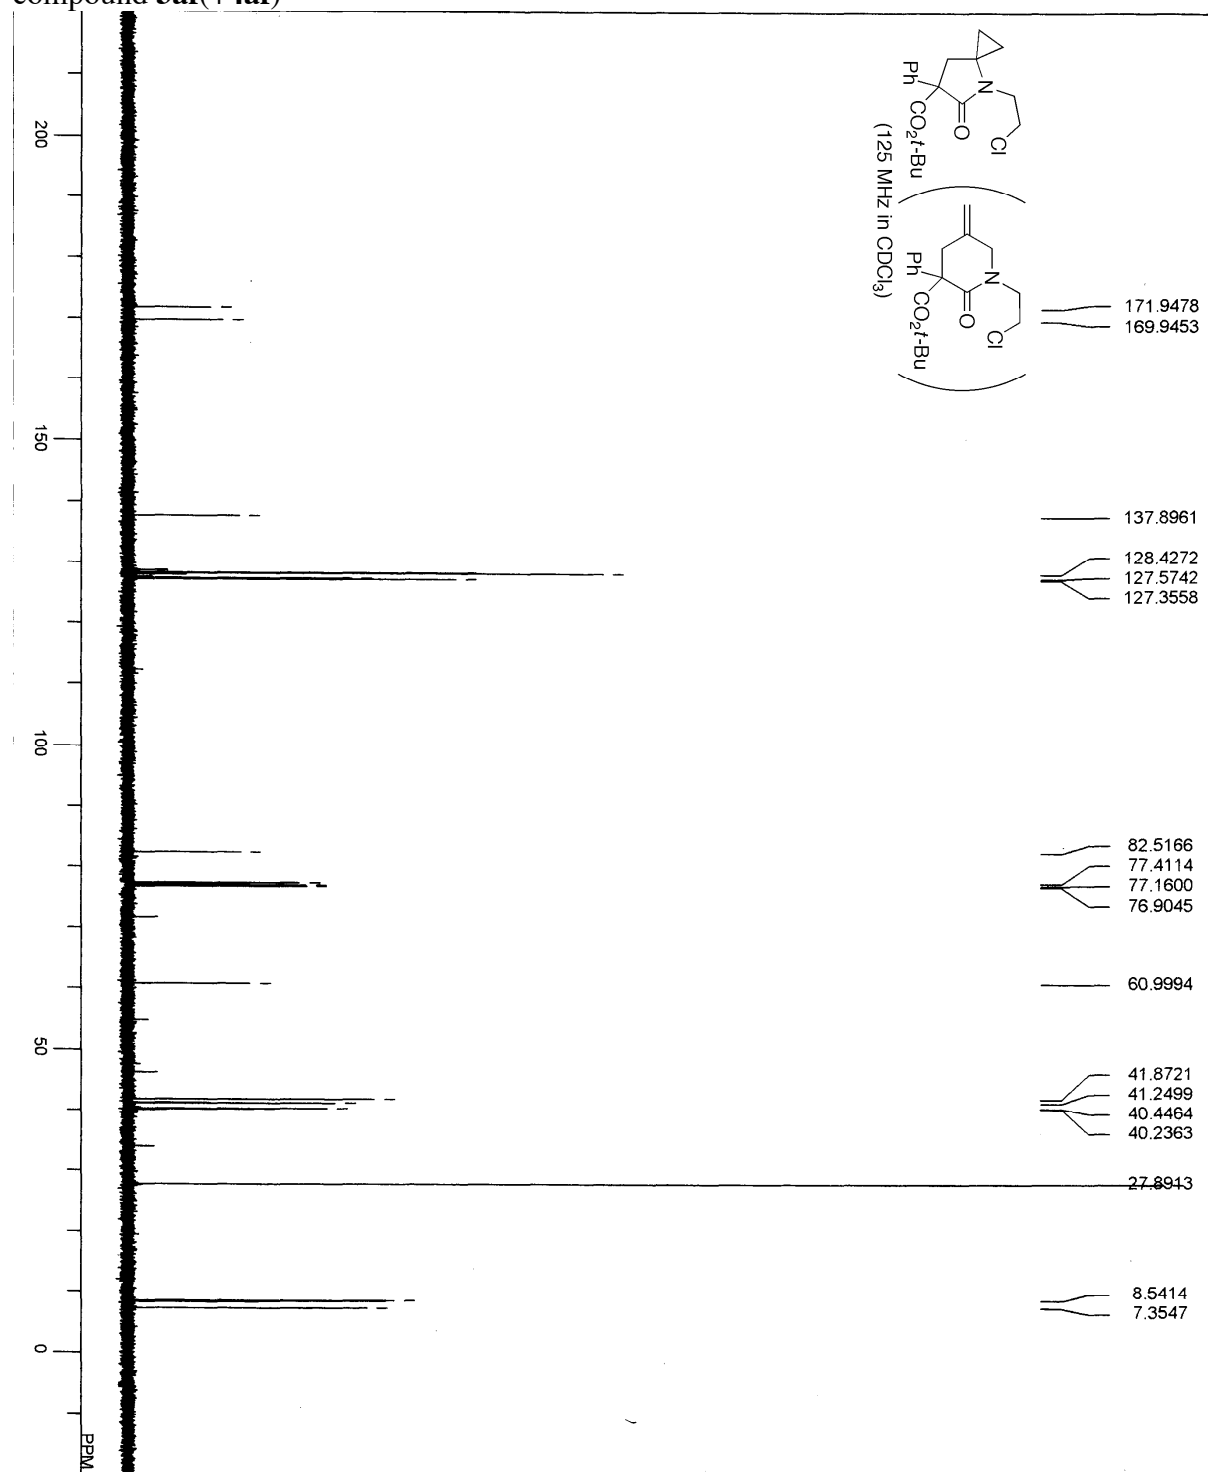

compound **3ag**

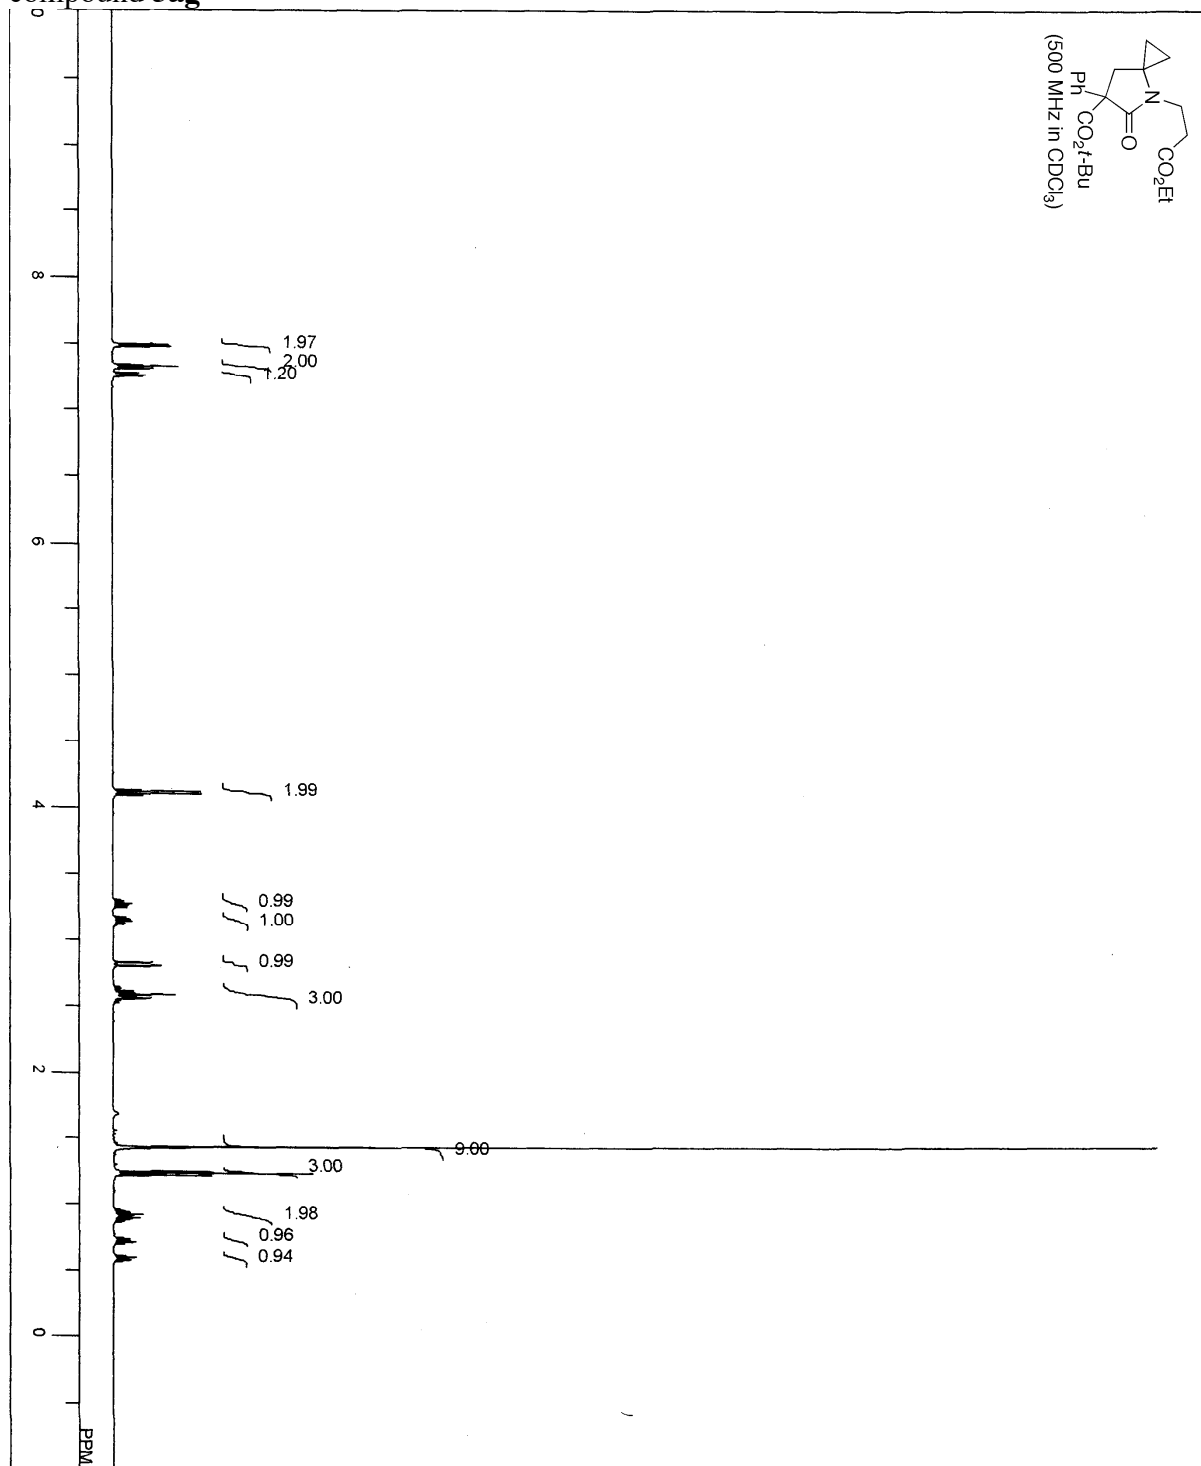

compound **3ag**

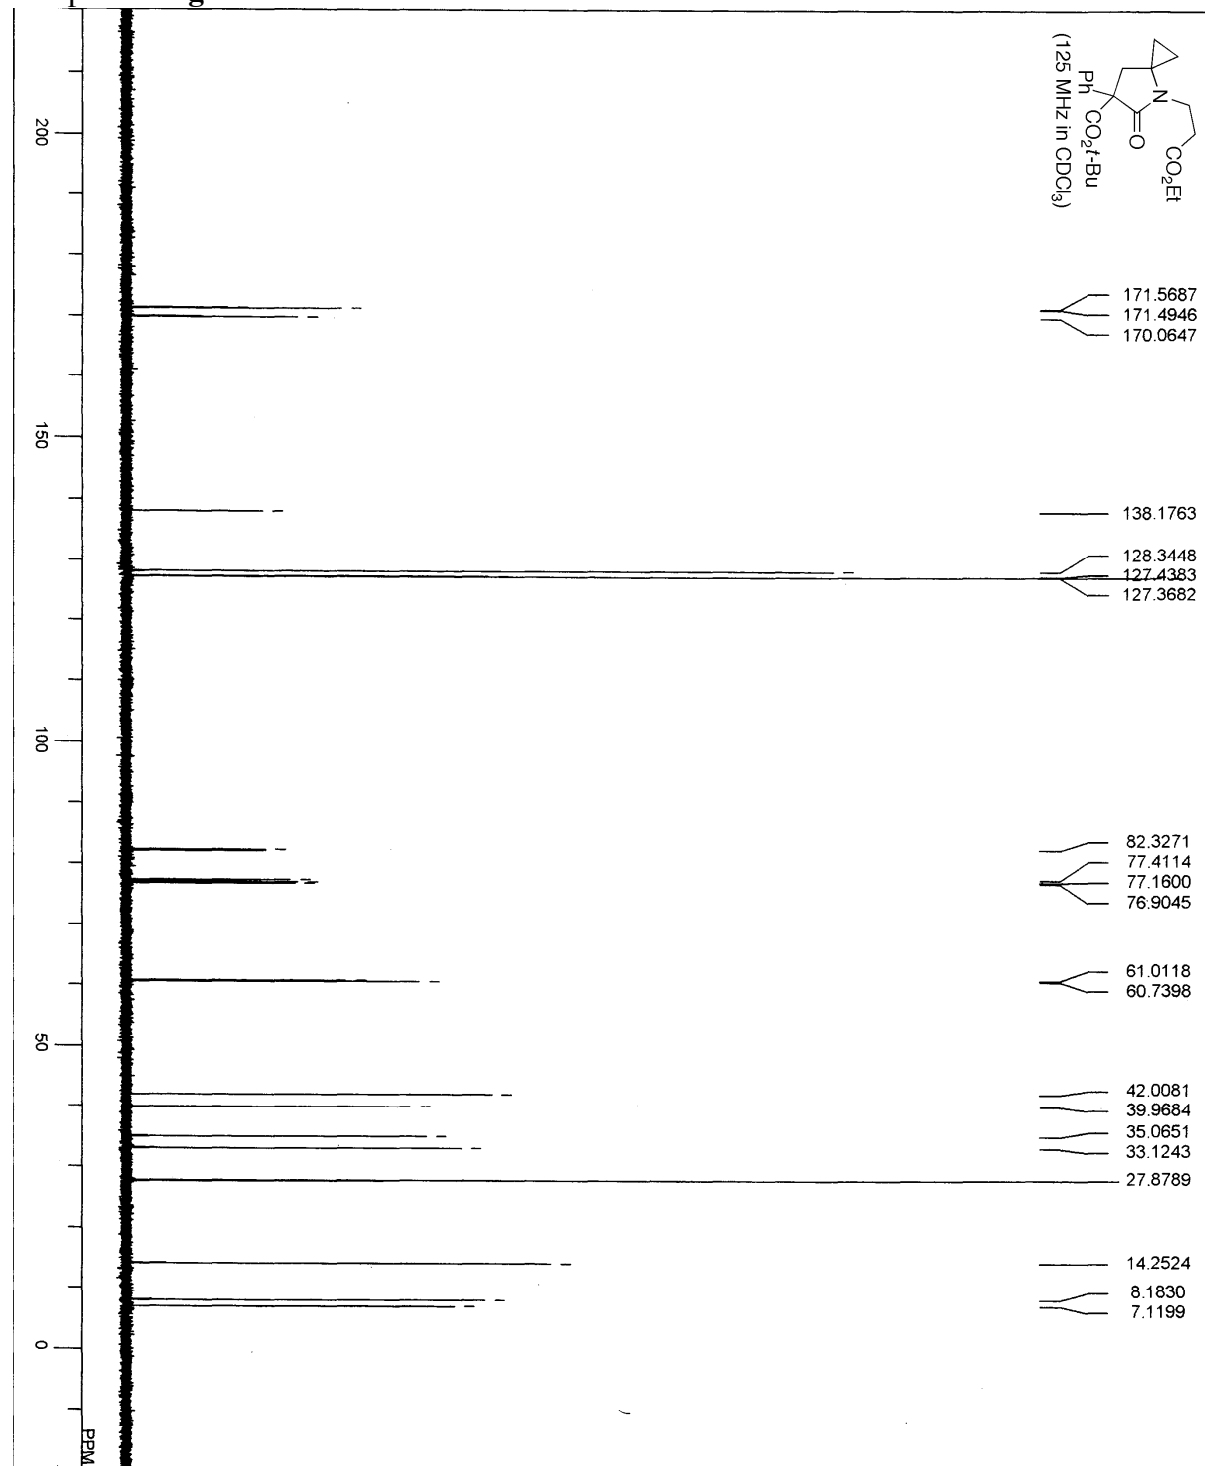

compound **3ca**(+4ca)

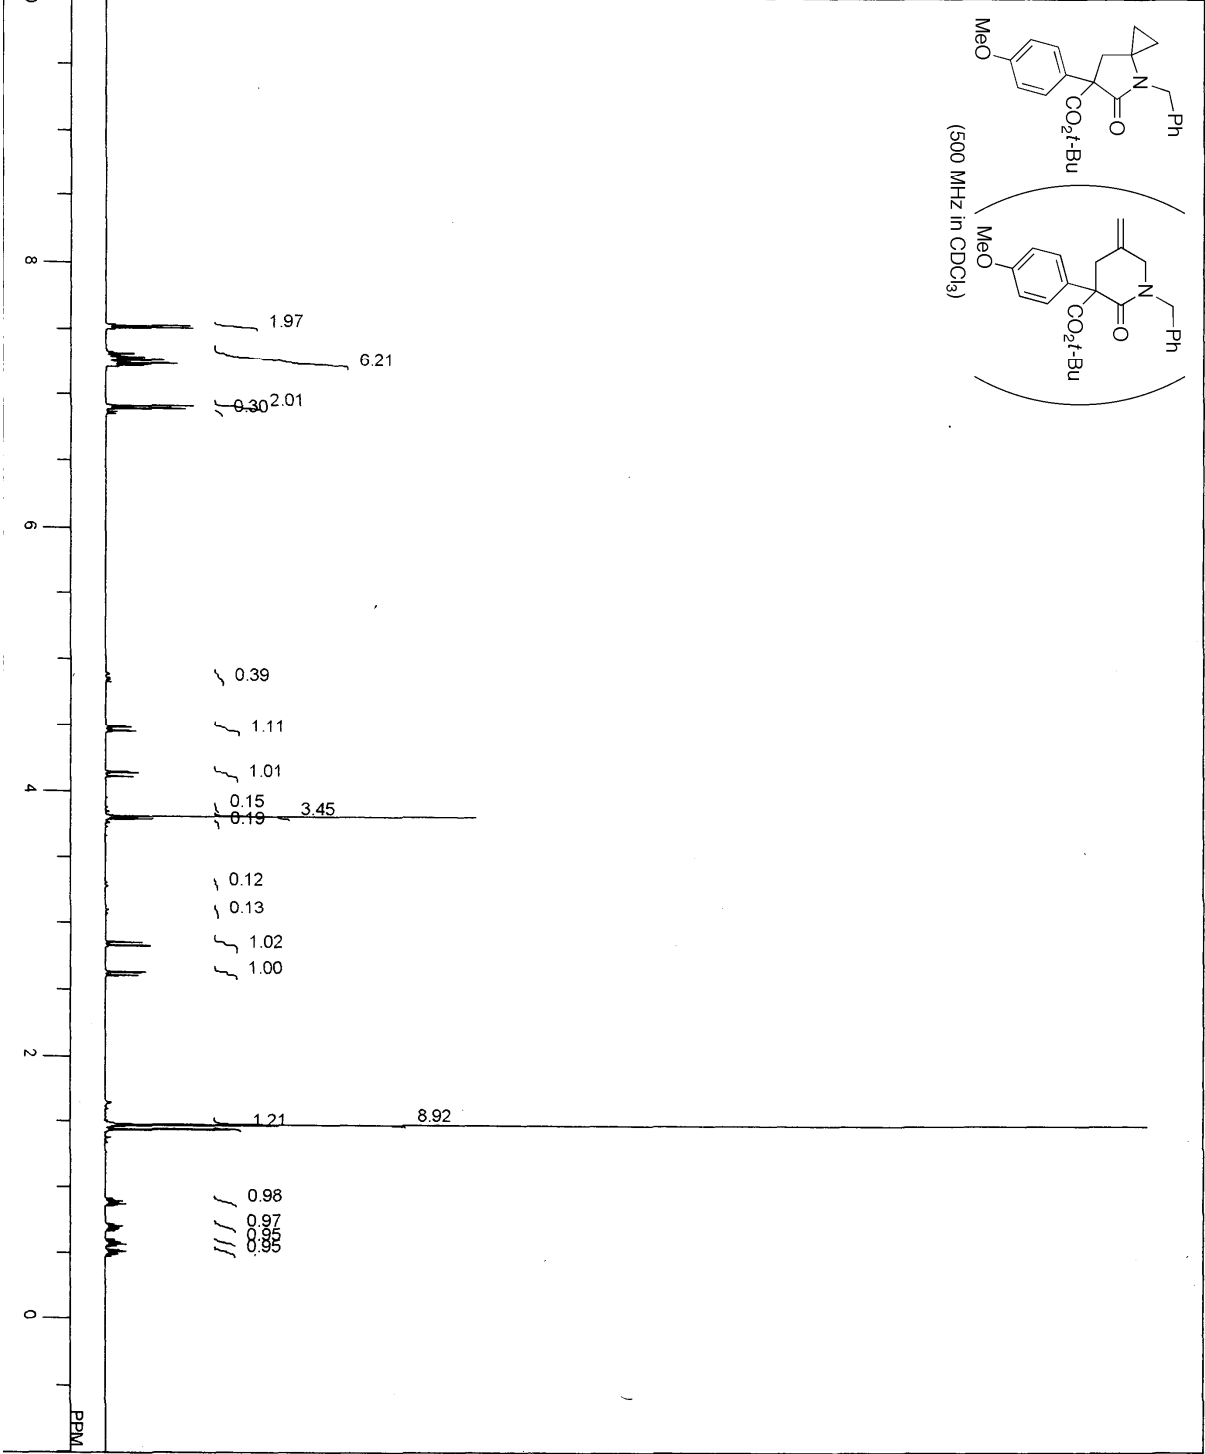

compound **3ca(+4ca)**

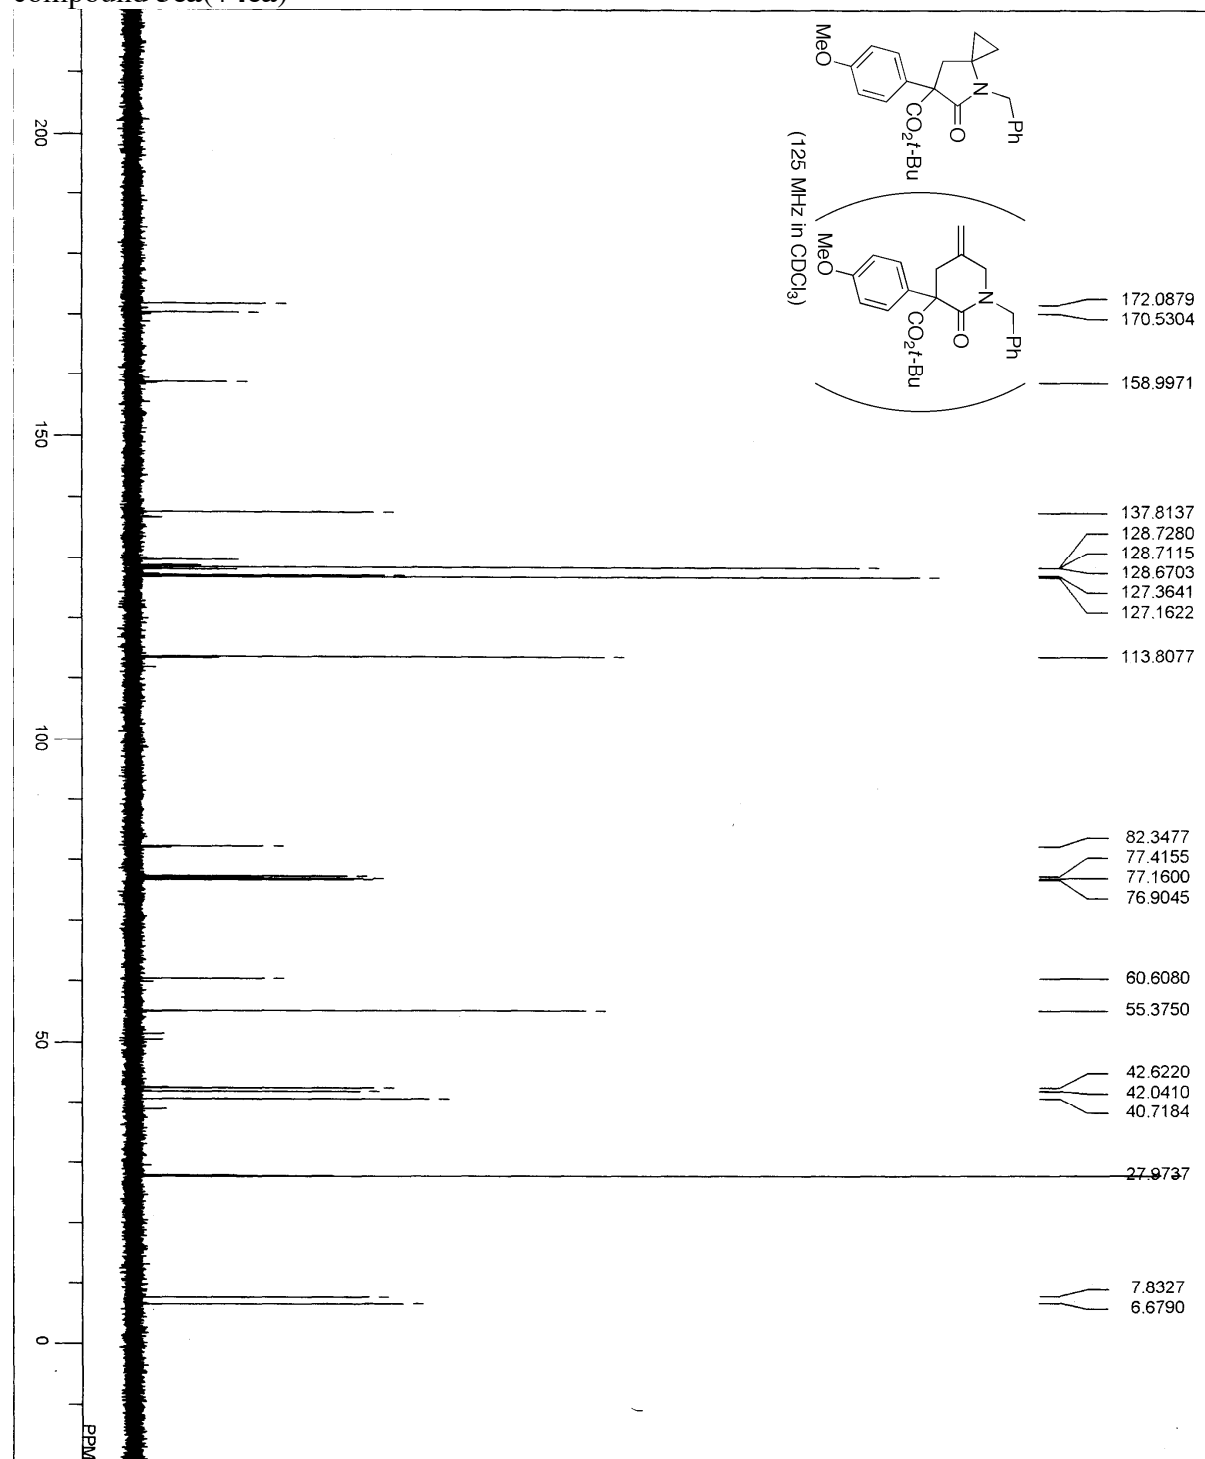



compound **3da**(+**4da**)

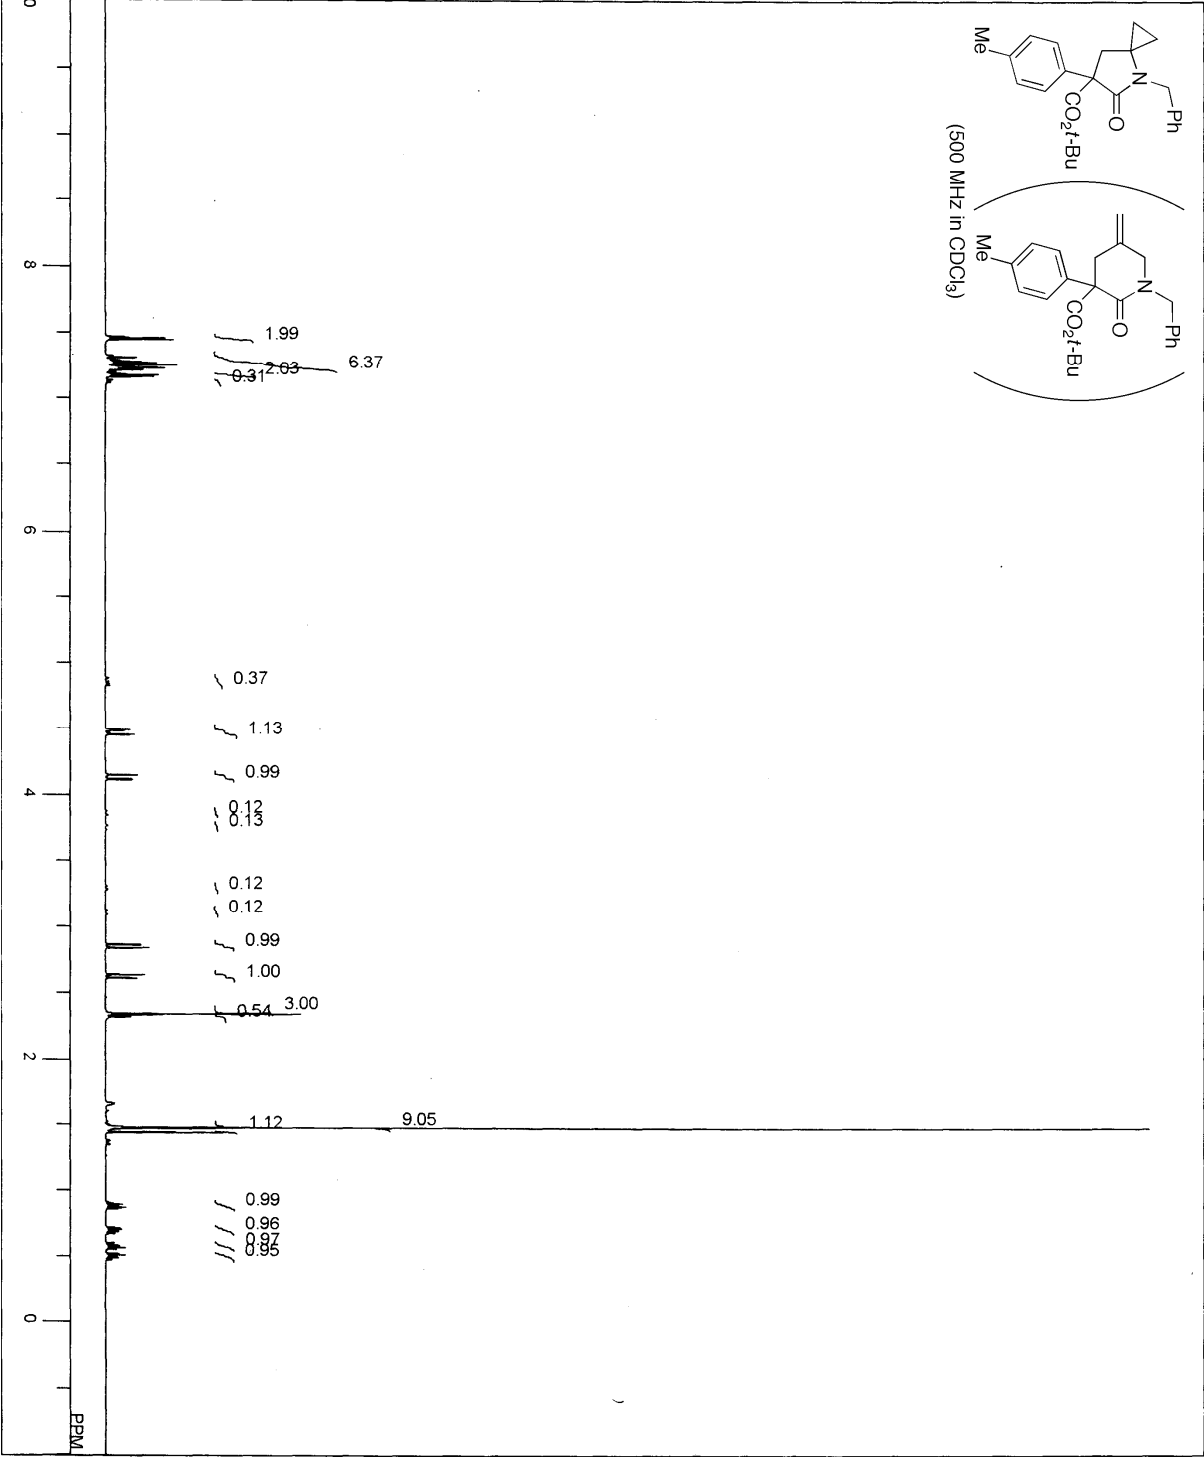

compound **3da(+4da)**

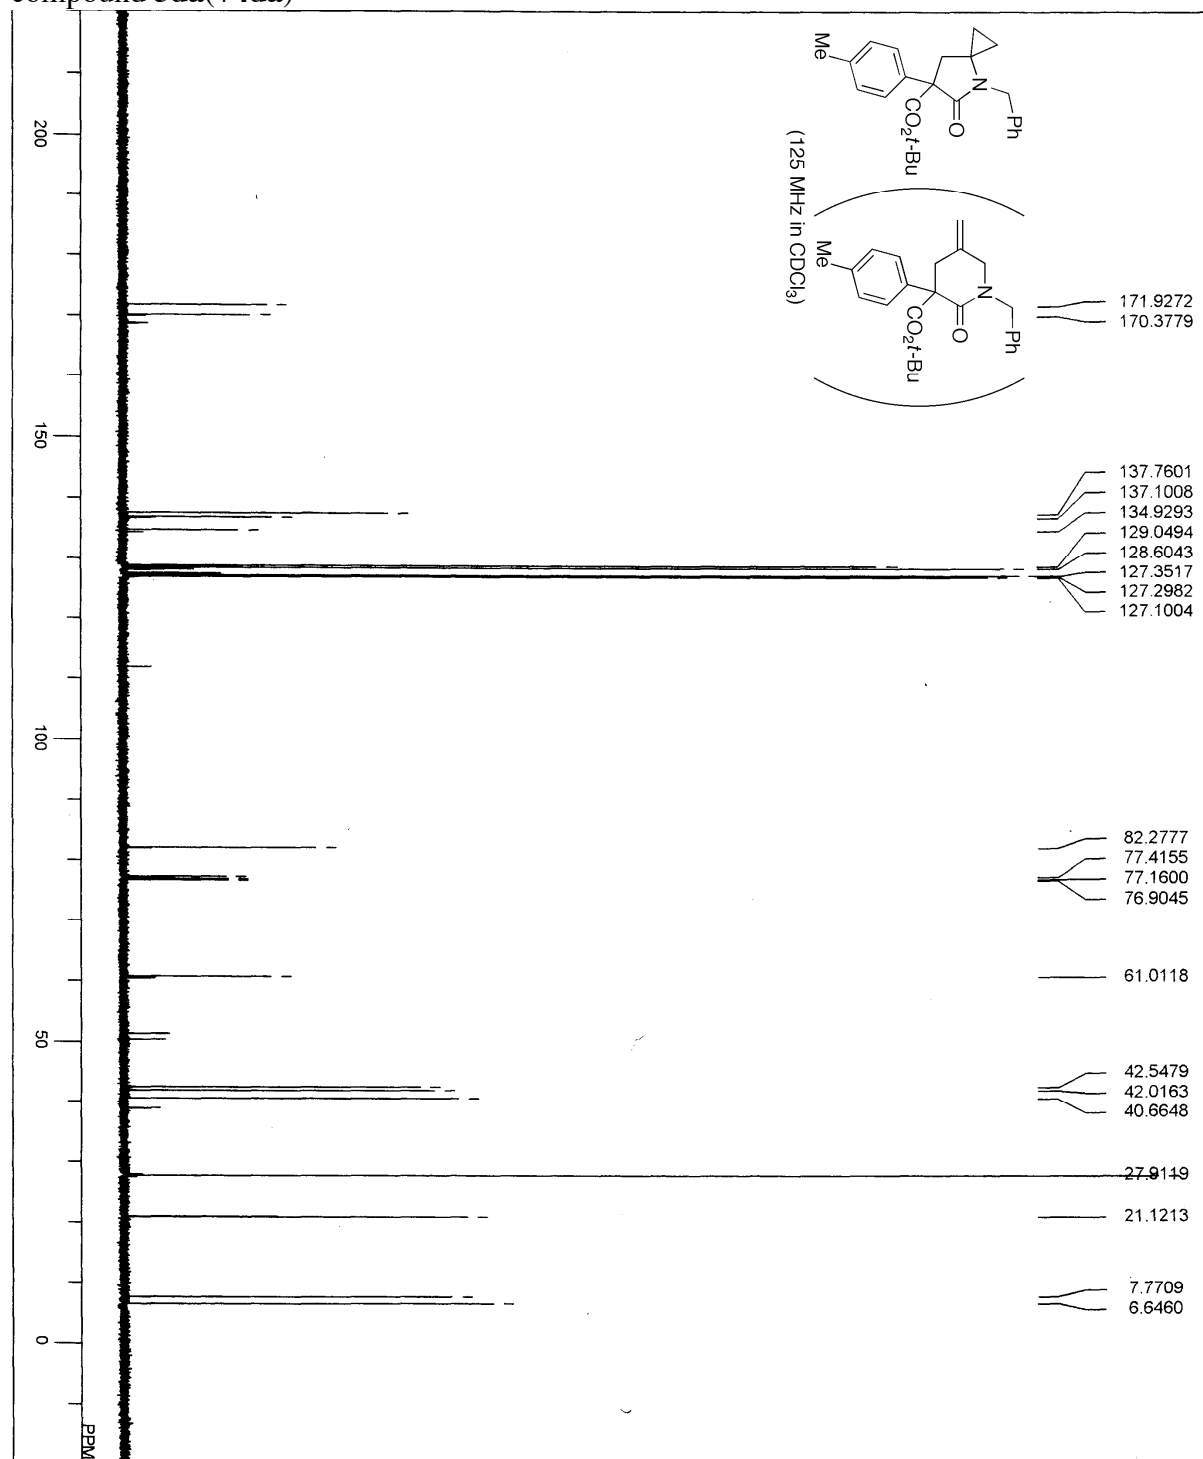

compound **3ea**(+**4ea**)

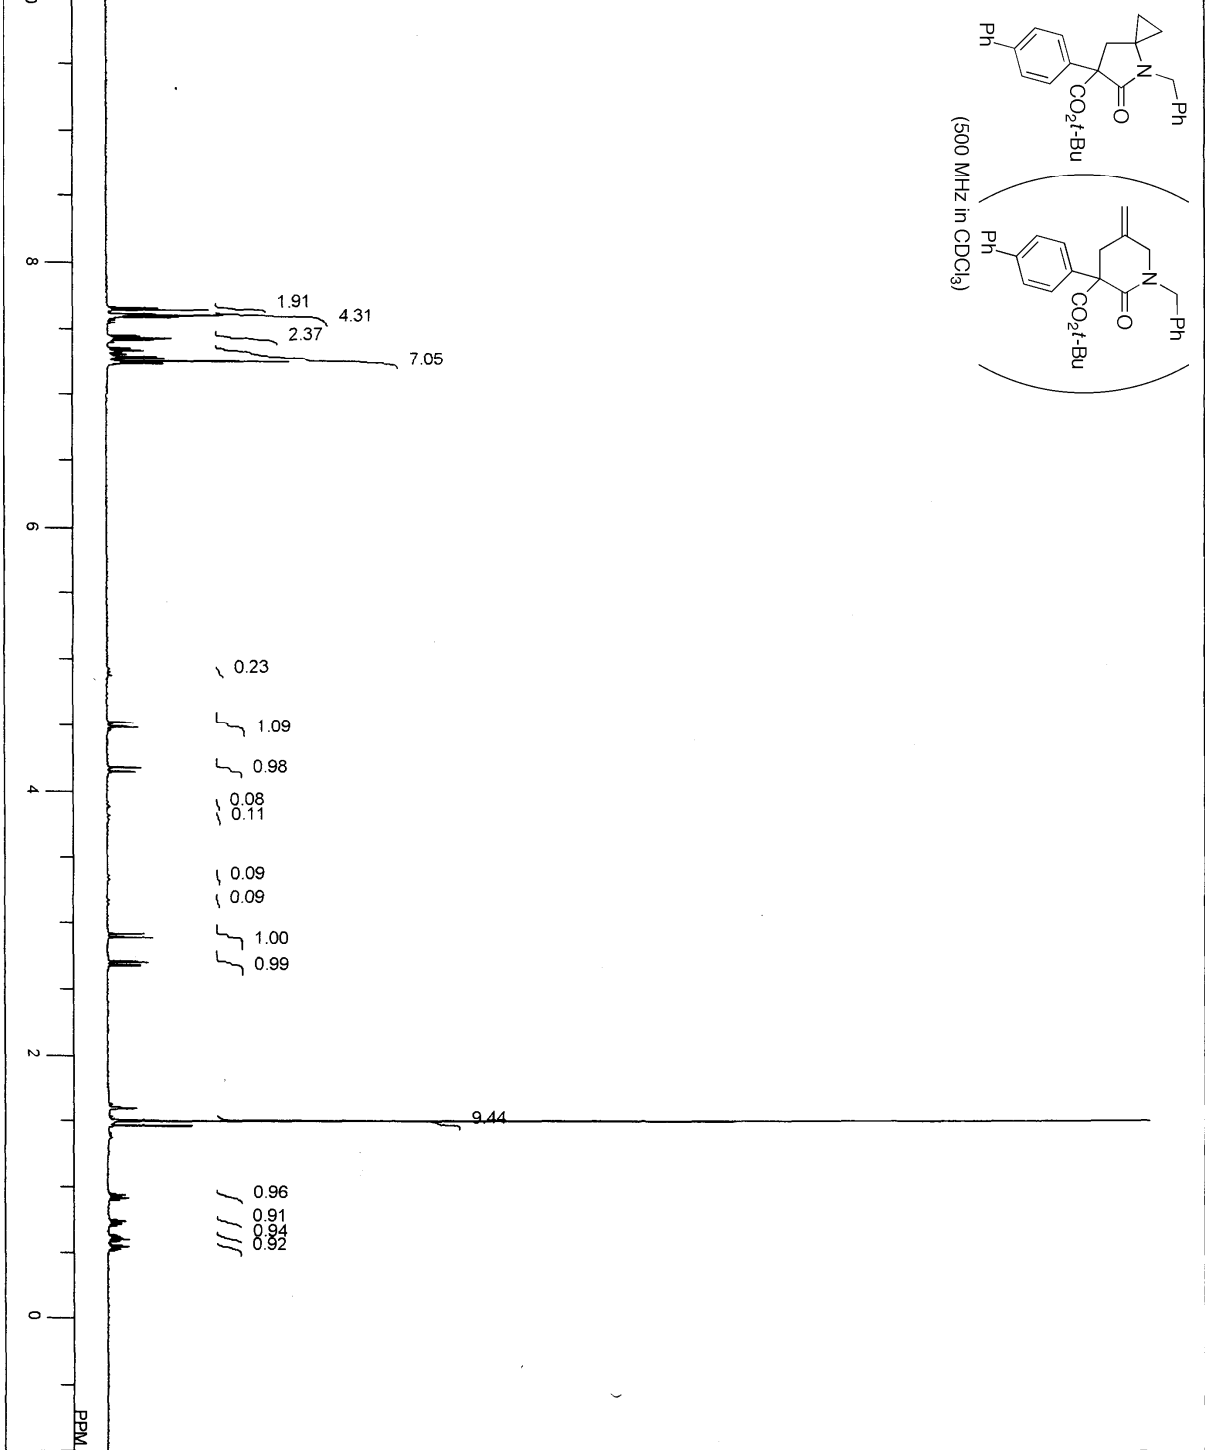

compound **3ea**(+4ea)

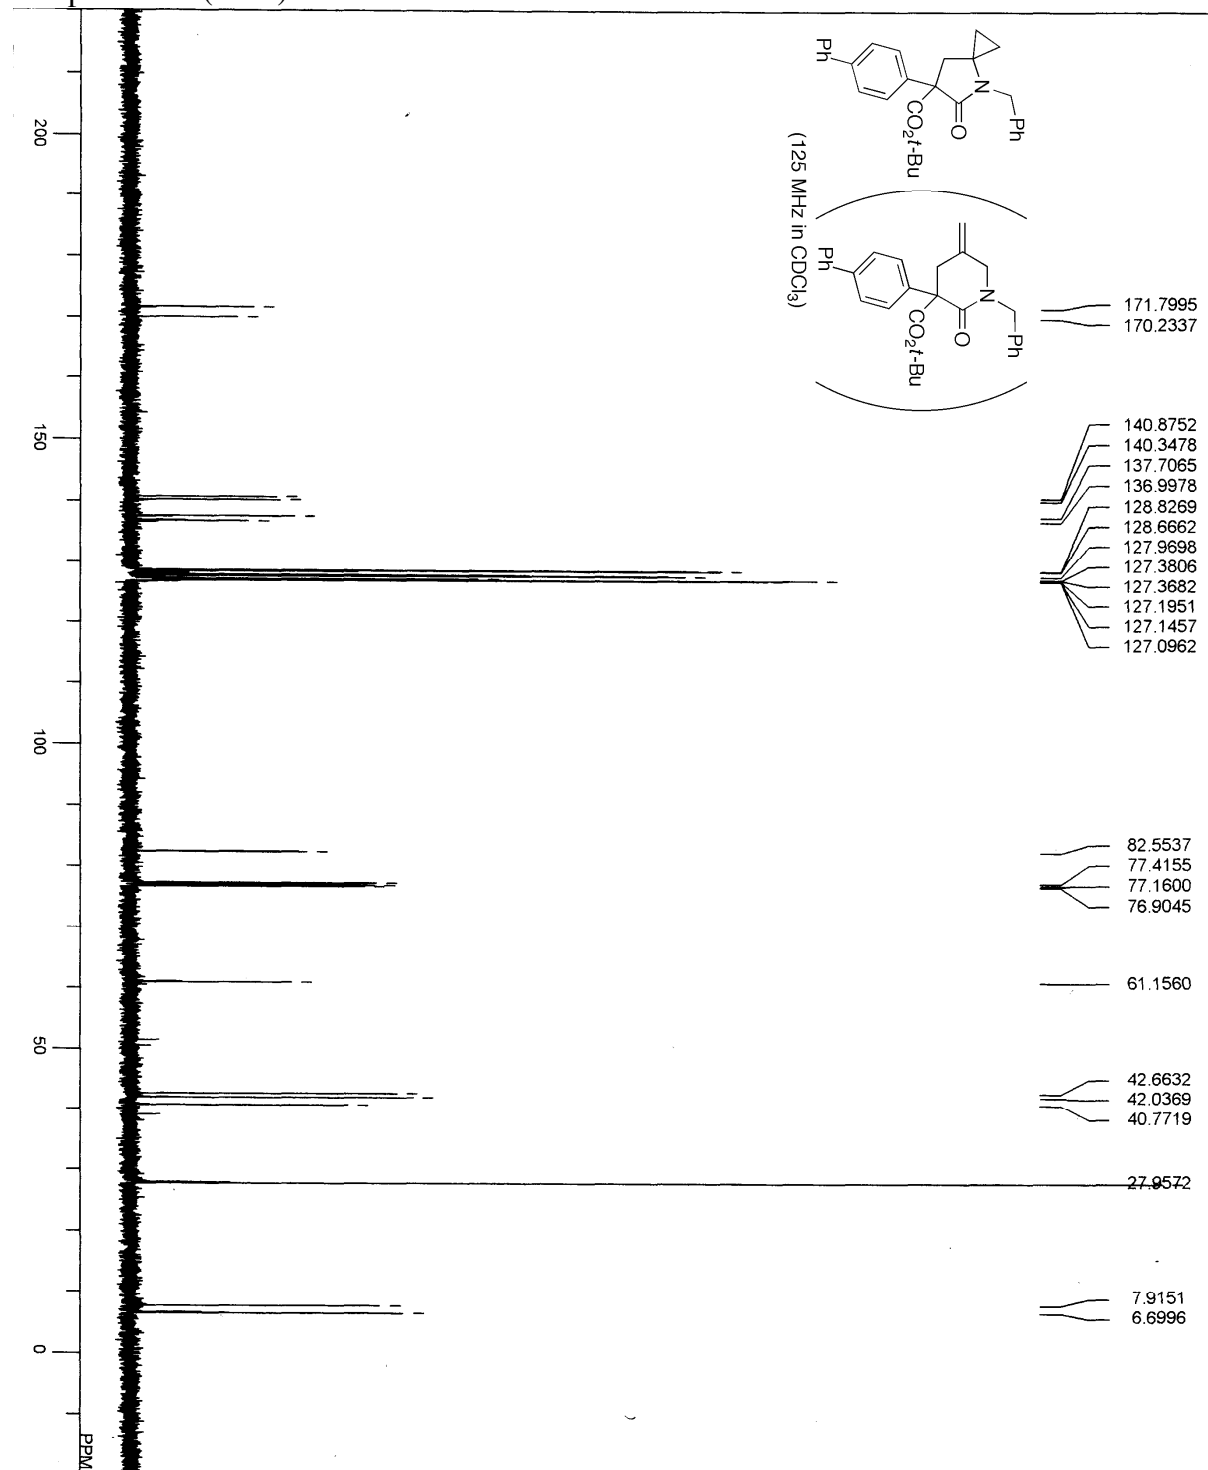

compound **3fa**(+**4fa**)

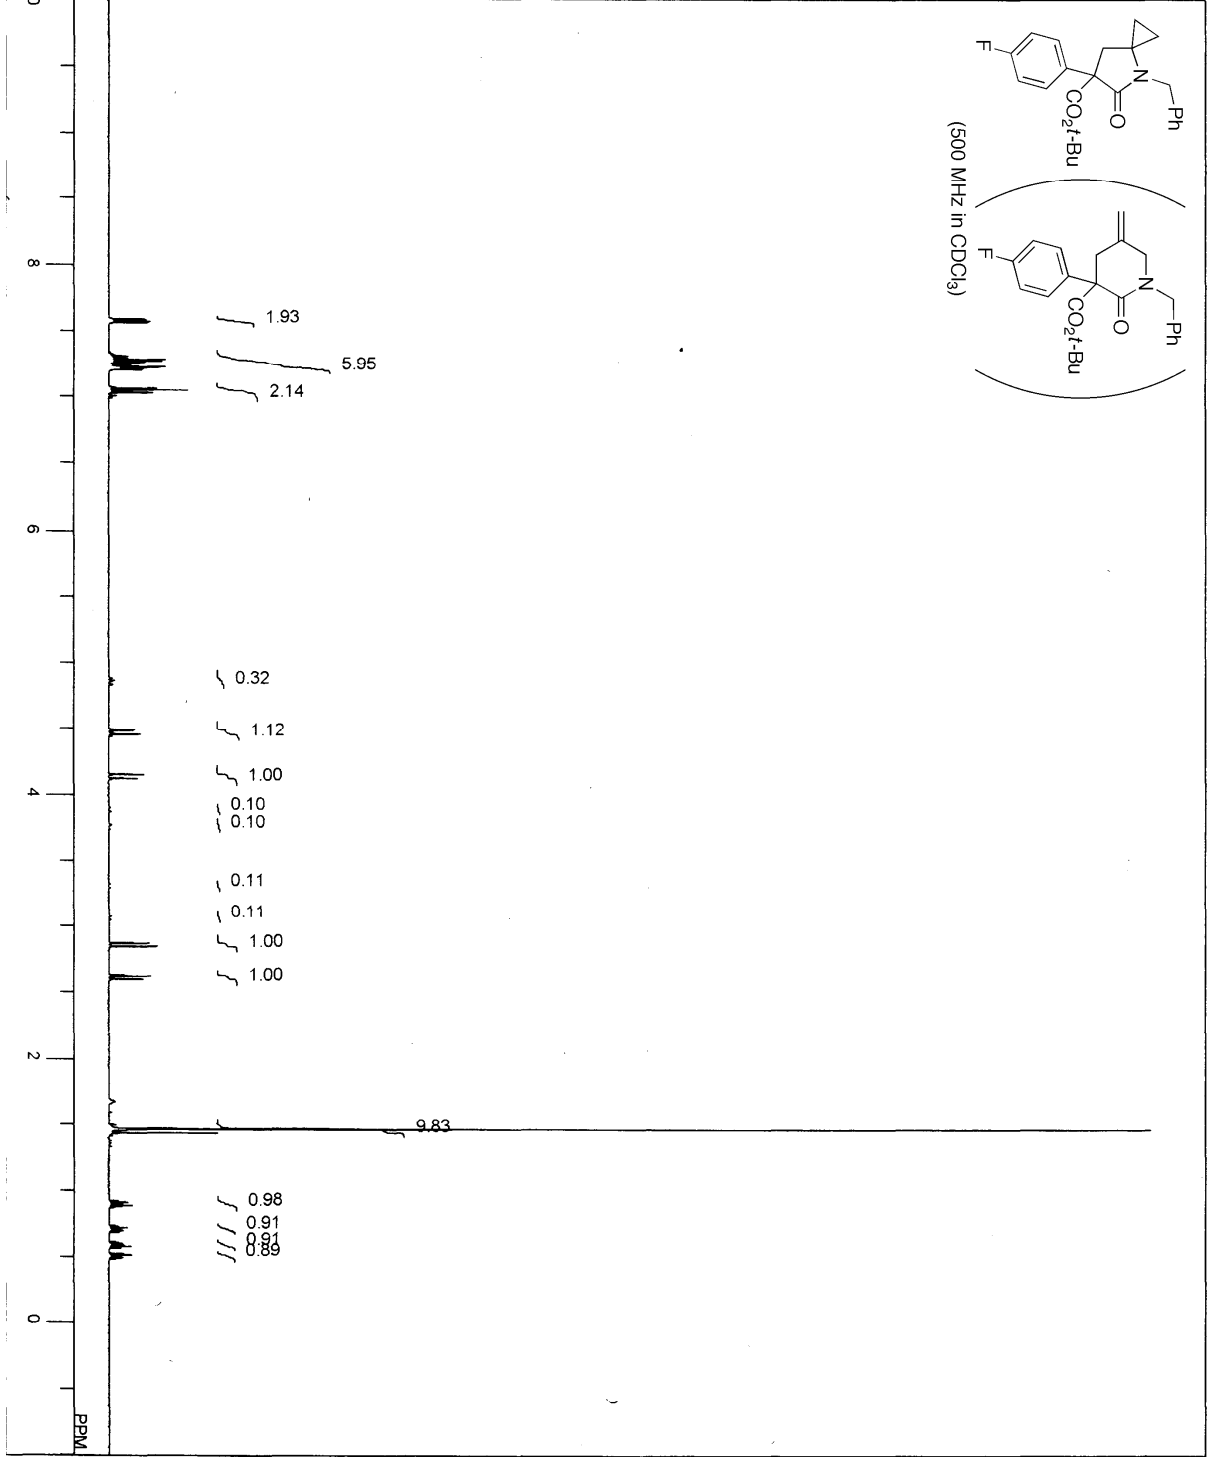

compound **3fa**(+4fa)

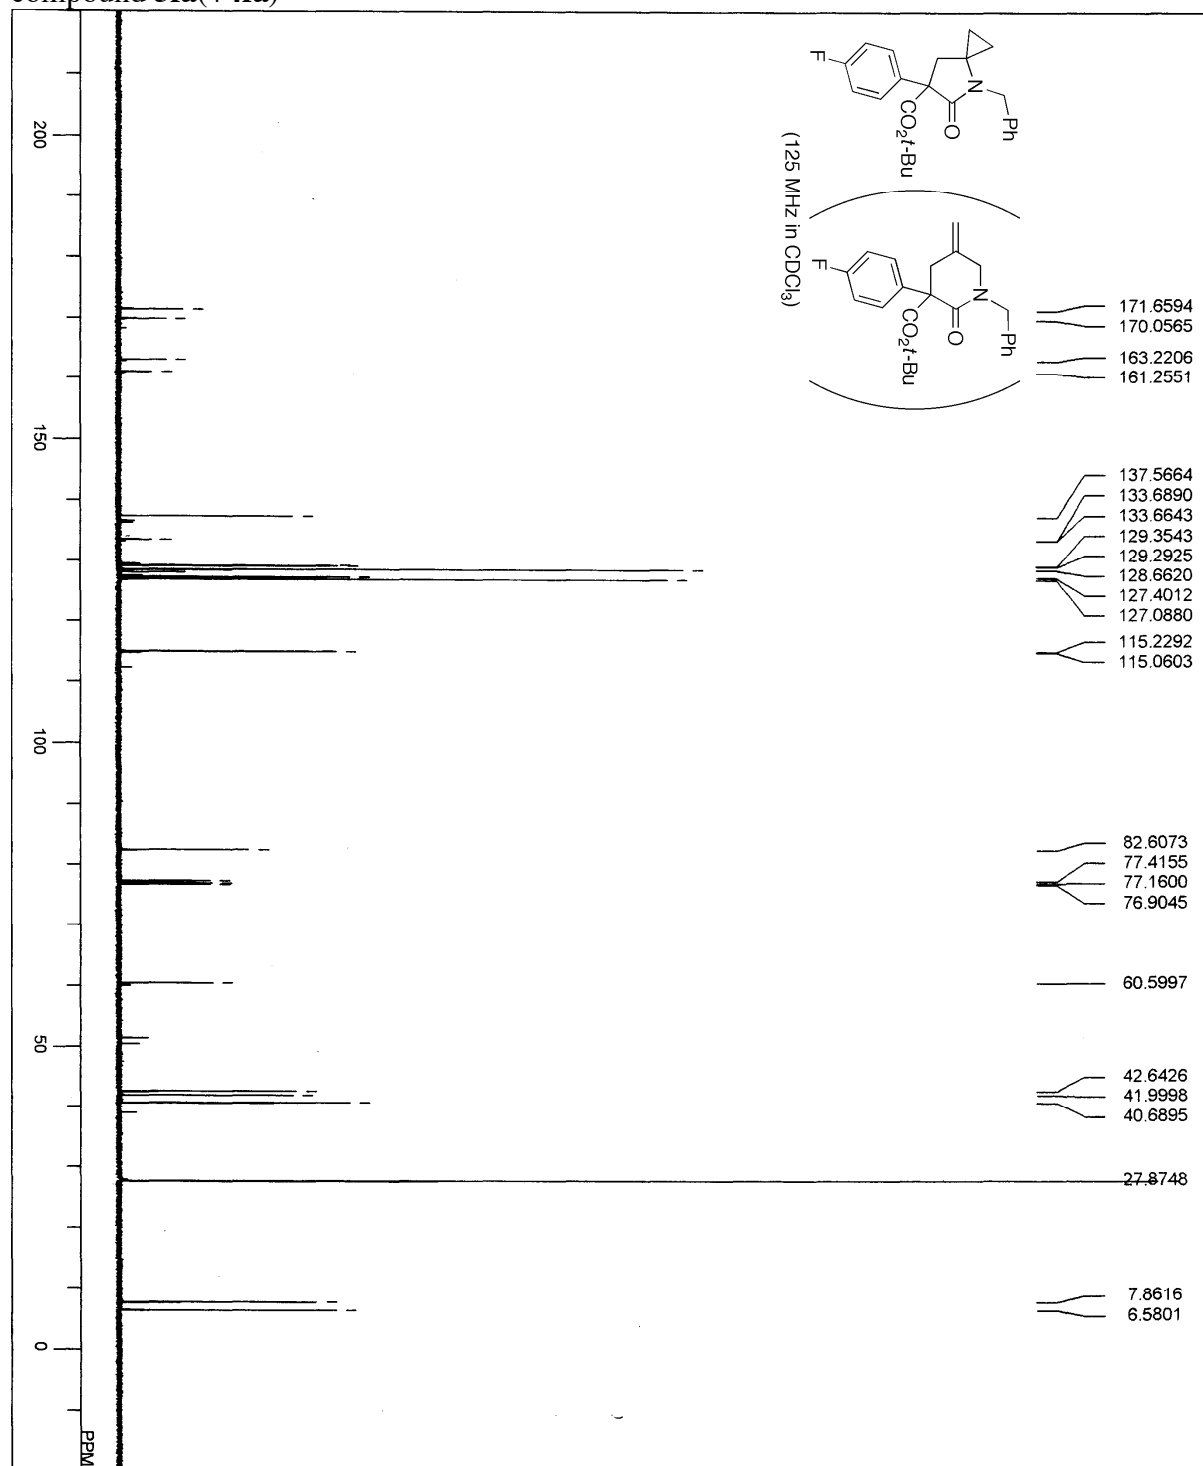

compound **3ga(+4ga)**

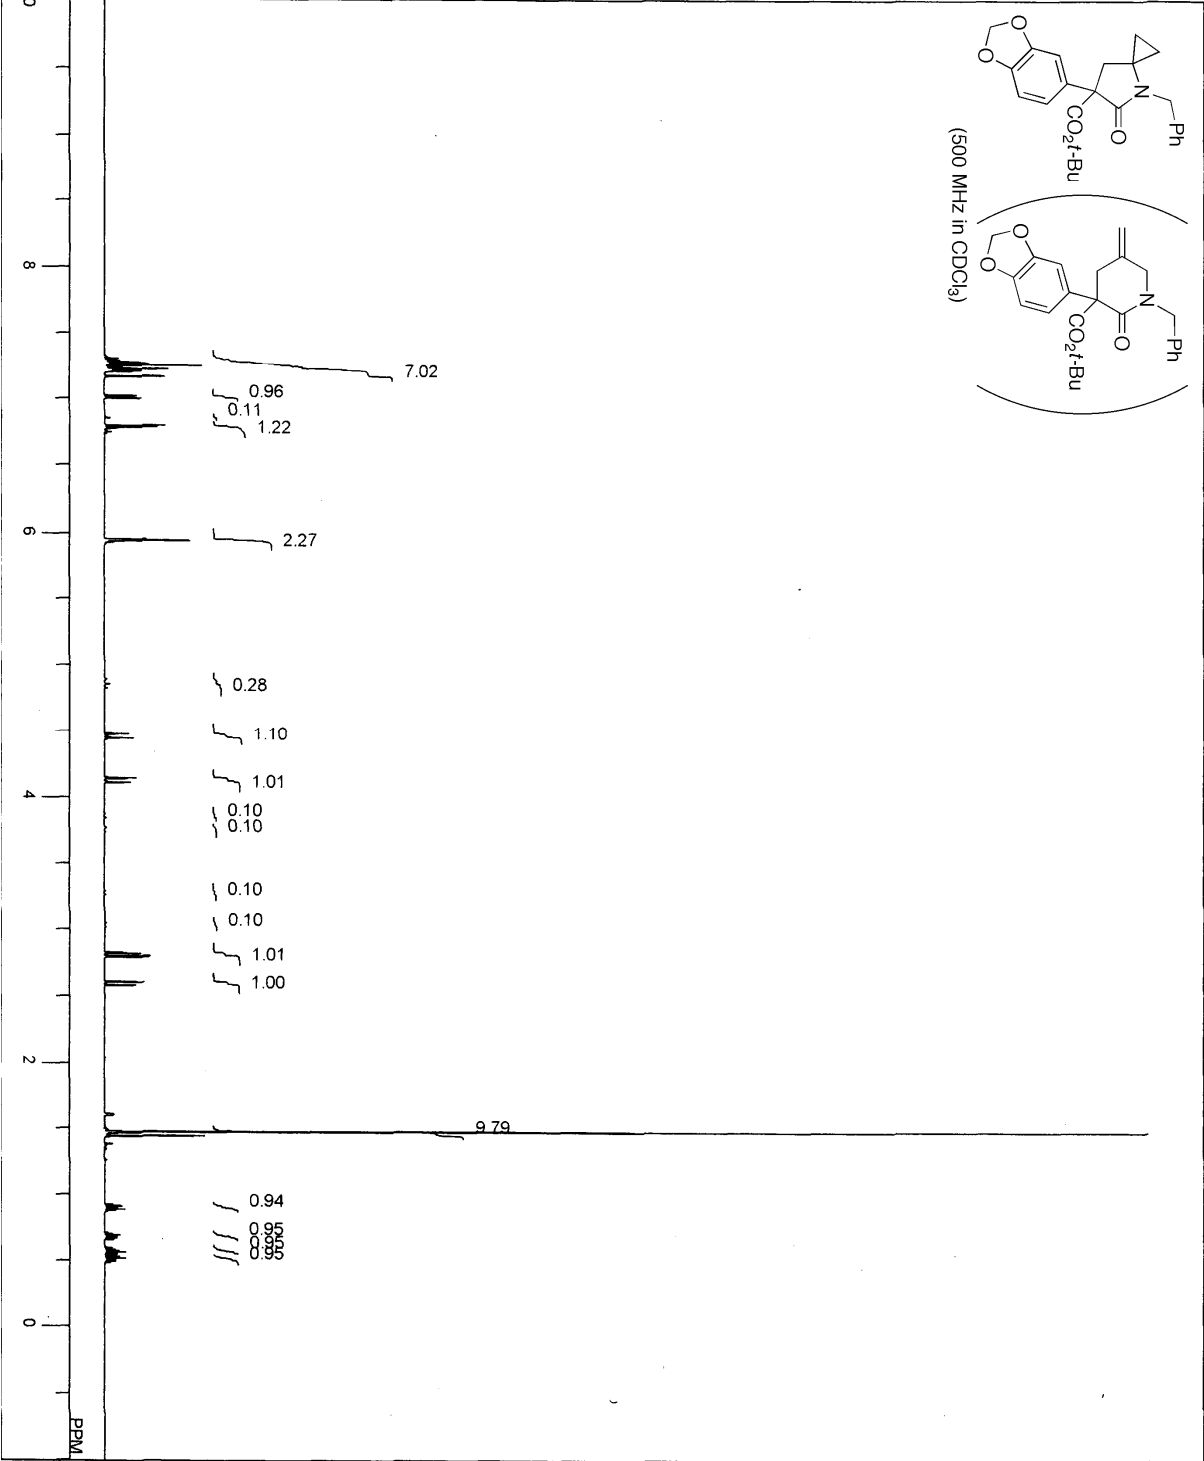

compound **3ga(+4ga)**

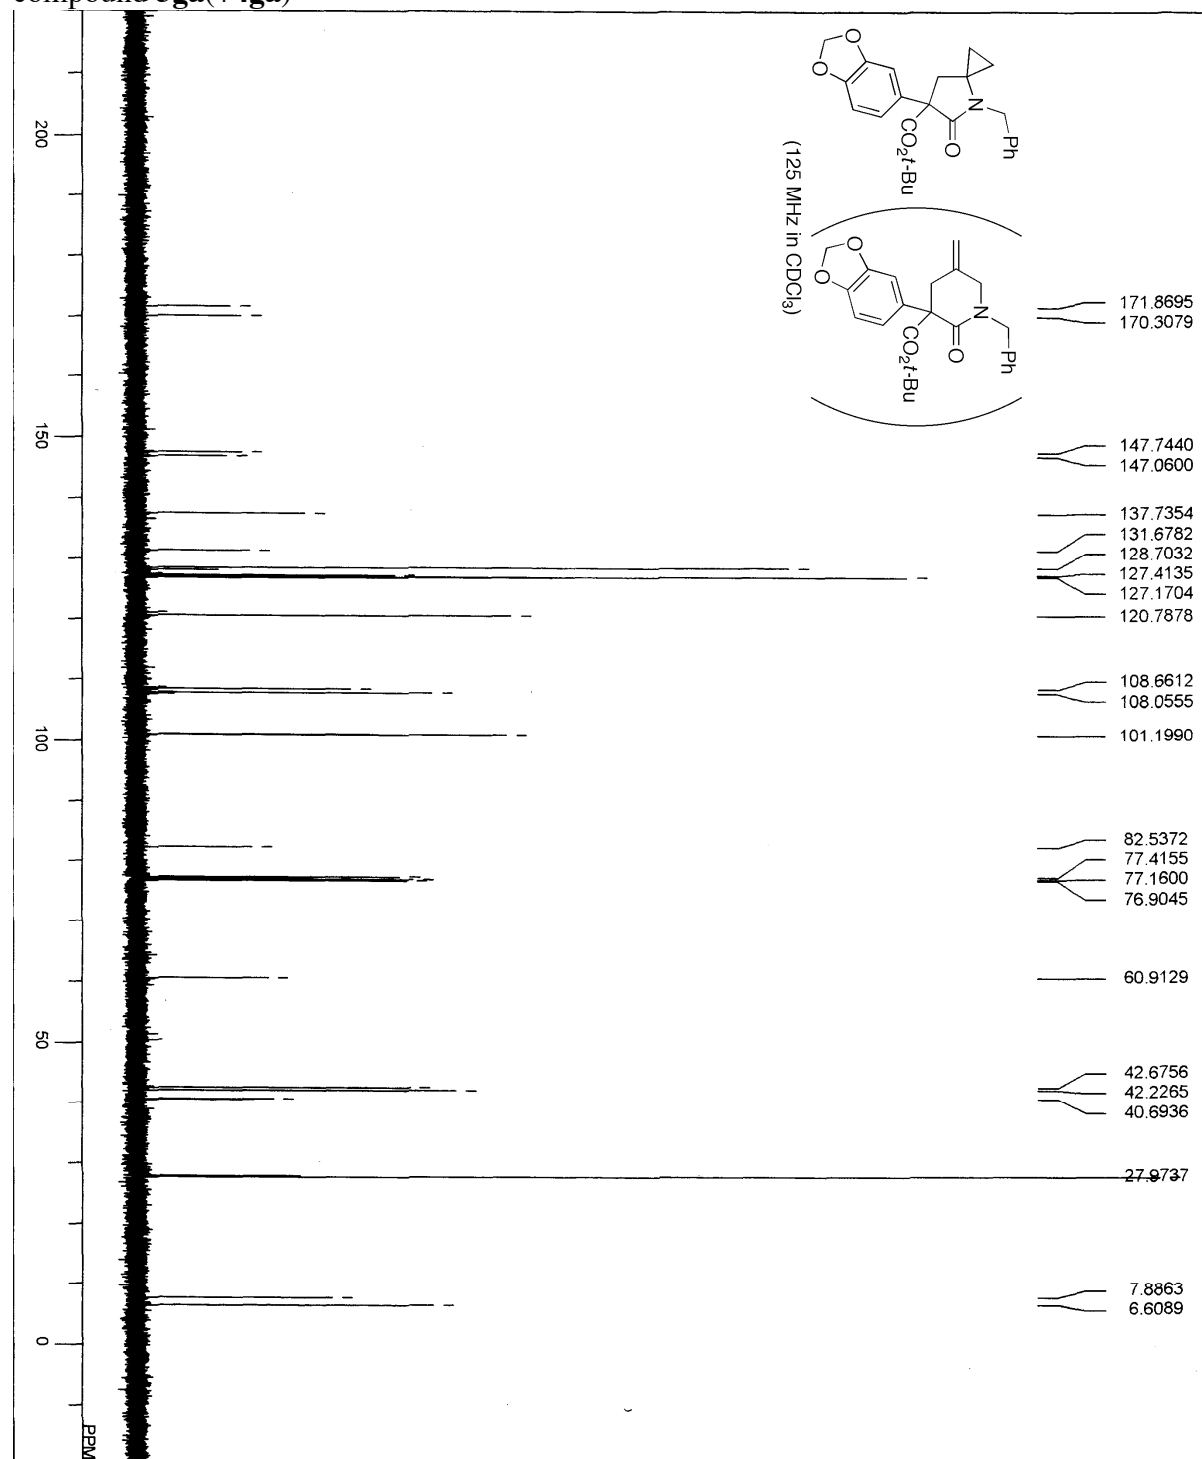



compound **3ha**(+4**ha**)

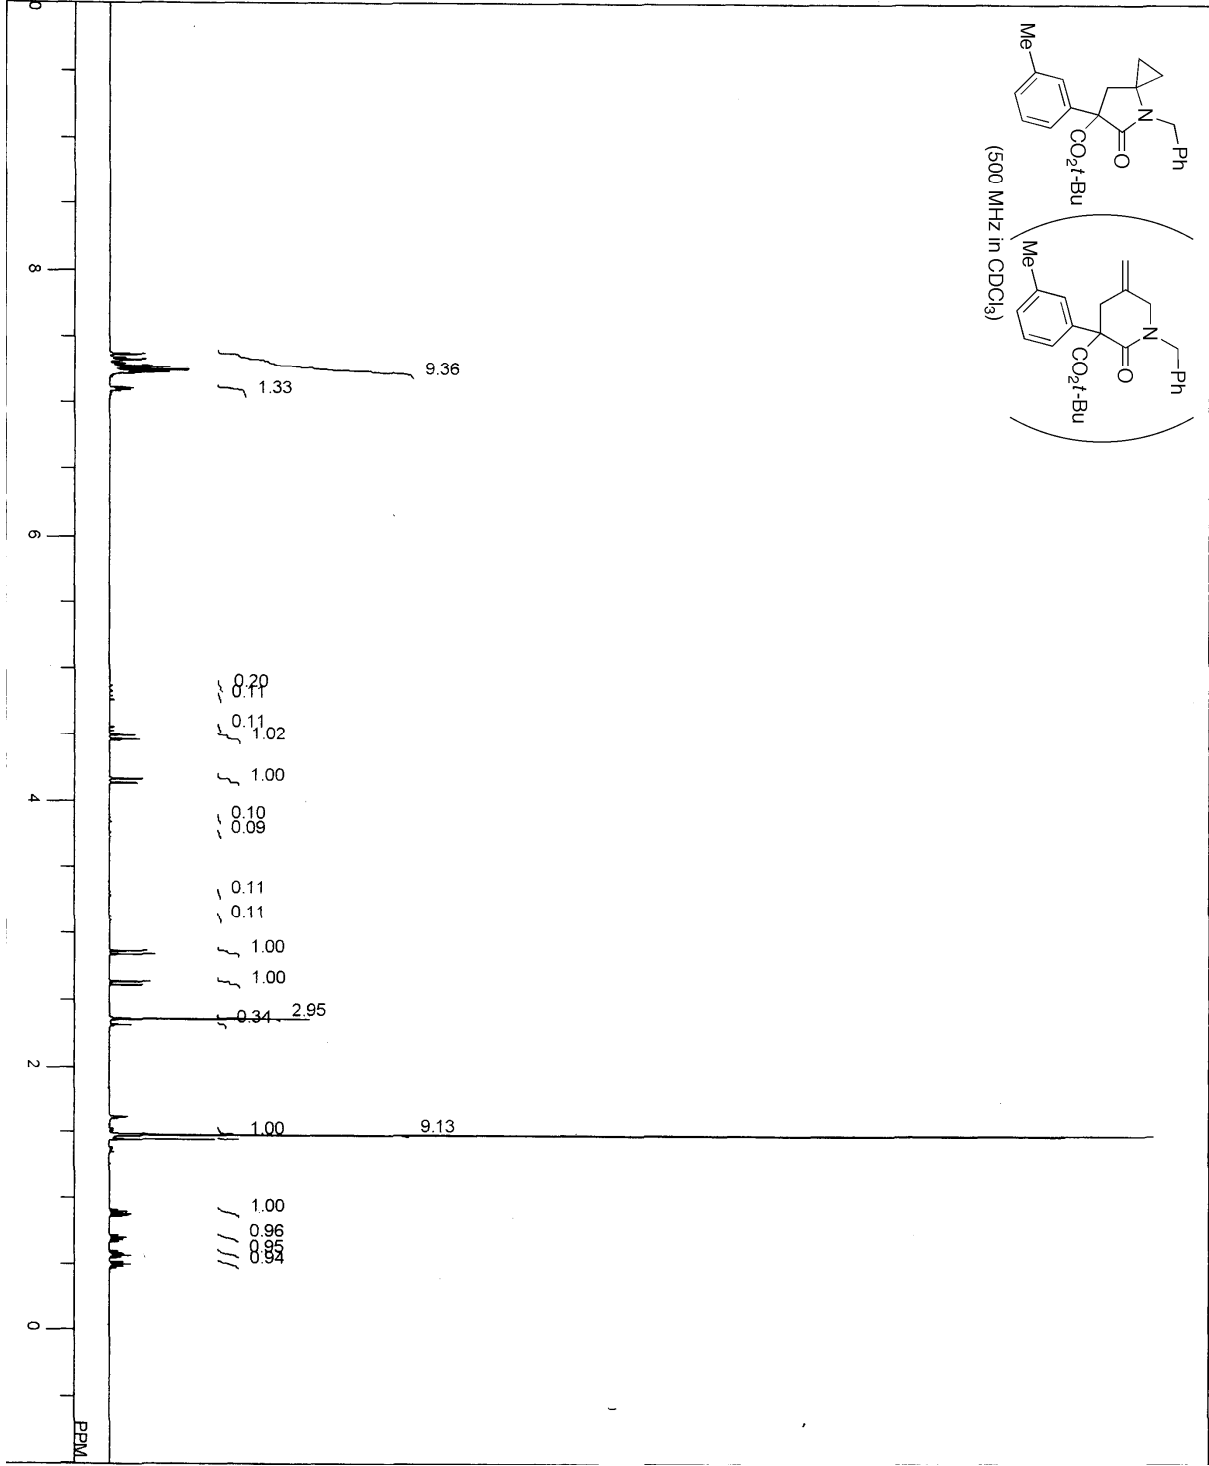

compound **3ha**(+4ha)

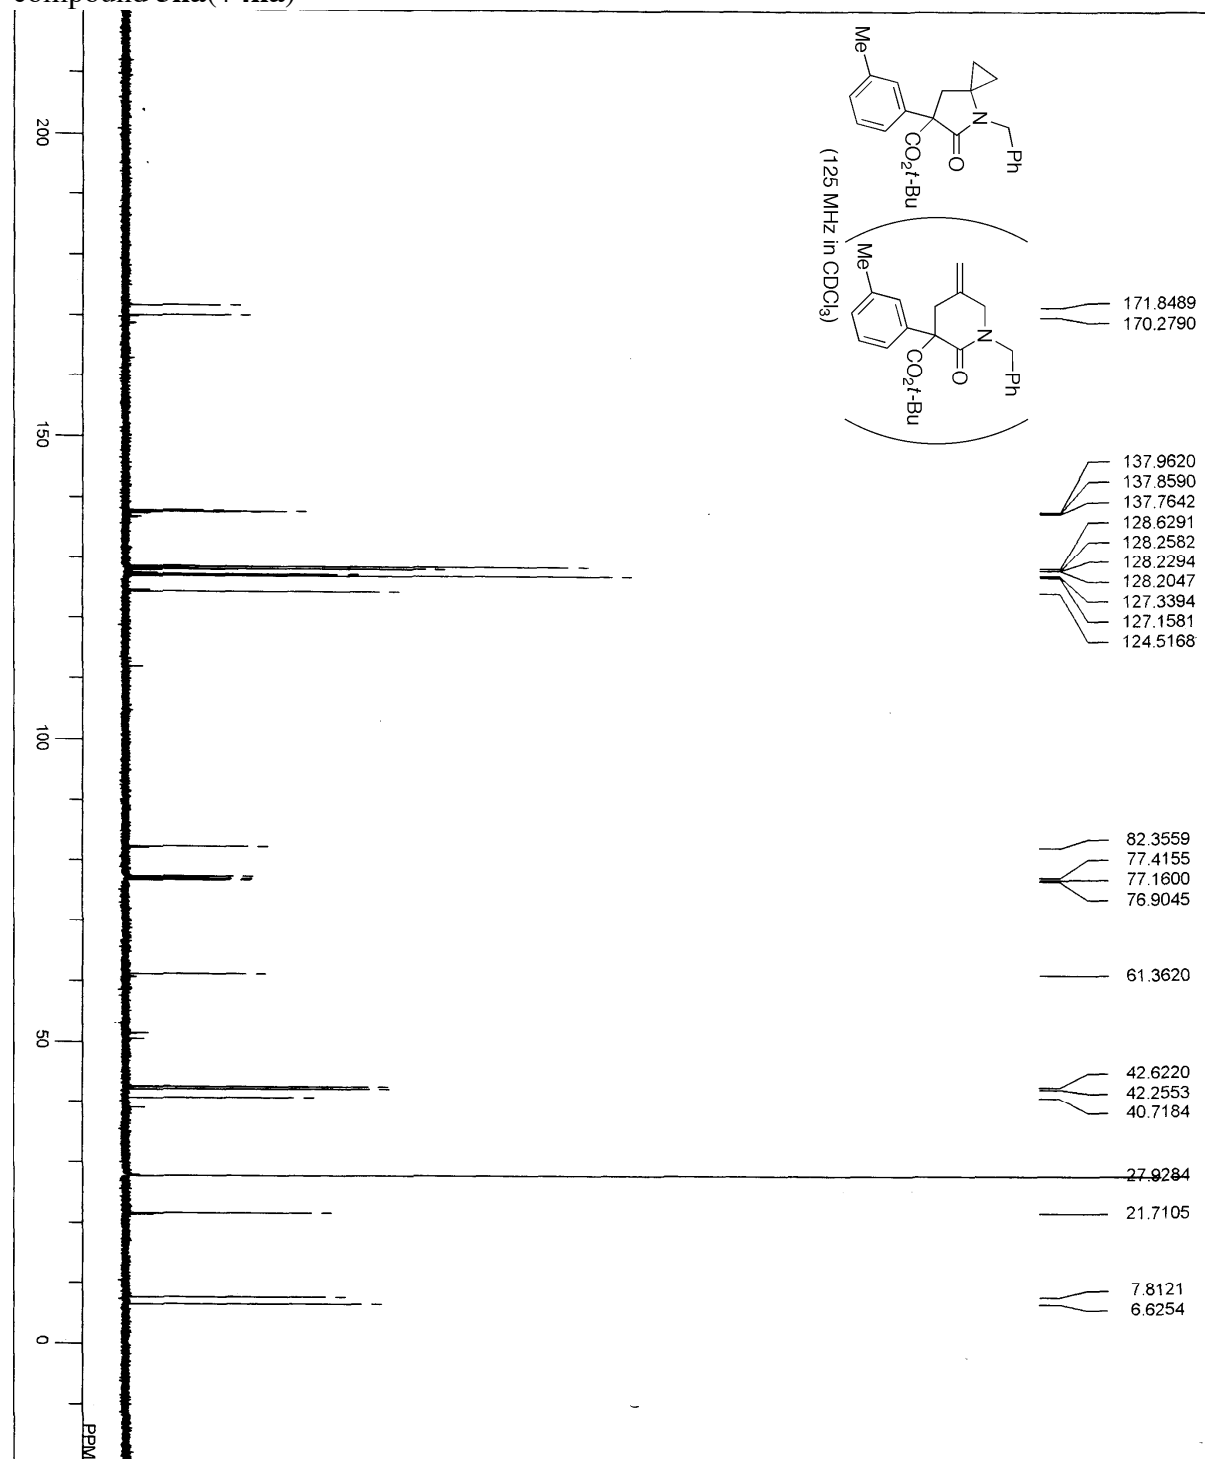

compound **3ia**(+**4ia**)

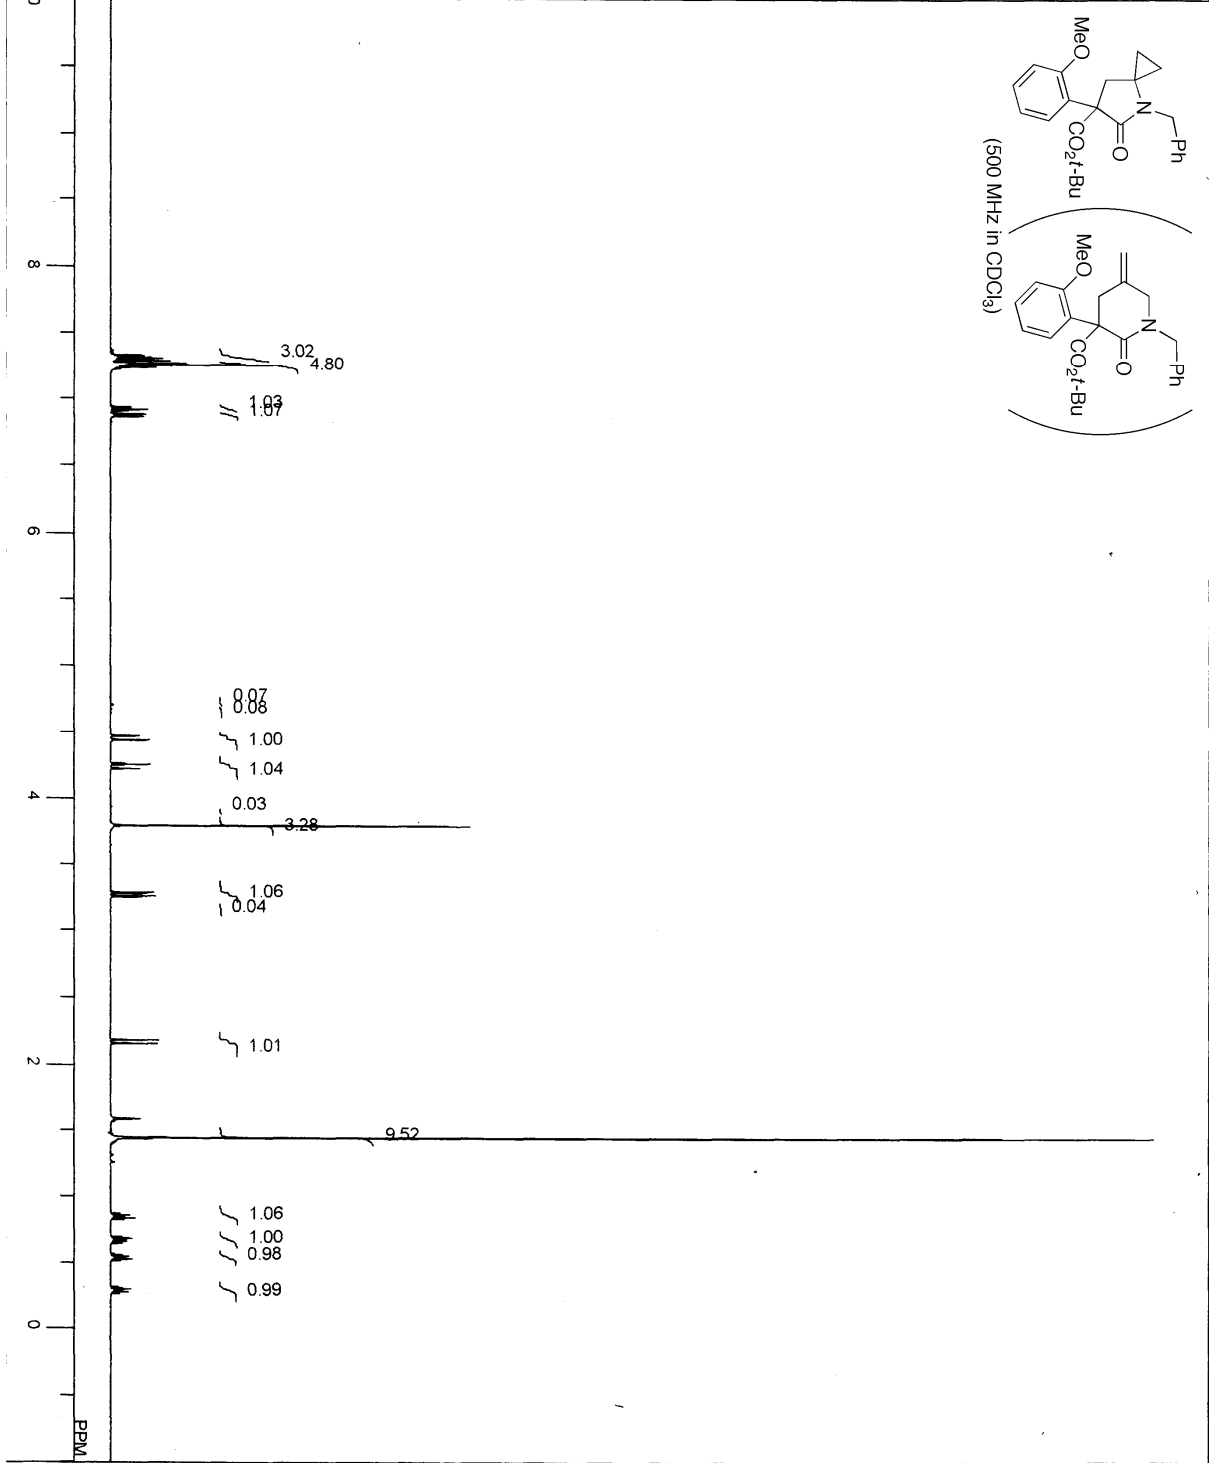

compound **3ia**(+**4ia**)

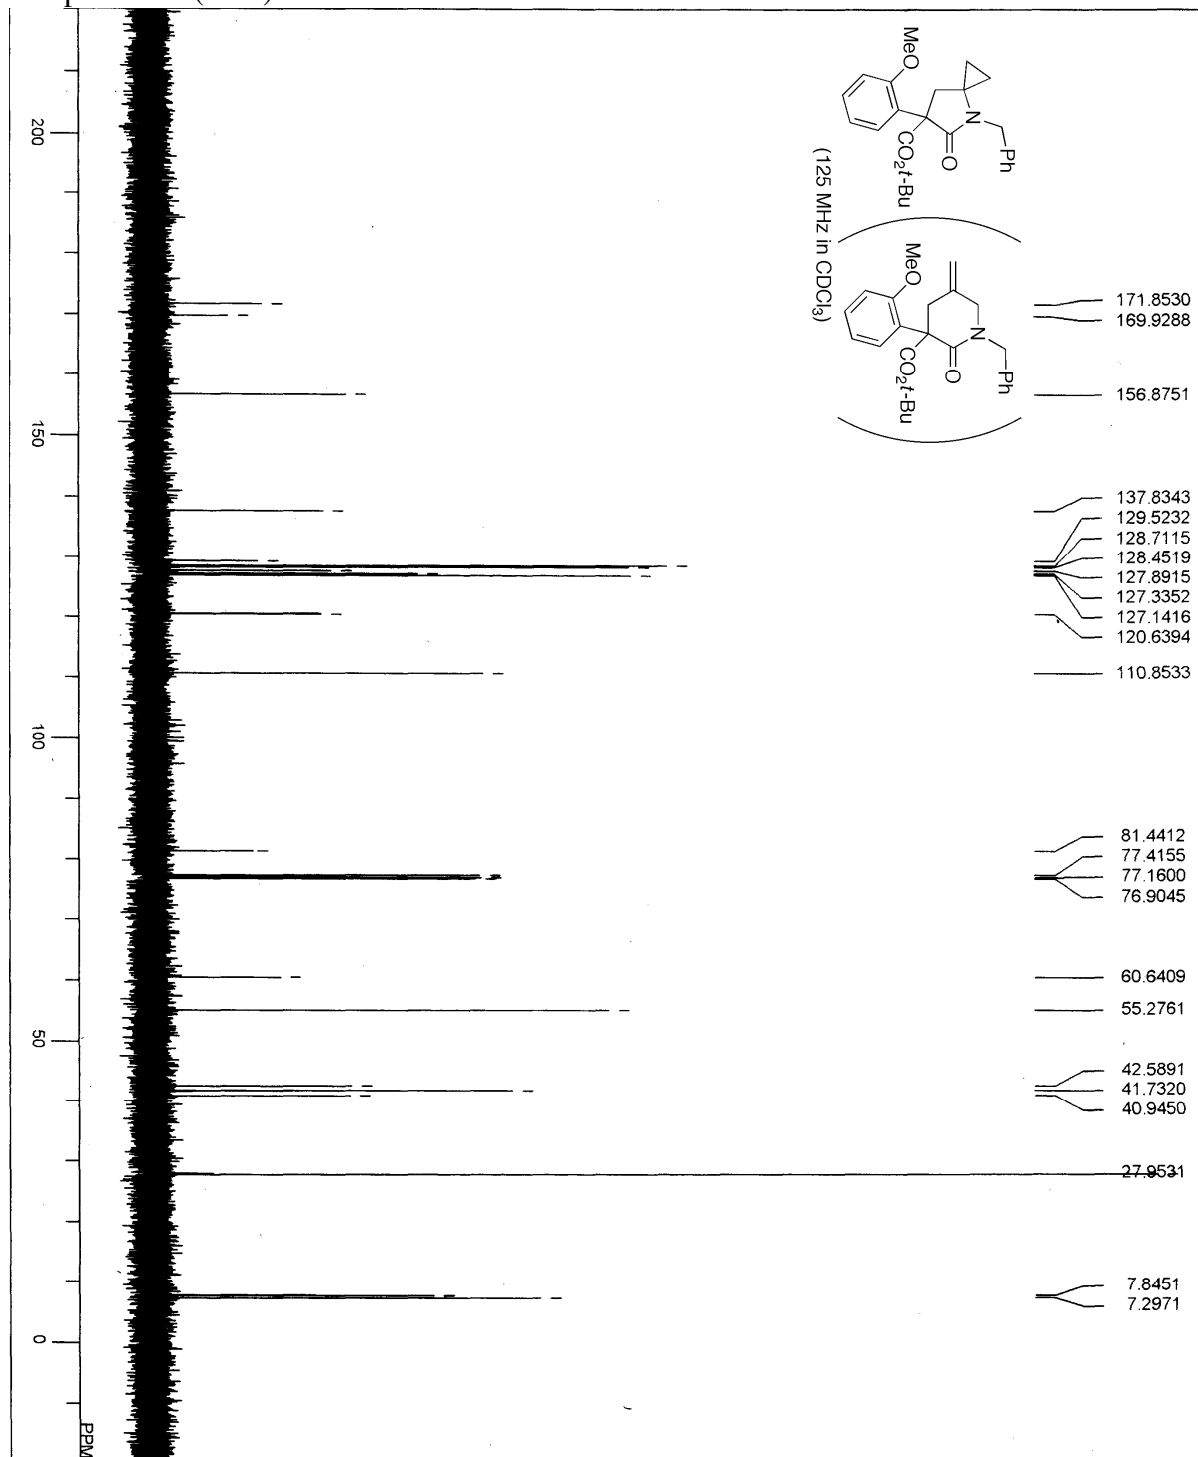

compound **4ah**(+3**ah**)

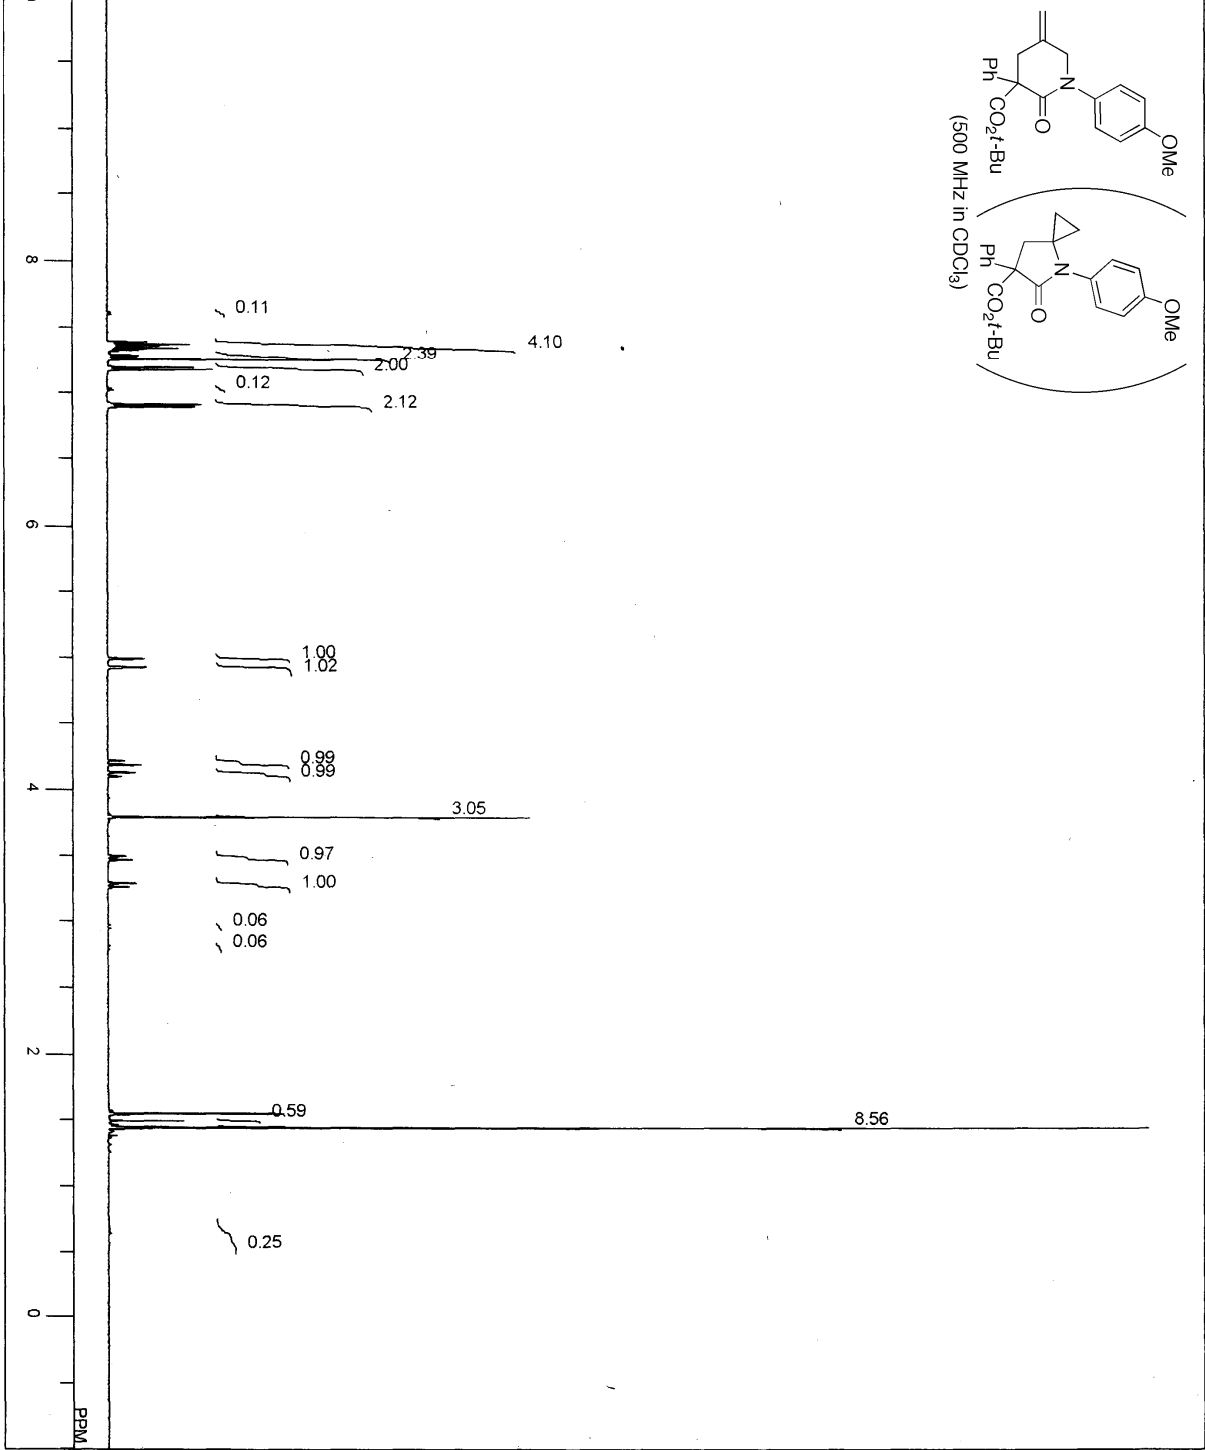

compound **4ah**(+3ah)

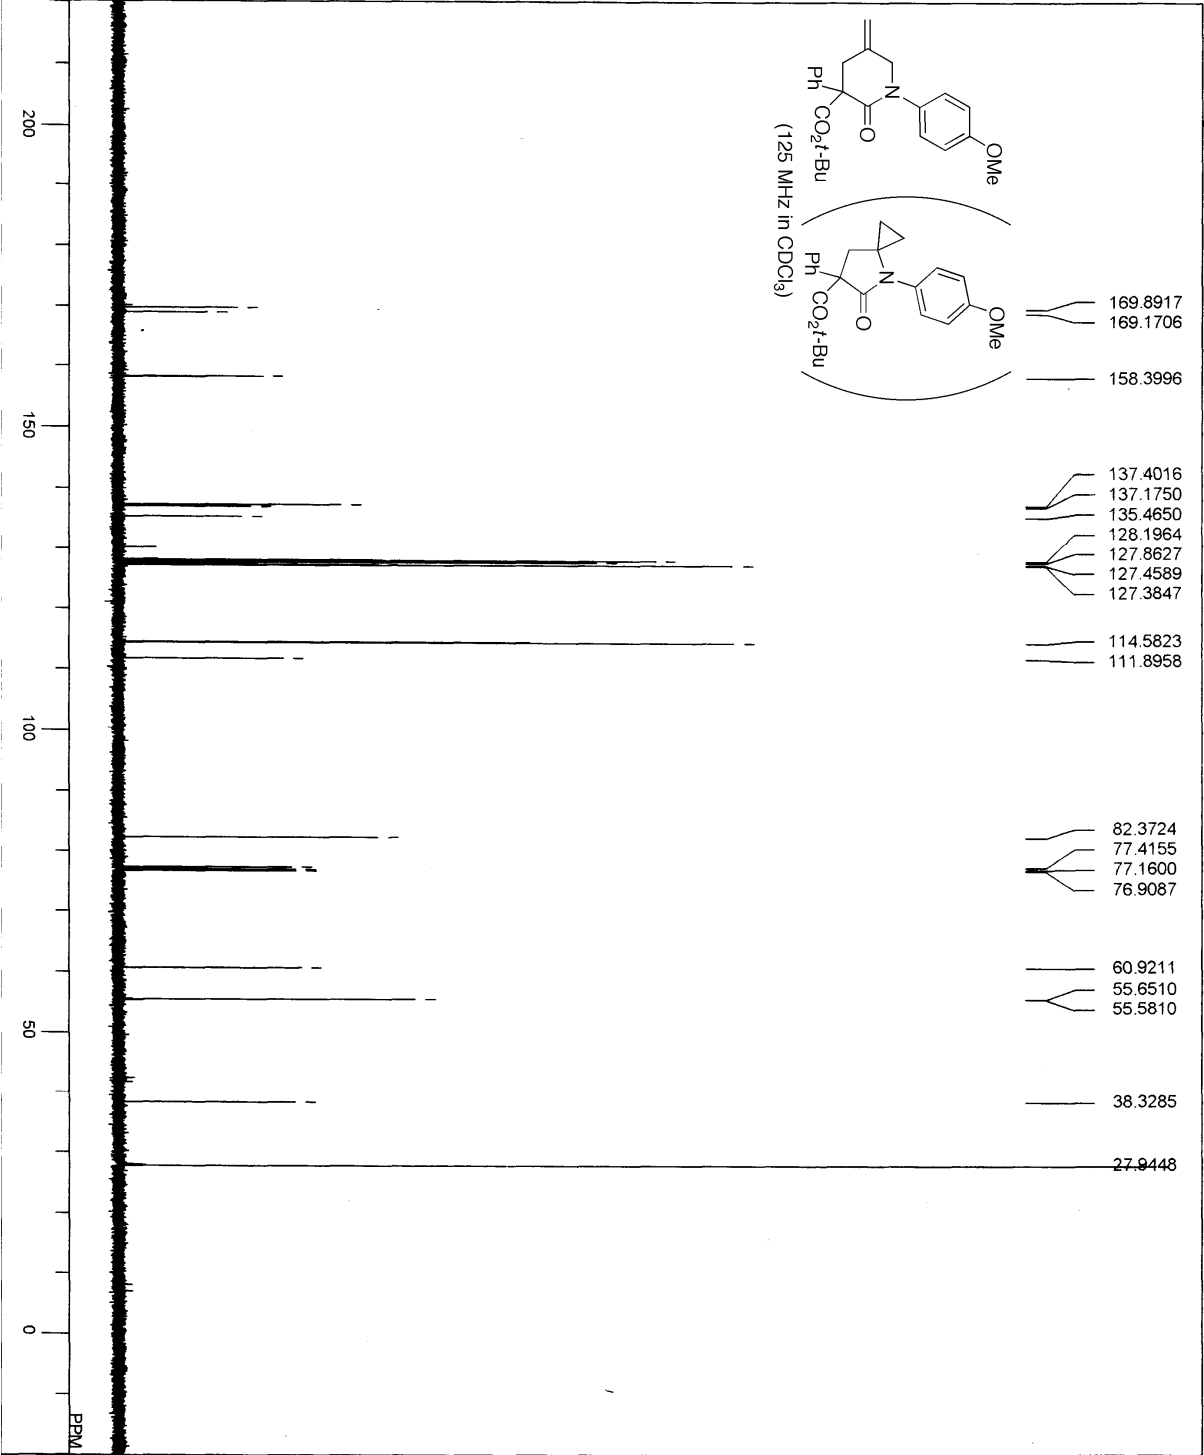



compound **4ai**(+**3ai**)

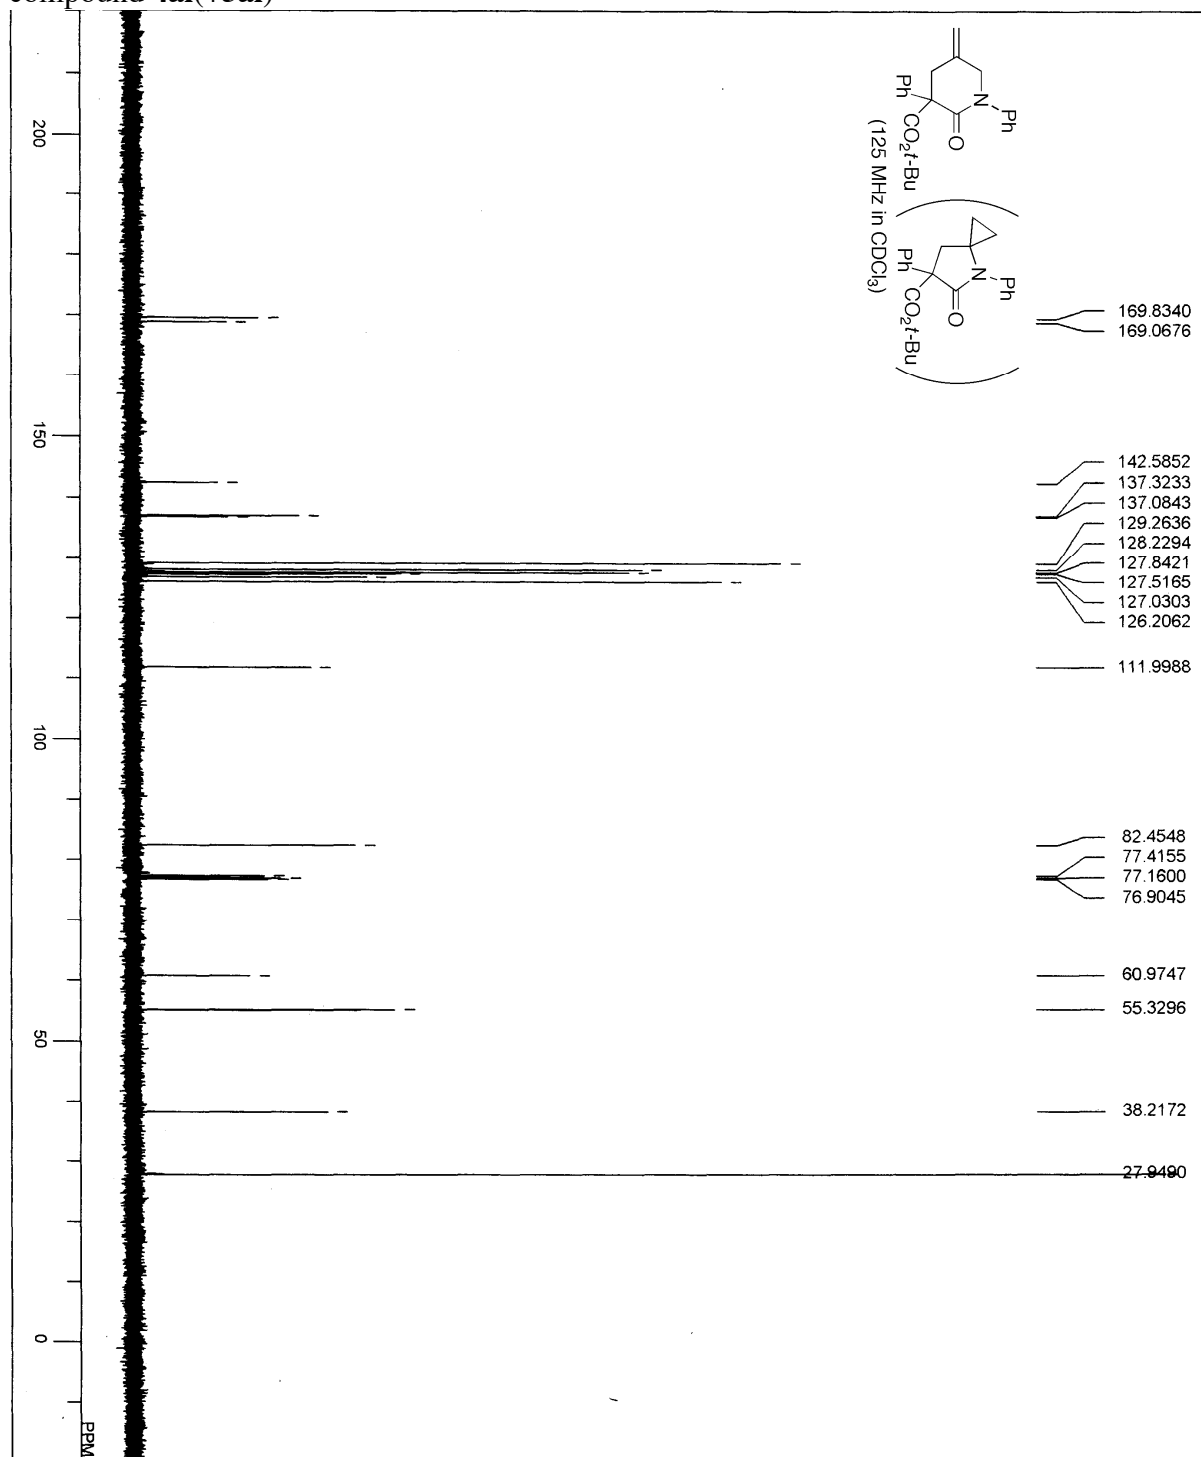



compound **4aj**

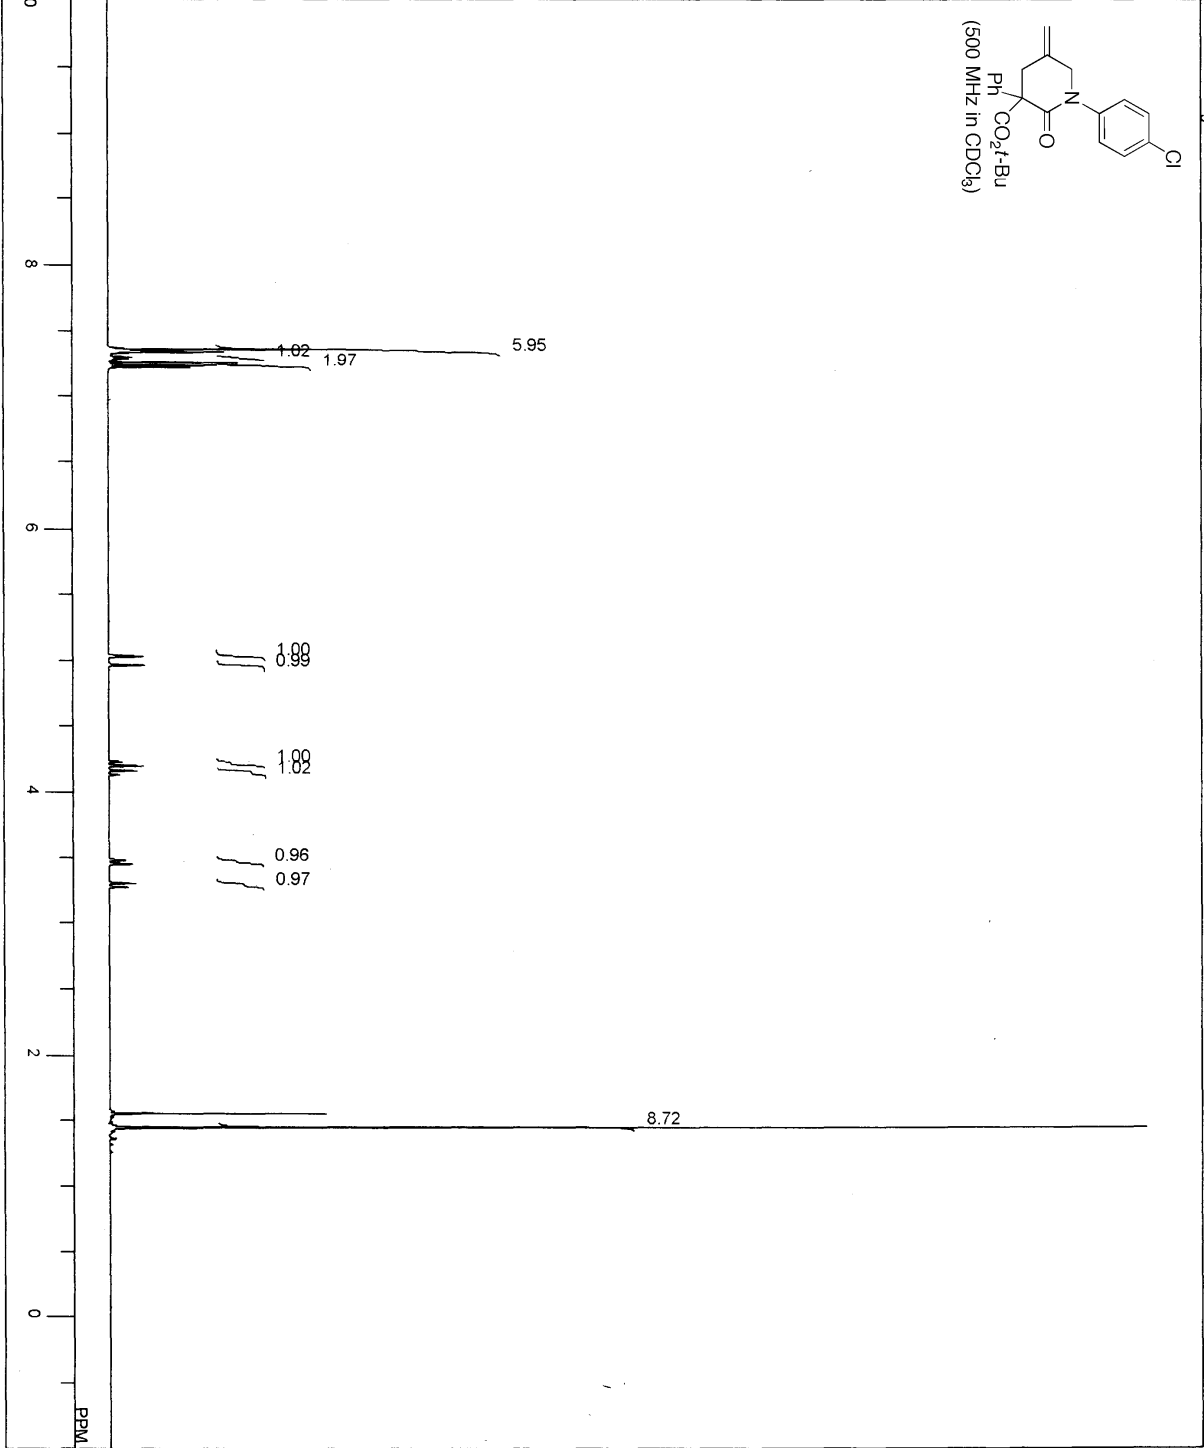

compound **4aj**

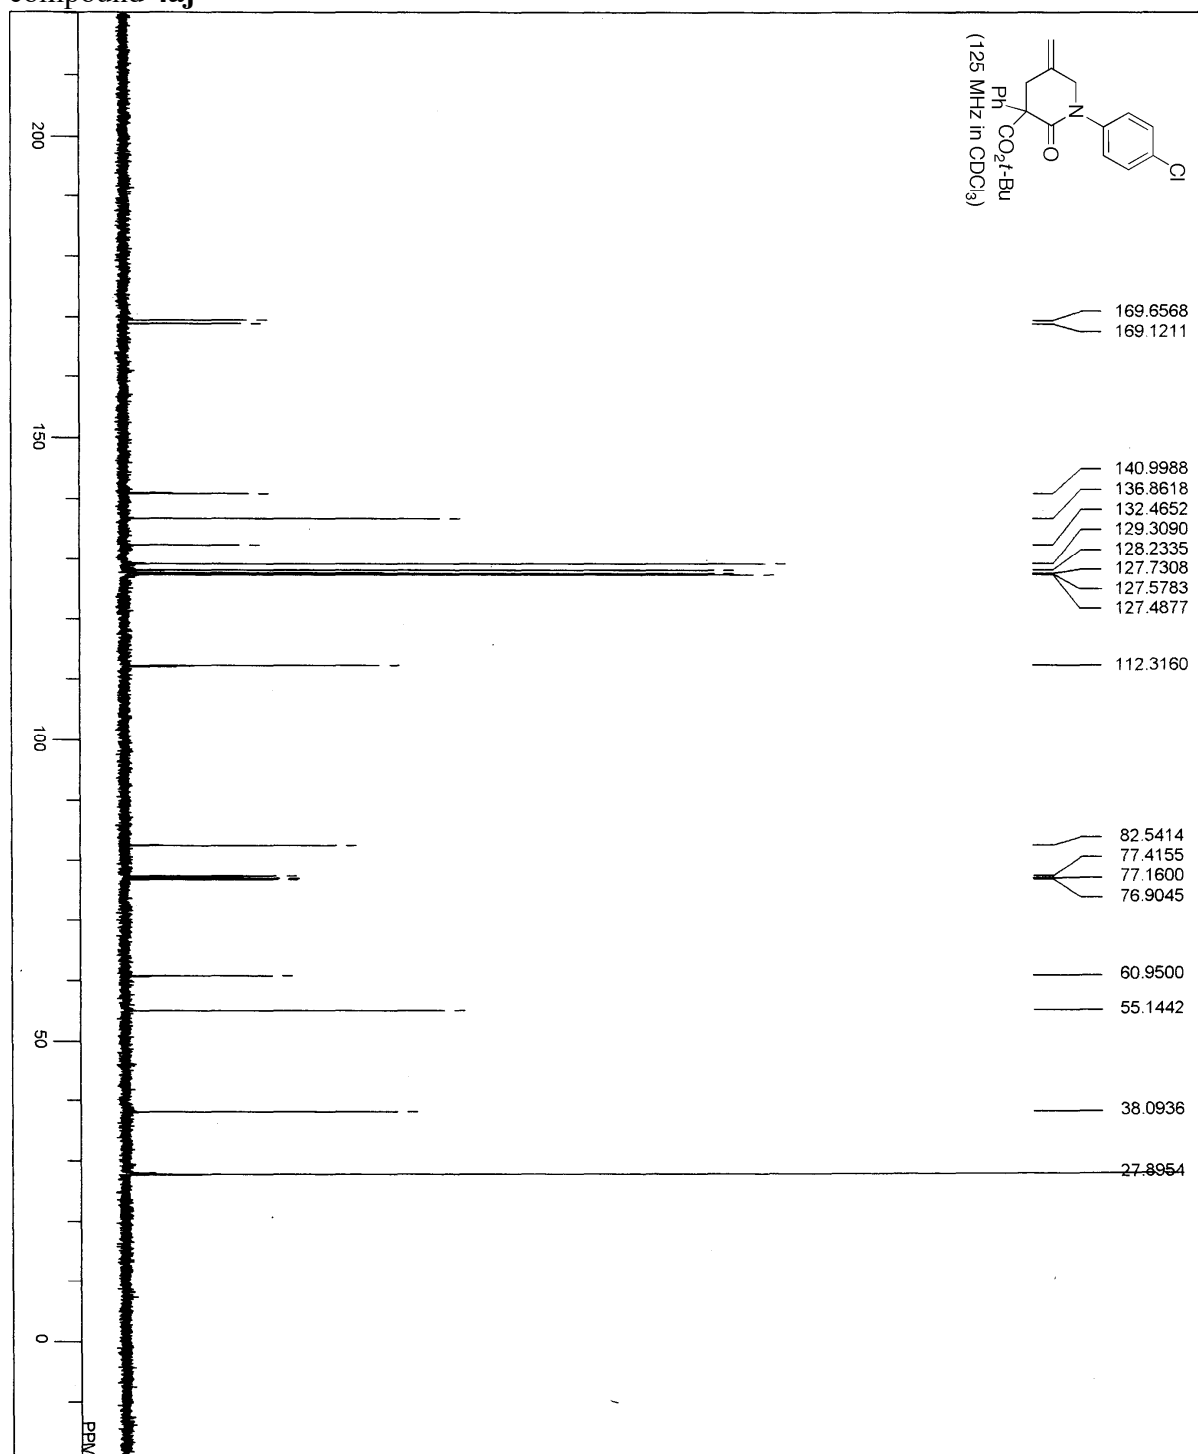

compound **4ei**(+3ei)

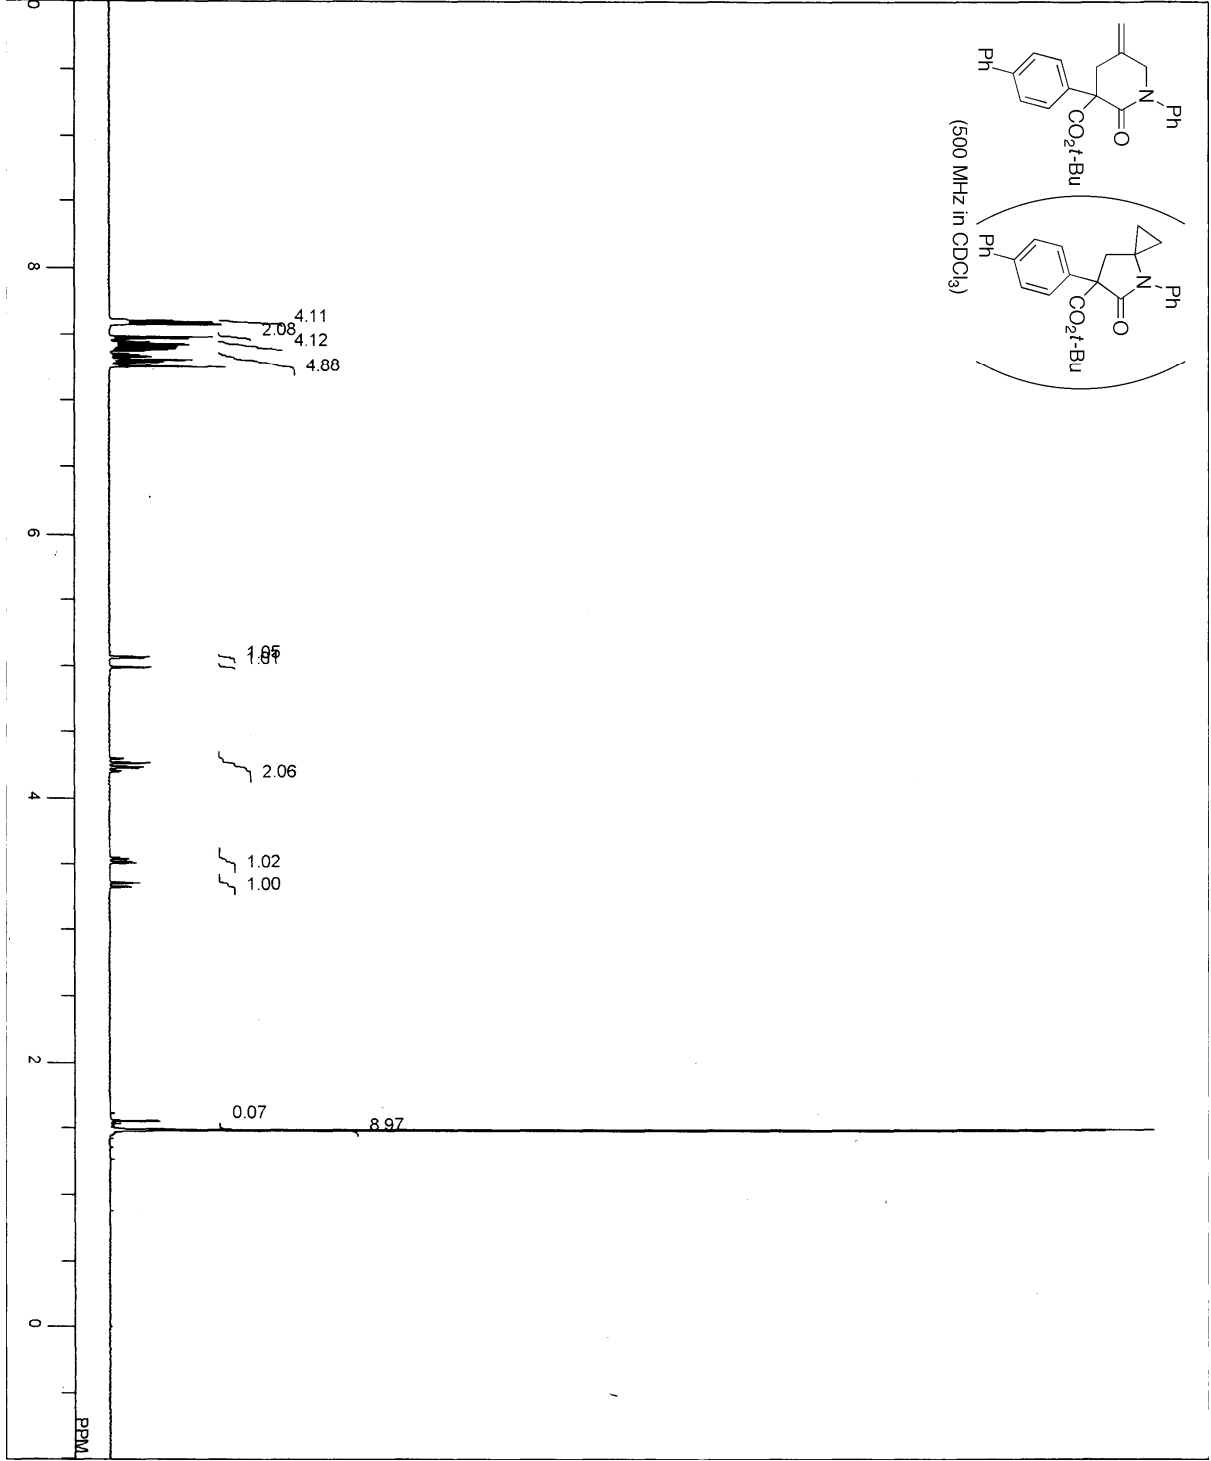

compound **4ei**(+3ei)

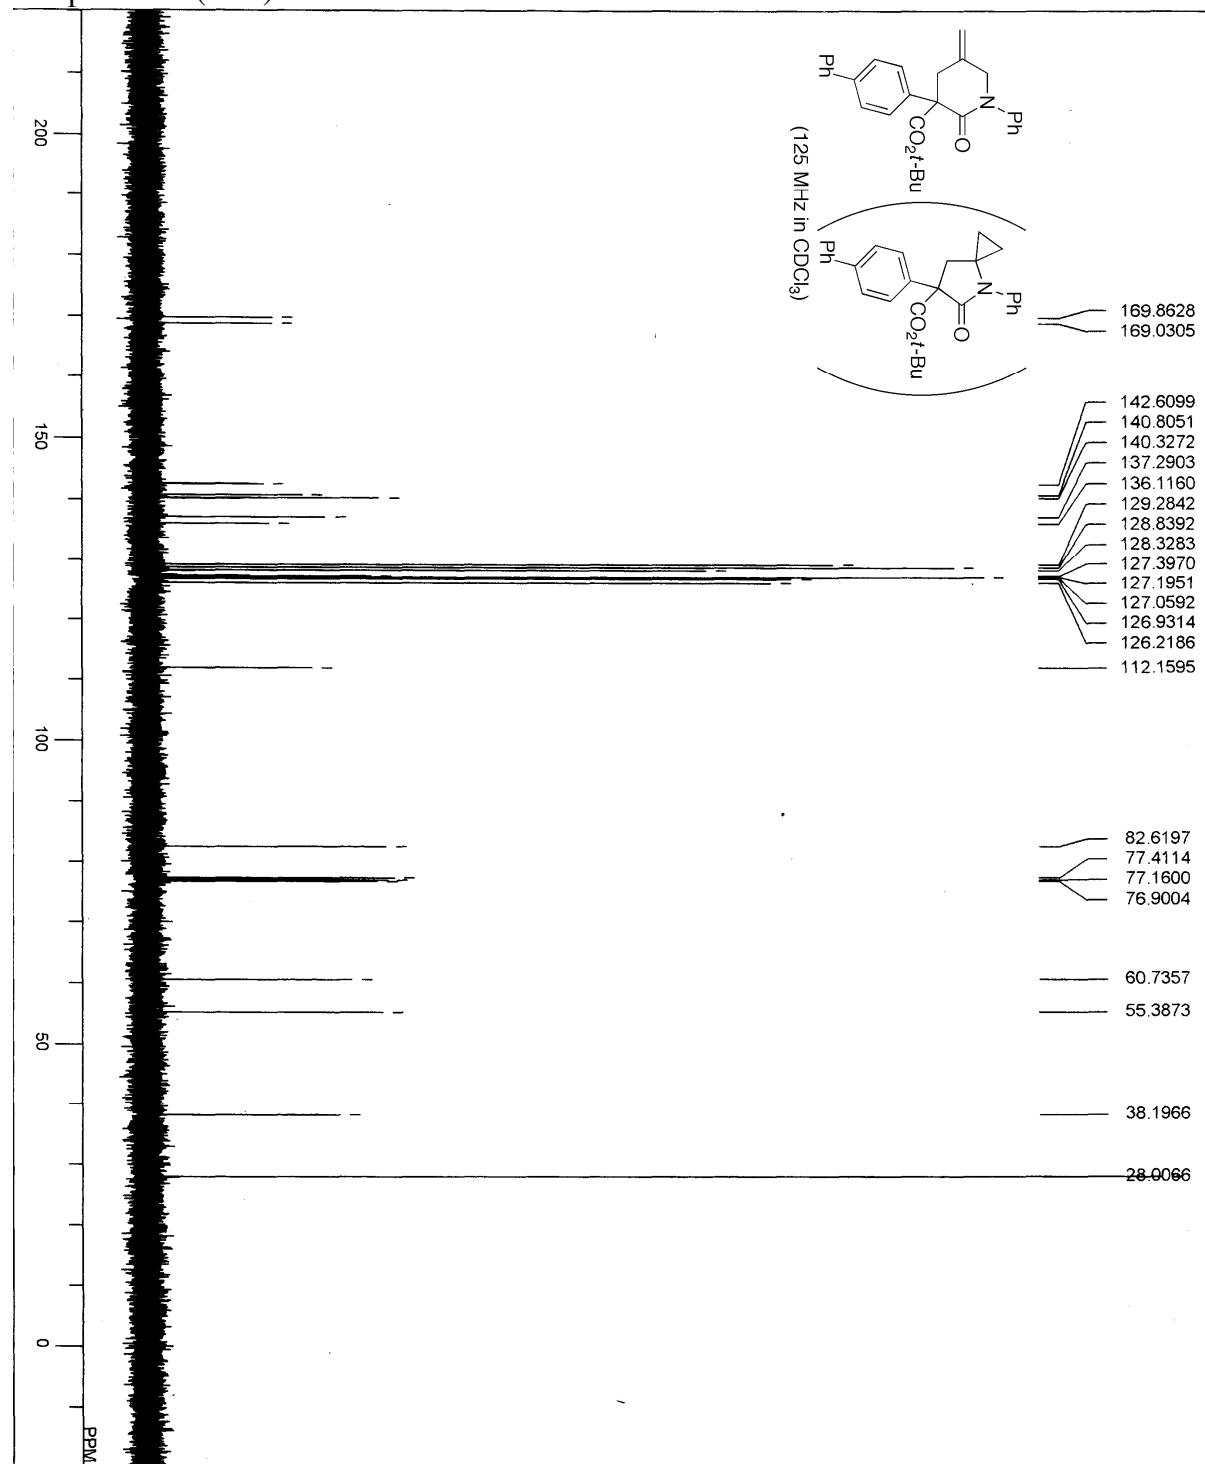

compound **4hi**(+**3hi**)

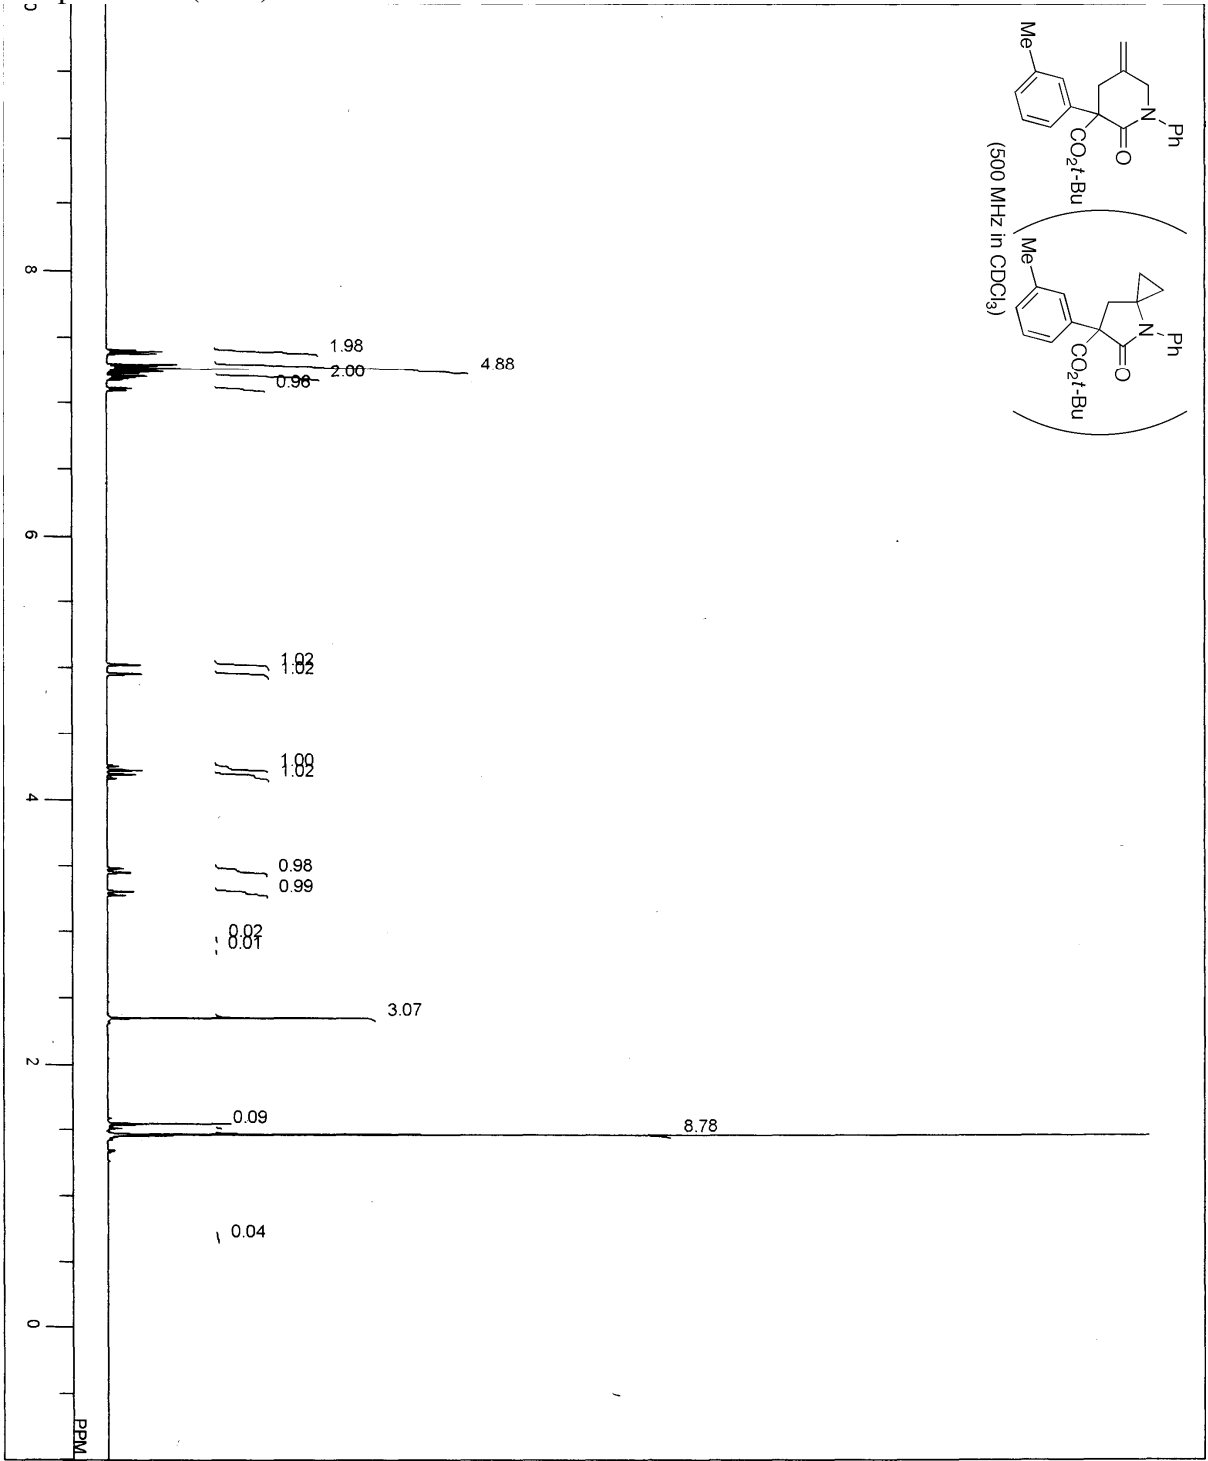

compound **4hi**(+3hi)

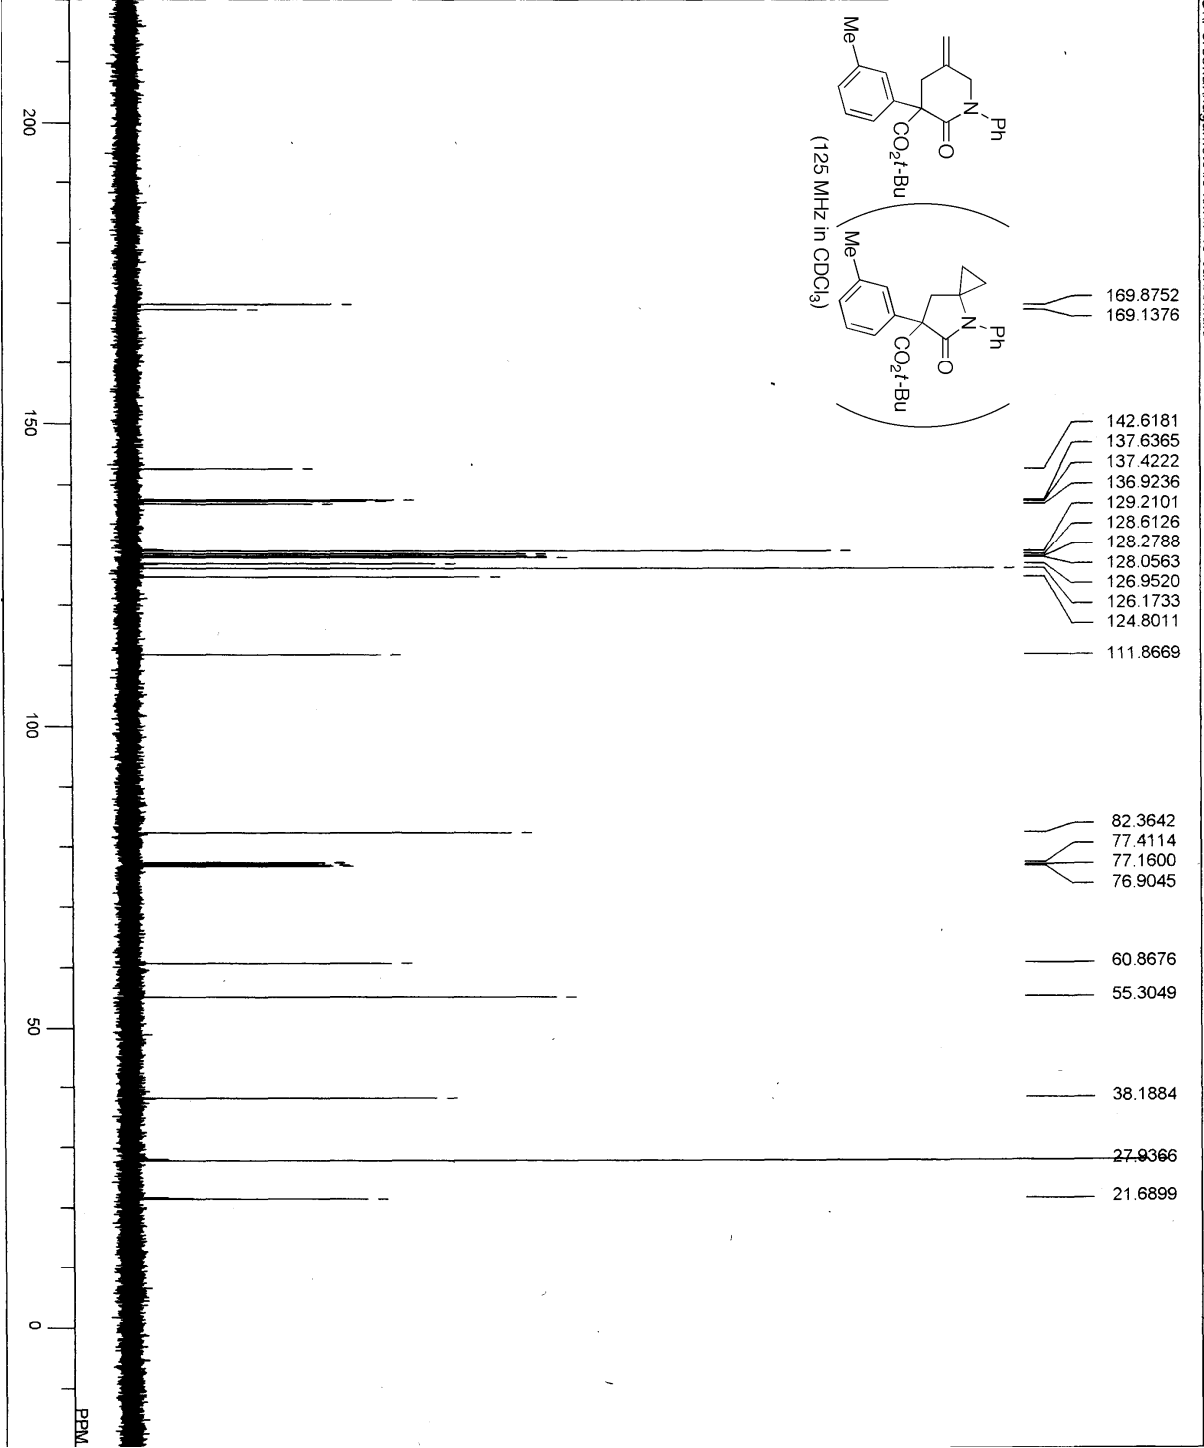

compound 5

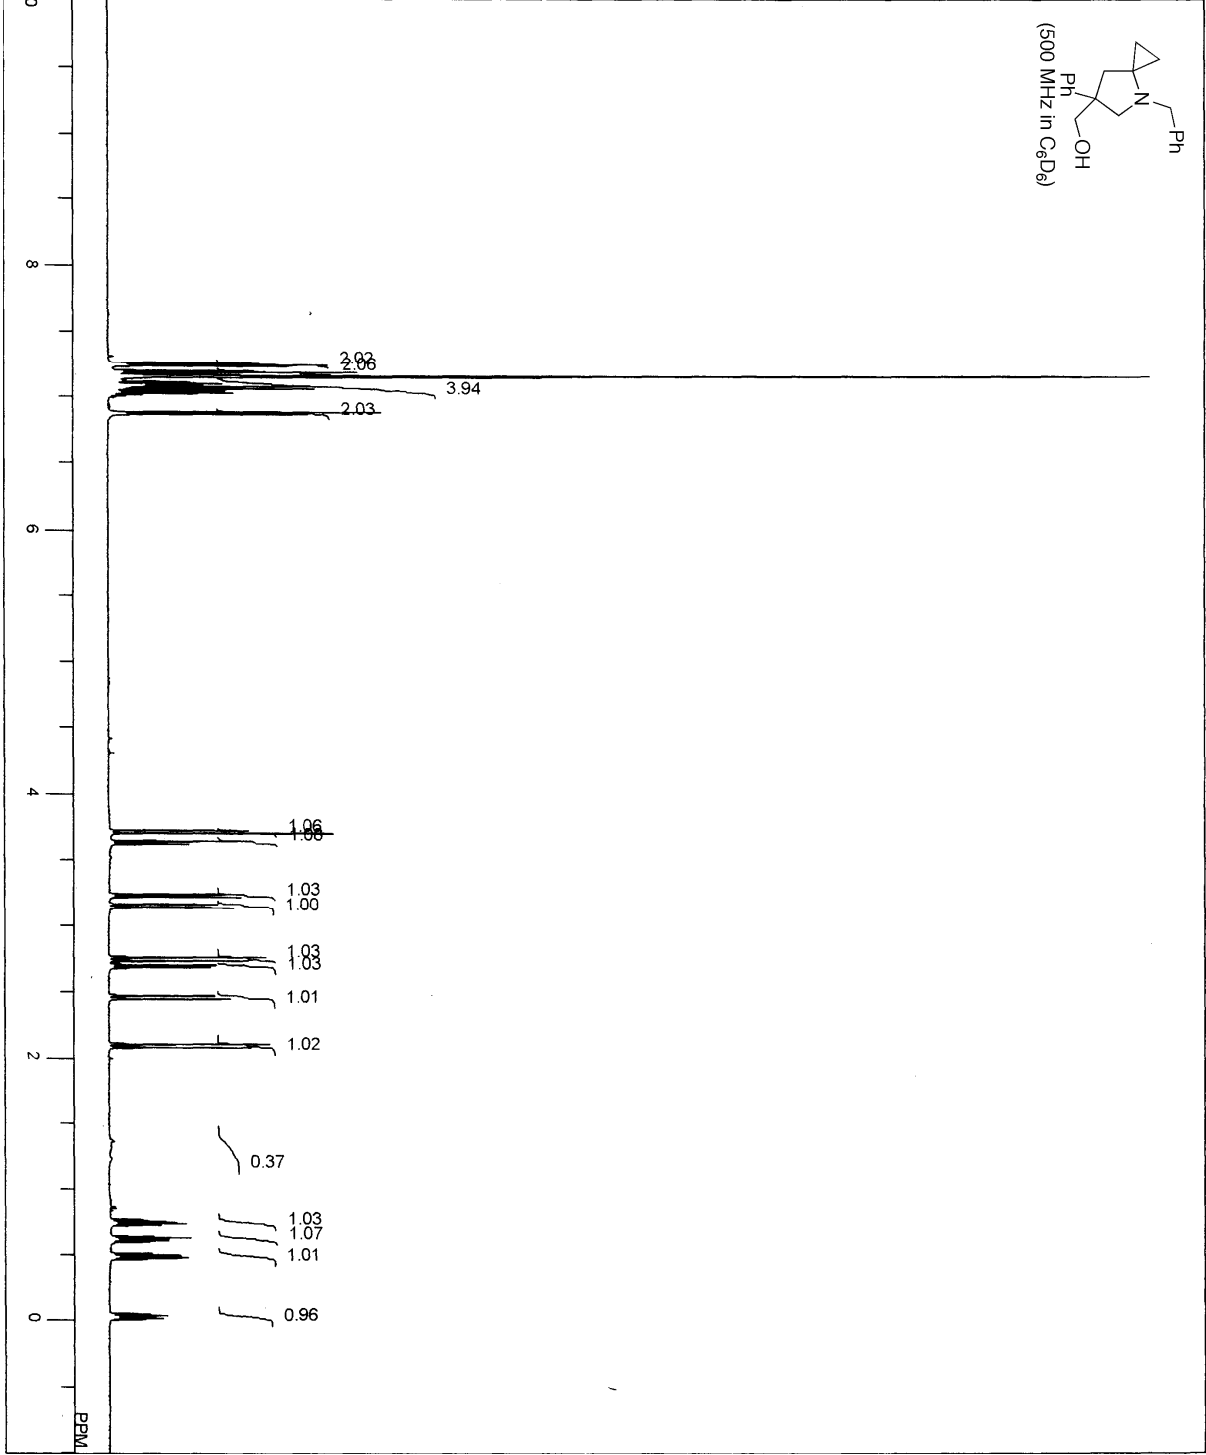

compound 5

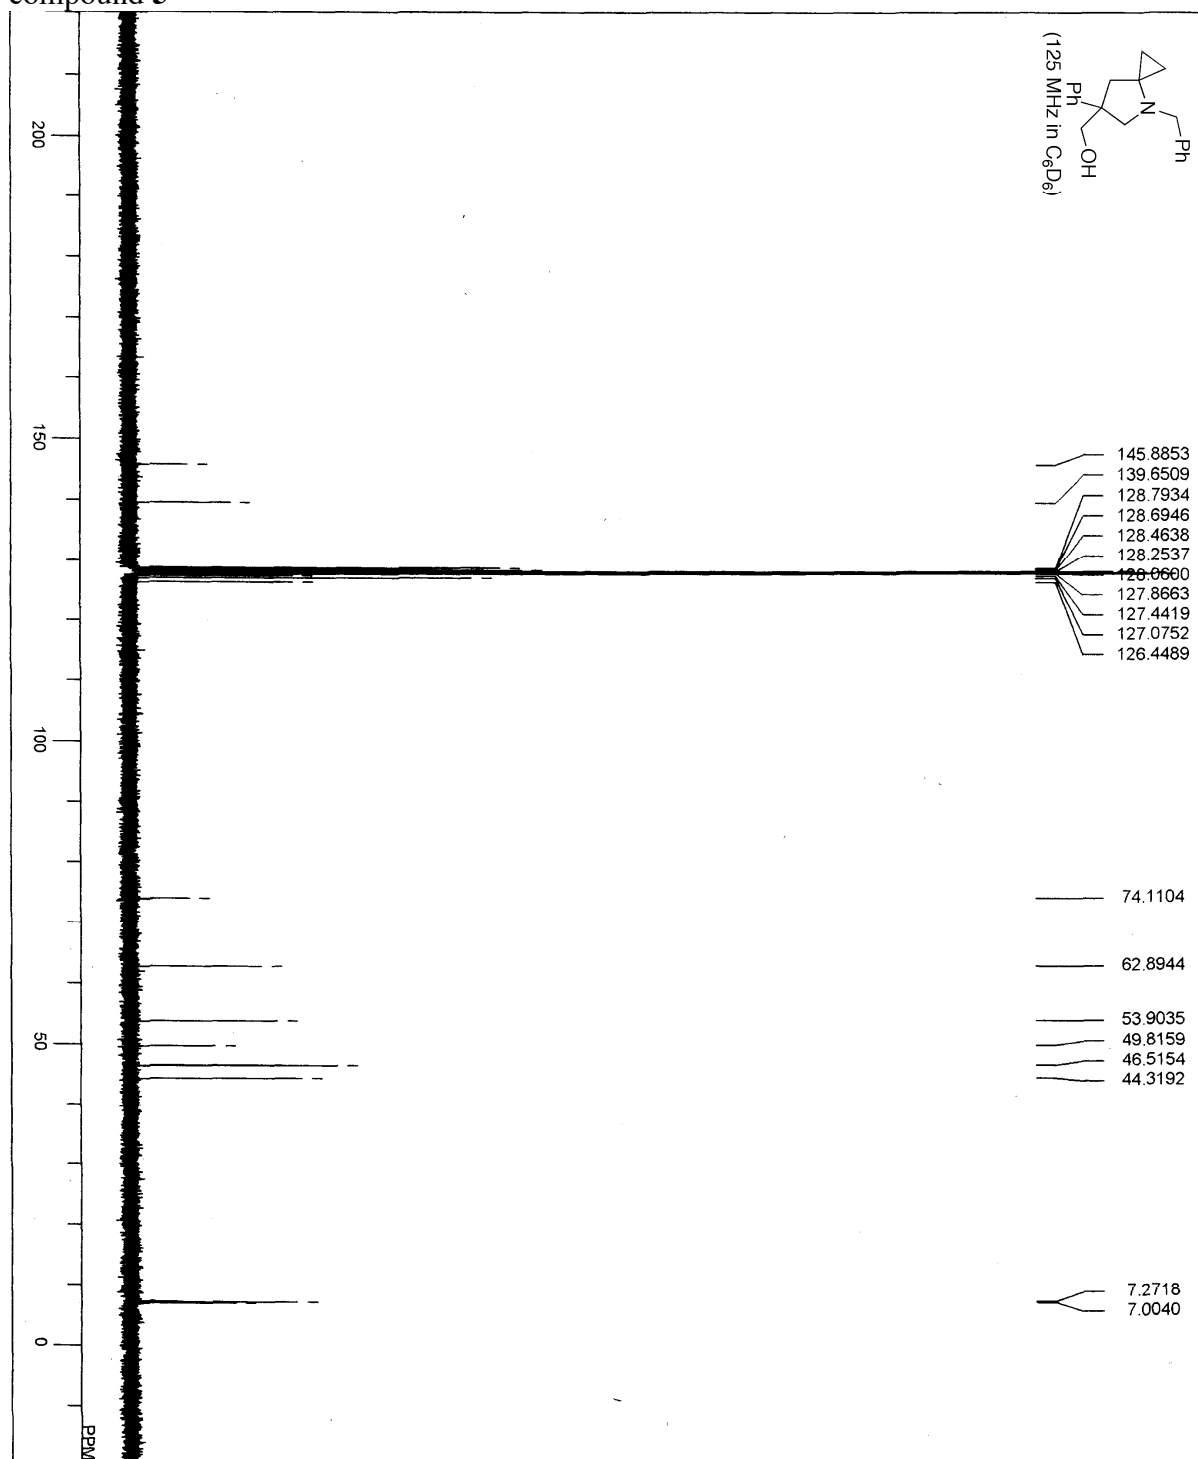



compound 6

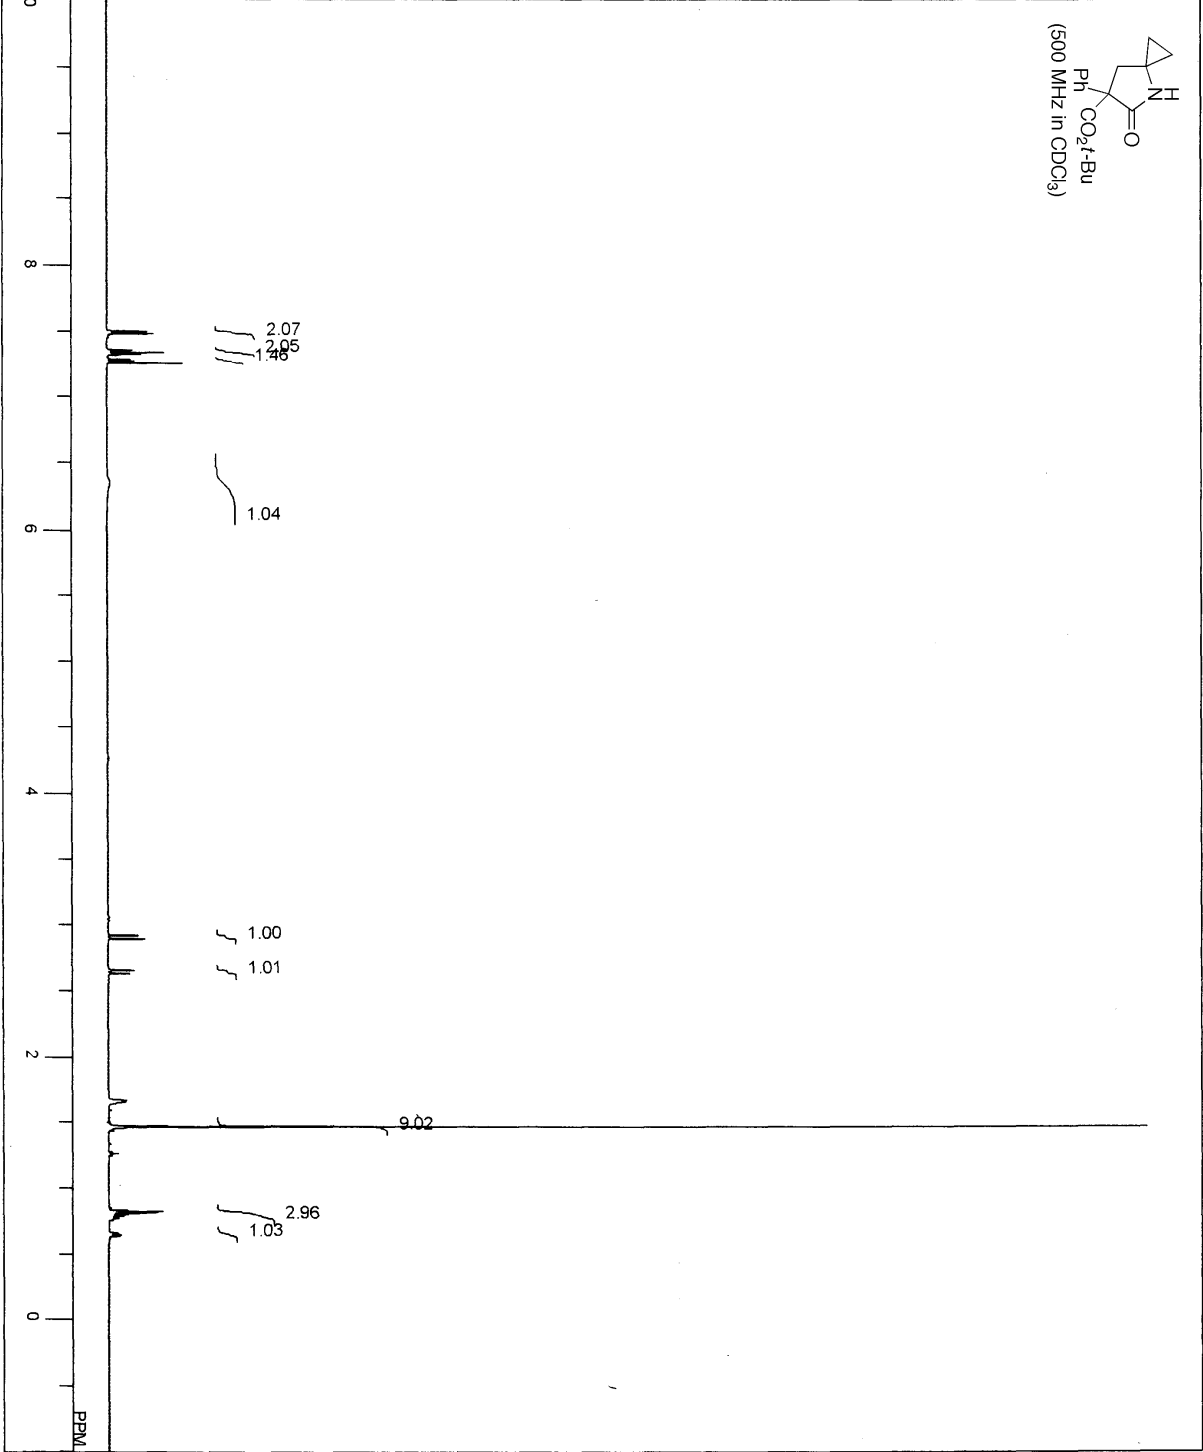

compound 6

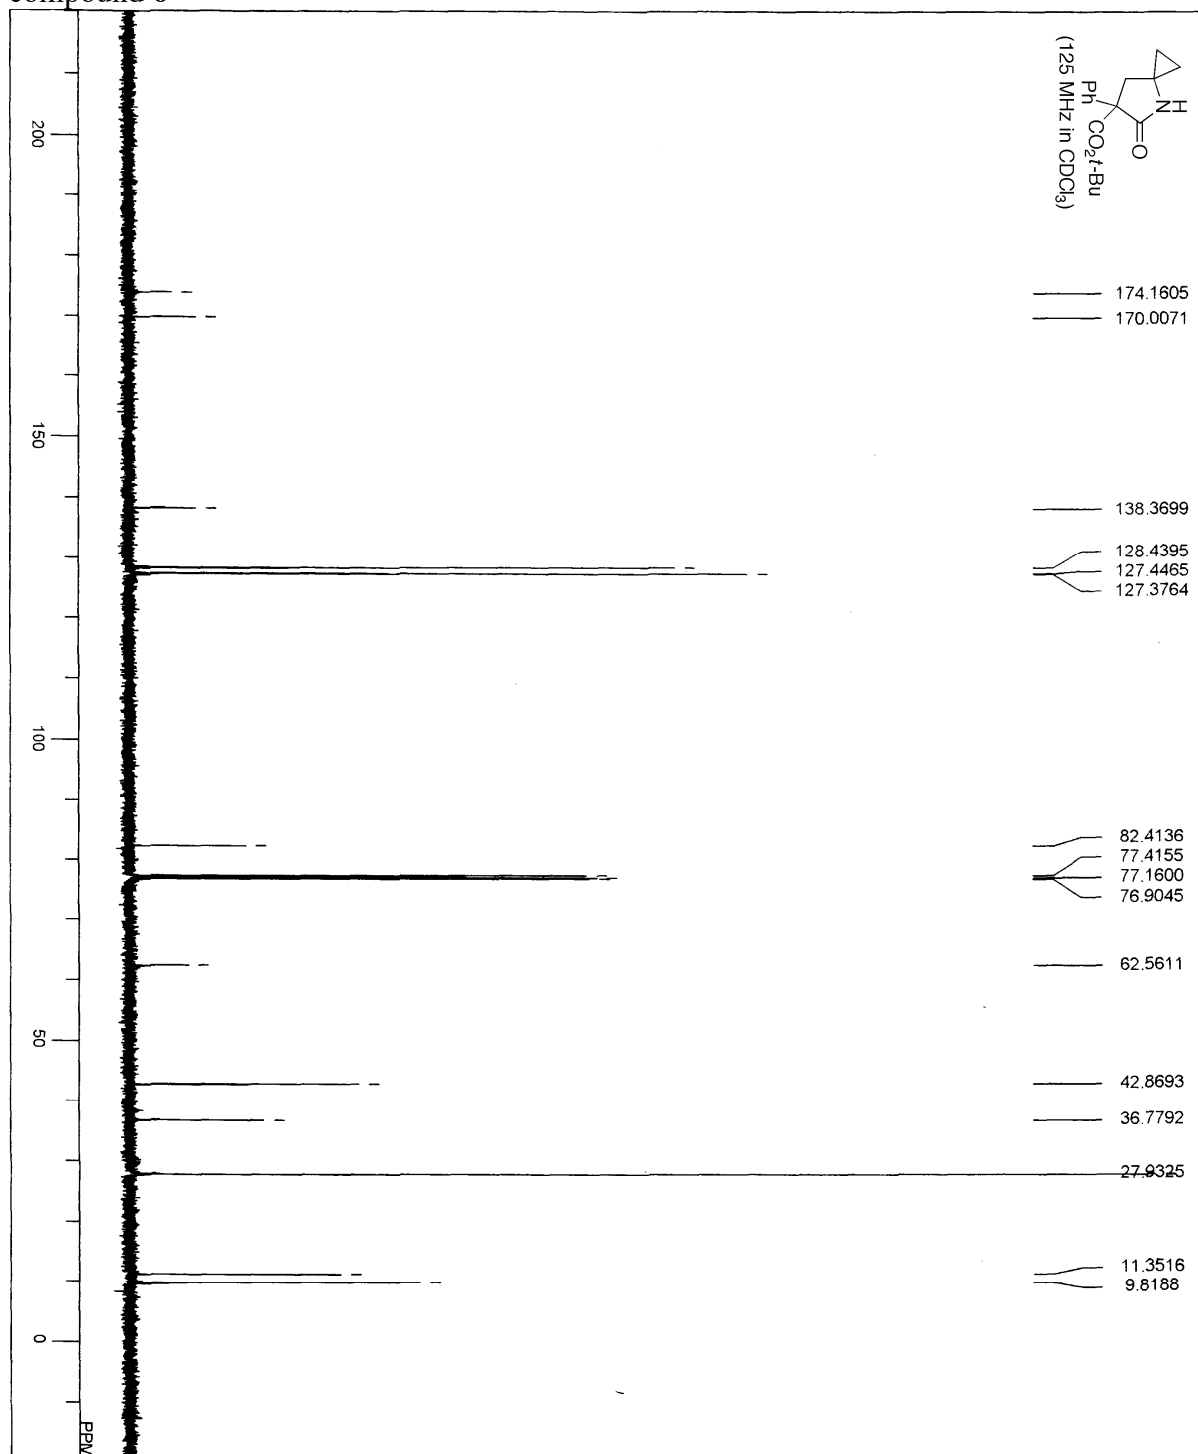

Supplement: c2cc35259a.pdf [file c2cc35259a.pdf]
